# Supplementary material for: Transcriptome Analysis Reveals Differential Expression of Genes Regulating Hepatic Triglyceride Metabolism in Pekin Ducks During Dietary Threonine Deficiency
Source: Front Genet. 2019 Aug 2;10:710. doi: 10.3389/fgene.2019.00710 (PMC6688585; doi:10.3389/fgene.2019.00710)
Supplement: Supplementary file 3 [file Table_3.xlsx]

## Sheet: Thr-D vs Thr-S
Supplemental Table 3A
Gene	logFC	logCPM	PValue	FDR
LOC101802412	-4.9109	7.47975	5.22491e-13	8.33999e-09
LOC101794341	-4.09605	7.98012	6.99365e-12	5.58163e-08
REG4	-2.42154	3.69812	1.09282e-11	5.81455e-08
RERGL	2.06639	3.18488	6.51237e-11	2.08469e-07
EEF1A2	3.00261	0.338979	7.83314e-11	2.08469e-07
LOC101794704	2.31788	5.82356	7.8362e-11	2.08469e-07
RSAD2	1.72015	3.9581	1.14241e-10	2.60501e-07
LOC101797569	2.32843	3.38339	1.45679e-10	2.90665e-07
LOC101790142	6.10304	5.21705	3.67023e-10	6.50936e-07
LOC101797547	-3.73315	1.22313	3.98263e-09	6.35707e-06
LOC101800895	2.03473	4.46405	7.29683e-09	1.05884e-05
UBE2QL1	2.28714	0.835915	8.80147e-08	0.000117074
LOC101800358	2.23524	5.41447	1.12479e-07	0.000133609
LOC101797265	3.66969	0.805546	1.17186e-07	0.000133609
LOC101791847	-2.33926	4.2692	1.37699e-07	0.00014653
LOC101792402	3.49339	-0.301811	1.8057e-07	0.0001731
ESRRB	-1.5875	2.73638	1.84357e-07	0.0001731
STOX1	-1.6711	1.40316	3.66579e-07	0.000323363
GNG11	1.3103	3.89839	3.88851e-07	0.000323363
LOC101792426	2.37248	0.465715	4.1034e-07	0.000323363
ARL6	2.08209	0.434418	4.25425e-07	0.000323363
CD3E	-1.4709	2.82458	4.9699e-07	0.000360589
NOXO1	4.4706	4.63372	6.20452e-07	0.000430593
LOC101802909	1.46841	4.41599	7.58266e-07	0.00049626
DPYS	1.80091	4.99821	7.86099e-07	0.00049626
LOC101799367	1.30305	5.41094	8.08343e-07	0.00049626
ETNPPL	-1.70002	5.48627	1.06013e-06	0.000626733
SAMD9L	1.32867	4.08534	1.14744e-06	0.000654122
AASS	-1.26374	4.95711	1.69775e-06	0.000921139
LOC101797566	-2.04784	7.1513	1.74109e-06	0.000921139
PCSK6	-1.11248	6.53378	1.78896e-06	0.000921139
PTPRR	3.25713	2.50348	1.97484e-06	0.000985074
LOC101801548	2.06555	2.16065	2.08068e-06	0.00100642
IGF2BP1	1.6768	1.12196	2.32616e-06	0.00106467
IRG1	4.93264	2.91529	2.33451e-06	0.00106467
SOCS3	1.52568	2.14506	2.89773e-06	0.00128482
MLKL	1.72927	3.24699	3.53235e-06	0.00152388
LOC101792809	2.13773	0.299294	3.66153e-06	0.00153803
BHLHE40	1.29361	6.33644	3.83043e-06	0.00156772
LOC101798523	5.17211	11.3767	5.5637e-06	0.0022202
TDRD1	-6.30056	-1.15536	6.35155e-06	0.00243522
MFAP2	-1.50809	3.78813	6.56567e-06	0.00243522
GPT2	-1.11507	7.34585	6.68111e-06	0.00243522
LOC101795130	-3.08592	0.164502	6.71279e-06	0.00243522
A2ML1	-1.59981	9.0204	9.29654e-06	0.00324764
INHBA	-2.0107	0.458091	9.42584e-06	0.00324764
LOC101802281	-1.16193	8.67725	9.56265e-06	0.00324764
NID2	-1.05689	6.22867	9.91275e-06	0.0032964
LOC101793855	-7.13834	2.05482	1.23054e-05	0.00400854
SCN4A	3.275	5.20342	1.2998e-05	0.0041495
LOC101796809	1.55453	1.66831	1.43136e-05	0.00447987
SLC9A2	-6.09627	-1.2767	1.50964e-05	0.00455291
FMO3	-1.5335	8.5602	1.51174e-05	0.00455291
LOC101797218	-0.921683	8.81743	1.55865e-05	0.00460725
LOC101793812	1.32203	3.52541	1.73732e-05	0.00500398
PRKCE	-2.11126	3.76646	1.77859e-05	0.00500398
DHTKD1	-0.941036	6.3225	1.78691e-05	0.00500398
PAQR9	-1.09381	4.16834	1.94563e-05	0.0053232
LOC101796990	-1.47052	3.92153	1.9676e-05	0.0053232
RTEL1	1.4087	2.44862	2.54659e-05	0.00677477
KIAA1107	1.62296	2.58744	2.84195e-05	0.0074366
LOC101794193	5.67508	-1.73253	3.37086e-05	0.00867834
ACOT12	1.81087	0.337093	3.51409e-05	0.00890347
LOC101805329	7.45417	-0.275083	3.60323e-05	0.00895321
PPAT	-0.916136	7.33178	3.6459e-05	0.00895321
ID2	-1.08645	3.9171	3.80294e-05	0.00919736
MEGF11	-1.98861	0.899992	3.92406e-05	0.00934864
LAPTM4B	2.15855	1.02981	4.05433e-05	0.00951695
LOC101800665	-1.17849	4.12887	4.20318e-05	0.00966568
ABCG1	-1.23498	2.54448	4.2388e-05	0.00966568
VWA3A	1.74469	0.28816	4.52576e-05	0.0101747
SNX10	1.55581	3.80566	4.68636e-05	0.0103228
TLR5	1.22034	1.97008	4.76761e-05	0.0103228
ETNK2	-1.70562	4.92876	4.78565e-05	0.0103228
LOC101793492	1.62299	2.4198	5.03942e-05	0.0107252
SAMD9	1.09623	3.38652	5.2893e-05	0.0110395
KHDRBS3	0.945277	5.07995	5.3254e-05	0.0110395
FGFR3	0.921013	7.00072	5.53163e-05	0.01132
RPAIN	-3.25918	-1.23042	5.84886e-05	0.0117425
CDO1	-1.3035	8.9661	5.89949e-05	0.0117425
PROSER2	-1.17565	4.12766	5.9588e-05	0.0117425
LOC101795926	1.59667	1.2919	6.23889e-05	0.0121445
LOC101790213	7.54392	-0.193516	6.72915e-05	0.0129339
LOC101796874	1.85835	-0.062436	6.80647e-05	0.0129339
TRANK1	1.04922	3.93704	7.4197e-05	0.0139333
HAL	-0.902374	7.30808	7.78687e-05	0.0144528
C1QTNF1	-2.03325	2.64491	8.16718e-05	0.0149844
TRHR	-1.45276	0.856972	9.52432e-05	0.0172758
PRICKLE2	-2.17129	-0.41291	9.80453e-05	0.0175756
LOC101795127	-1.23644	1.85741	9.9098e-05	0.0175756
USP18	1.34775	2.26562	0.000102078	0.0176303
LOC101793560	-2.59977	-0.760788	0.000102166	0.0176303
LOC101792702	1.52934	3.09269	0.000102796	0.0176303
ARFRP1	1.54273	6.34838	0.000103825	0.0176303
LOC101795276	1.22197	1.90024	0.00010937	0.0183765
LOC101789429	-1.47815	3.32068	0.000115174	0.0190721
LOC101793310	5.16947	0.406567	0.0001159	0.0190721
EPSTI1	1.5724	3.07555	0.000119992	0.019544
LOC101792349	8.16769	0.359414	0.000121269	0.0195525
MMP9	1.66977	0.242173	0.000124609	0.0198197
LOC101793805	5.65906	-0.308481	0.000125409	0.0198197
SLC34A1	2.88875	0.517535	0.000144619	0.0224504
LOC101794856	-1.60461	0.484778	0.000144869	0.0224504
FTSJD1	1.05728	3.77012	0.000149527	0.0227901
LOC101793178	6.64937	0.591739	0.000149916	0.0227901
LOC101790354	-0.939665	5.91164	0.000154138	0.0232108
LOC101805359	5.85341	-1.56173	0.000157055	0.0234291
PRMT8	-1.96663	1.49882	0.000161854	0.0239152
RYR3	1.1054	3.90691	0.00016331	0.0239152
LOC101789623	3.66741	-0.547142	0.00016651	0.0241622
LOC101802027	-2.10356	2.02335	0.000170008	0.0244475
GSC	4.20774	-0.0115474	0.000181193	0.0256822
A2M	0.91189	7.63899	0.000183558	0.0256822
LOC101802777	6.37187	-1.1562	0.00018363	0.0256822
LGALSL	1.27418	4.76195	0.000186886	0.0256822
LOC101798248	-1.22019	2.1976	0.000188424	0.0256822
LOC101794579	1.15827	3.75269	0.000188536	0.0256822
LOC101801038	7.555	-0.179184	0.000189857	0.0256822
LOC101793161	-0.853052	4.95632	0.000191487	0.0256849
SARDH	-0.861294	7.63742	0.000205343	0.0273141
RHOB	-1.43385	5.29968	0.000224165	0.0295713
LOC101793809	7.2904	-0.404566	0.000242498	0.0317275
LOC101800722	5.97365	-0.0115613	0.000249848	0.032219
COL9A2	-1.63808	1.61639	0.000250292	0.032219
LOC101798079	-1.93356	-0.340697	0.000254568	0.0323116
SNTG2	2.76985	-1.29502	0.00025686	0.0323116
DSG2	-1.46331	1.95452	0.000261312	0.0323116
IGFBP2	-1.24024	6.96936	0.000262661	0.0323116
CCDC41	0.942068	3.28087	0.000262805	0.0323116
LOC101804368	-5.28973	-1.80325	0.000263156	0.0323116
LOC101805239	0.882907	4.40561	0.000265898	0.0323989
ASAH2	4.14301	2.09481	0.00027311	0.0328591
SLC25A47	-1.30262	3.00212	0.000273792	0.0328591
BCL11B	-1.21696	2.07105	0.000283053	0.0337171
HSP90B1	2.0833	8.29809	0.000292295	0.034255
GART	-0.984111	10.3764	0.000293199	0.034255
LOC101791724	4.92731	9.16333	0.000294007	0.034255
SCRN1	3.11162	-0.366844	0.000304499	0.0352204
ABCG4	-1.50544	1.09469	0.000306968	0.0352505
WDR27	-3.16025	-0.0805876	0.000316095	0.0360393
FGB	0.843969	13.3645	0.000323298	0.0365318
TNFRSF6B	2.34295	4.66112	0.000324992	0.0365318
MRPL34	-1.10117	3.41047	0.000331413	0.0367956
DNAI2	-1.32188	1.08521	0.000331948	0.0367956
COL23A1	-1.23196	1.43087	0.000356108	0.0392014
SLC6A19	6.39978	-1.4161	0.000368643	0.0403033
SLC25A29	-1.29514	5.88598	0.000384284	0.0417275
FGF14	-2.92155	-1.4446	0.000400063	0.0431473
SMYD3	1.02134	2.69028	0.000415581	0.0445202
HPRT1	0.858769	4.45999	0.000428353	0.0454513
CPZ	-1.62187	0.164192	0.000429967	0.0454513
PRL	7.0541	-0.75038	0.000436286	0.0457829
GABRA4	4.37947	-1.42144	0.000438841	0.0457829
CAPN9	2.40078	-0.802093	0.000451438	0.0465372
PON2	-0.930584	7.06465	0.000451902	0.0465372
TBX15	-5.20363	-1.8537	0.000463128	0.0471352
LOC101798642	-4.03246	-0.21668	0.000463615	0.0471352
GCAT	-0.878561	7.68247	0.000503525	0.0506427
LAMC3	-1.05908	5.45013	0.000506286	0.0506427
LOC101791834	6.51173	-1.03523	0.000510805	0.0506427
LOC101798346	6.51173	-1.03523	0.000510805	0.0506427
CCDC15	-1.05956	2.75246	0.000519916	0.0509982
LOC101804411	-1.61039	-0.0273657	0.000520781	0.0509982
LOC101798110	6.47311	-1.06504	0.000538427	0.052177
GALNTL6	-1.9723	-0.694211	0.000540483	0.052177
DNAH11	1.93135	-0.64211	0.000544036	0.052177
AFP	-1.22795	3.80858	0.000545894	0.052177
LOC101801233	-1.35856	6.88434	0.000551916	0.0524386
LOC101793532	5.3006	-1.94856	0.000558187	0.0527206
NEFM	3.97136	-1.6615	0.000567346	0.0532705
LOC101791499	3.20703	1.30499	0.000571654	0.0533611
LOC101804141	4.43187	-1.28392	0.000575891	0.0534129
LOC101793250	6.66785	1.32447	0.000578902	0.0534129
TRIB1	-0.873114	6.15276	0.000602138	0.0552375
HSPA5	1.28452	8.52708	0.000614236	0.0560253
AVPR1A	3.66319	-0.774038	0.00063926	0.0573435
LOC101789923	6.35078	-1.15848	0.000639465	0.0573435
ZSWIM6	6.35078	-1.15848	0.000639465	0.0573435
POSTN	-0.922812	6.31236	0.000643452	0.0573787
RFX4	-2.53783	-1.33034	0.00065425	0.0579965
CERS1	-1.73023	-0.10455	0.000657647	0.0579965
FAM5B	-1.61759	-0.07631	0.000668342	0.0586158
LOC101790497	7.63467	3.94899	0.000680742	0.0593771
LECT2	3.60386	8.02911	0.000692624	0.0600851
TVP23A	1.01816	2.52628	0.000704248	0.0607633
CLCN4	2.7515	0.454651	0.000708818	0.0608287
NFX1	0.79608	4.65856	0.00071994	0.0614529
LOC101797093	6.44297	-1.2273	0.000743711	0.0630781
AMDHD1	-0.841735	6.66244	0.000746884	0.0630781
GJB1	-0.724636	7.83404	0.000770392	0.0647211
CGA	6.33775	-1.30394	0.000795694	0.0664966
GFPT2	1.17192	2.04297	0.000815408	0.0677536
LOC101791195	6.07078	-1.36635	0.000823468	0.0677536
LOC101794340	6.07078	-1.36635	0.000823468	0.0677536
LOC101793099	2.04577	-0.551029	0.000860981	0.0704768
LOC101797198	3.63316	1.15922	0.000885765	0.0719727
ABI3	-0.996301	3.73985	0.000888274	0.0719727
LOC101798355	3.80712	3.02741	0.000907831	0.0731859
ITK	-1.1363	1.70375	0.000912781	0.0732151
LOC101792268	1.3046	1.37267	0.000924221	0.0737621
LOC101790479	5.96442	-1.44309	0.000962364	0.0760458
LOC101795174	5.96442	-1.44309	0.000962364	0.0760458
MYO16	1.75689	3.17141	0.000988319	0.0770661
LOC101801253	-1.46302	14.3322	0.000988591	0.0770661
SLC41A2	1.30927	3.3499	0.000996084	0.0770661
ENTPD2	-1.09041	1.61277	0.000997334	0.0770661
ANKRD9	-1.29356	7.14005	0.00100064	0.0770661
BVES	1.98607	-0.0757303	0.00100424	0.0770661
BEAN1	1.33358	4.33368	0.0010292	0.0786033
CCNG2	-0.709402	6.22097	0.00104113	0.0791031
NUCB2	0.915561	7.12058	0.00104566	0.0791031
LOC101789716	-1.02671	1.94606	0.00106011	0.0796107
CHKA	2.42541	7.10569	0.00106234	0.0796107
RPGRIP1L	1.02952	2.01834	0.00109619	0.0817633
MDFIC	1.2679	3.60703	0.00111444	0.0824042
LOC101801190	1.63103	1.81087	0.0011151	0.0824042
SGMS1	0.726646	5.37068	0.00113063	0.0829125
KLRG1	-1.20684	0.723508	0.00113237	0.0829125
ASB12	-5.32704	-1.76577	0.00117919	0.0859459
PCDHA3	-3.37195	-1.70345	0.00118608	0.0860552
FGG	0.838959	12.8885	0.0011983	0.0865484
LOC101798222	4.37861	0.543861	0.00120943	0.0869555
TP53I3	-1.67202	3.62941	0.00121483	0.0869555
AQP3	-0.700902	4.97691	0.001247	0.0885907
NKAIN4	-2.41178	-1.12223	0.00125005	0.0885907
RAB32	0.941729	3.08525	0.0012618	0.0885907
LOC101793210	2.45339	-1.24791	0.0012635	0.0885907
ATP2C2	1.63816	-0.334725	0.00126542	0.0885907
LOC101803147	-1.5298	0.850568	0.00127902	0.0891515
LOC101792755	0.759535	3.6635	0.00128884	0.0894457
TMEM171	1.43503	2.16383	0.00130432	0.0901283
LOC101797777	1.27943	0.869674	0.0013157	0.0905224
LOC101790099	-0.849894	2.66665	0.00134333	0.0920265
LOC101800505	-1.28541	0.650401	0.00136551	0.0928527
HTR4	-1.3501	0.702877	0.00136702	0.0928527
UPP1	1.70743	-0.597051	0.00138169	0.0934512
OTOP2	2.28218	2.85233	0.00139644	0.0940503
WIF1	2.46399	-1.45084	0.0014155	0.0949335
LOC101790717	-1.04429	2.04473	0.00142184	0.0949596
RNF213	0.783877	6.00342	0.00143189	0.0952329
HPGDS	-0.755373	7.29182	0.00144106	0.0954448
LOC101790519	0.972935	3.2746	0.00146678	0.0967472
LOC101795687	5.9441	-1.71702	0.00148913	0.0975267
LOC101790078	-2.4241	1.09594	0.00149634	0.0975267
LRRC26	-1.28092	1.21309	0.00149908	0.0975267
ENO2	2.04302	0.300957	0.00150304	0.0975267
USP32	0.732644	4.70783	0.00152897	0.0988076
LOC101798363	-1.83687	-0.638749	0.00154514	0.0994499
LOC101800730	4.3144	0.657821	0.00156158	0.100104
PPIL6	-1.37628	1.81663	0.00159204	0.101123
AGT	0.7256	8.83379	0.00159995	0.101123
TYR	2.53426	-0.344086	0.0016016	0.101123
CHL1	3.72397	-0.51553	0.00160811	0.101123
LOC101793087	1.80424	0.578333	0.00161055	0.101123
LOC101800402	-4.87858	-2.02632	0.00161825	0.101123
LOC101798605	-1.74423	-0.454449	0.00162182	0.101123
LOC101803865	-1.35183	0.381241	0.00164843	0.101807
LOC101802165	2.89274	-1.43012	0.00164991	0.101807
STK32B	2.30707	-1.13514	0.00166158	0.101807
BACE1	-0.767429	5.88453	0.00166447	0.101807
CLDN19	-4.8759	-2.02751	0.00167266	0.101807
LOC101797677	-3.78877	1.25147	0.00167273	0.101807
LOC101797126	-0.840931	3.06443	0.00167744	0.101807
SMAD7	-0.893104	2.16163	0.00169885	0.102716
KCNG4	4.98829	-2.11423	0.00172398	0.103783
QPCT	1.303	6.03772	0.00173532	0.103783
NTN4	-1.14603	3.21025	0.00174125	0.103783
FAM20C	-0.793418	5.29413	0.00174401	0.103783
GUCA1B	-2.28097	-0.999292	0.00174901	0.103783
CPED1	1.00495	3.0814	0.0017648	0.104332
STMND1	4.87924	-2.16958	0.00181858	0.107115
UBA5	0.731544	5.0833	0.0018322	0.10731
ACSBG2	0.975613	6.78227	0.00184394	0.10731
LOC101797689	-1.51344	-0.0153336	0.00184468	0.10731
LOC101799417	2.82043	-1.82195	0.00184878	0.10731
LOC101799270	4.88185	-0.279365	0.00185833	0.107402
FSD1L	1.48038	2.25029	0.00186382	0.107402
SEC61A1	0.781936	7.07662	0.00187932	0.107605
LOC101803940	-0.943598	2.17399	0.00189231	0.107605
ATP8A2	1.17721	1.77498	0.00189833	0.107605
LOC101794992	-1.49612	0.310003	0.00189889	0.107605
LOC101791842	-0.729108	4.90391	0.00190105	0.107605
LOC101804845	-0.676946	8.05257	0.00193715	0.109261
PAX5	-1.49881	0.315006	0.00196026	0.110175
ABHD6	-0.67316	6.51365	0.00198621	0.111242
LOC101798932	1.25472	0.958074	0.00202937	0.113262
LOC101791958	-0.761588	5.51651	0.00204	0.113458
LOC101799795	-1.53233	8.1451	0.00204935	0.113582
HTR2A	-3.16475	-0.624448	0.00206877	0.113926
LOC101791581	-1.79606	-0.331276	0.00206982	0.113926
LOC101799533	-0.787685	11.9091	0.00212008	0.116291
LOC101791773	3.98386	-1.00219	0.00215236	0.117658
CCDC104	0.799843	3.00454	0.00216793	0.117749
ANKS6	1.32854	1.19145	0.00216878	0.117749
ELF3	1.50506	0.0343966	0.00219791	0.118925
RBP3	-1.82735	-0.78306	0.00222022	0.119268
LOC101801312	2.27127	-1.36307	0.00222168	0.119268
LOC101796326	5.28557	-1.90577	0.00222666	0.119268
ESYT3	-2.35283	-0.917664	0.00224294	0.119506
LOC101804135	0.707857	5.58221	0.00224607	0.119506
SFRP1	-0.826746	4.6479	0.00227608	0.1207
TMEM237	1.10613	1.15887	0.00232732	0.123009
WDFY4	-0.758032	3.06023	0.00233845	0.123189
LOC101793837	2.92034	-0.855153	0.00236251	0.124047
FBLIM1	-0.776429	2.69469	0.00239306	0.125239
LOC101793126	1.2068	1.19197	0.00241689	0.126073
LIN7A	2.71306	-0.550154	0.0024333	0.126516
LOC101797576	-0.993755	7.08355	0.00247994	0.128522
TFDP2	-1.05782	2.80108	0.00251209	0.12936
CD74	-0.727991	8.85753	0.00251232	0.12936
LOC101791000	3.19266	2.8965	0.0025214	0.12941
PKD2L1	-1.54671	1.04333	0.00255196	0.130559
LOC101792138	-0.866602	8.17997	0.00256202	0.130655
NTNG2	-2.58875	3.50824	0.00259481	0.131906
LOC101800797	-1.76942	-0.981523	0.00262075	0.132801
PIK3C2G	1.54035	-0.552897	0.00264132	0.13342
LOC101793557	5.19894	-1.96163	0.0026869	0.134063
LOC101798765	5.19894	-1.96163	0.0026869	0.134063
EMILIN2	-1.47699	0.886461	0.00268992	0.134063
BCKDHB	-0.917154	4.09725	0.00269439	0.134063
DHX32	2.37968	-1.50218	0.00269603	0.134063
LOC101795426	4.07829	-0.5026	0.00274757	0.136201
LOC101797806	1.71155	-0.86692	0.00278807	0.137781
SRPX2	-1.271	0.150466	0.00280877	0.138252
LOC101799024	-0.958007	1.32027	0.00281493	0.138252
LOC101804125	-0.745487	5.59531	0.00293869	0.143887
ADM	-0.774656	3.03227	0.00297659	0.145298
SVOP	4.95015	-2.13048	0.00300131	0.145718
TBC1D9	1.73483	2.65074	0.00301776	0.145718
PODN	-0.788062	2.83956	0.00301886	0.145718
SEMA3E	1.29583	0.456946	0.0030298	0.145718
KLHL6	-0.789672	2.6178	0.00303085	0.145718
LOC101801983	-2.21173	-1.05992	0.00306308	0.146826
LOC101802154	1.49342	3.52411	0.00309394	0.147861
KIF21B	-0.94502	2.25213	0.00310531	0.147961
DEF6	-1.13503	2.18051	0.00315337	0.149804
GFI1	-1.01936	0.870977	0.00318124	0.150142
SSTR1	0.868931	6.47011	0.00318671	0.150142
CCDC181	0.880476	1.71823	0.00319535	0.150142
SCARB1	-0.765124	6.8297	0.00319812	0.150142
RIMS4	0.916925	1.72122	0.00325625	0.152296
LOC101792015	-3.18411	-1.80736	0.00328129	0.152296
LOC101792351	4.42699	-1.25944	0.00328327	0.152296
EIF2AK2	0.727668	3.52572	0.00329118	0.152296
LOC101790261	-1.32483	0.218076	0.00329229	0.152296
LOC101791646	-2.12964	0.813886	0.00330124	0.152296
MMP7	1.82114	-0.897202	0.00334025	0.153652
DHCR7	1.53414	3.47029	0.00340699	0.156271
FGF23	5.10619	-2.01979	0.00342446	0.156623
G0S2	1.04315	5.89112	0.00345153	0.157409
CHTF18	-0.858036	5.6016	0.00346462	0.157556
ZMYM6NB	-0.926371	6.72905	0.0034891	0.158219
PLP1	-1.17954	3.75127	0.00353384	0.159793
SLC26A4	1.6555	1.02195	0.0035517	0.160147
PHOSPHO2	1.0718	2.49835	0.00357636	0.160582
PRR11	-1.37079	0.34302	0.00358294	0.160582
LOC101795489	-2.27514	8.13487	0.00359697	0.160582
SLC37A2	-0.933398	3.82484	0.00361662	0.160582
LOC101793435	2.70452	-1.88168	0.00361913	0.160582
BTG2	0.813495	5.94094	0.0036228	0.160582
LOC101800181	1.07192	0.829104	0.00363212	0.160582
LOC101797869	-1.66799	-0.621616	0.00364968	0.160582
NINJ1	0.780237	4.8914	0.00365337	0.160582
SLC38A1	1.23421	4.20595	0.00366572	0.160582
LOC101804756	-0.905373	1.48193	0.00367201	0.160582
LOC101801906	-0.957974	1.27707	0.00368463	0.160694
STEAP2	1.44189	-0.215552	0.00369878	0.160872
LOC101790109	-0.852215	2.21409	0.00374159	0.16202
LOC101791045	-1.4178	0.0756256	0.00374547	0.16202
LOC101804866	1.513	-0.242158	0.00379114	0.163552
LOC101790647	-1.05654	5.35036	0.00384632	0.165485
LOC101795671	1.16136	0.201226	0.00386587	0.165879
TENM3	1.06617	0.585062	0.00389016	0.166078
ARHGAP20	-1.2008	0.584534	0.00389131	0.166078
IFT57	-0.853321	2.80372	0.00391937	0.166829
ADSS	0.779778	4.95074	0.00395929	0.16808
PKIG	-0.910775	2.41344	0.00402065	0.170232
MTHFD1	-0.699856	9.71419	0.00406439	0.171629
LOC101797318	2.43949	2.64992	0.00408637	0.172102
GCH1	-1.12594	5.94444	0.00419366	0.175942
MYO1A	1.38974	1.14228	0.00419958	0.175942
BCL2L15	1.82161	-0.129701	0.00422656	0.176608
THBS2	1.94329	-1.21494	0.00433086	0.180494
ADRA1B	-0.756662	5.26766	0.00434791	0.180733
SLC5A11	-1.17968	0.95297	0.00436431	0.180943
KRT19	1.58522	-0.434724	0.00438609	0.181375
KLF15	-0.858188	5.83767	0.00443446	0.182901
MIB2	-0.959157	5.70838	0.00453228	0.186454
LOC101796295	-0.945121	2.29741	0.00456125	0.18673
RHCG	4.99748	-2.16147	0.00456239	0.18673
FAM173B	-1.15395	0.62575	0.00470808	0.191783
LOC101790909	5.00464	-2.08044	0.00470987	0.191783
LOC101801012	-1.55711	-0.373252	0.0047459	0.192146
LOC101798133	-0.965861	1.247	0.0047529	0.192146
LOC101804001	-1.13509	0.482175	0.0047549	0.192146
ACAP3	-0.839497	2.31556	0.00479337	0.193211
TRUB1	0.922131	3.48825	0.00483205	0.194021
CYTIP	-0.954822	1.70317	0.00483776	0.194021
LOC101797522	1.55359	4.07175	0.004888	0.195545
LOC101794791	-1.13651	0.448594	0.004904	0.195694
ANKRD6	2.16161	1.08606	0.00492008	0.195846
LOC101804700	4.16382	-1.44399	0.00494828	0.196479
PRDM14	-1.02672	2.07661	0.00496876	0.196802
LOC101802452	2.11506	-1.29377	0.0049928	0.197265
LOC101800912	-1.13526	2.79227	0.00502956	0.198227
LOC101804559	3.03627	-1.29299	0.00505064	0.198567
LOC101792454	1.18323	5.24987	0.00509688	0.199893
TMEM163	-2.08308	-1.08669	0.00515468	0.201664
EFHC2	1.37543	0.982246	0.00517577	0.201994
LOC101802256	-1.63289	-0.27335	0.00521729	0.203118
LOC101790335	-0.78785	7.65249	0.00530409	0.205995
SDK2	-1.88033	-0.915196	0.005321	0.20615
LOC101794789	4.65618	-2.26351	0.00535921	0.207017
LOC101799422	0.856979	2.35975	0.00536932	0.207017
LOC101801689	-4.77654	-2.08031	0.00539767	0.207609
LOC101794839	-1.35848	-0.0798237	0.00541675	0.207842
TFAP2C	-4.62727	-2.14876	0.00544855	0.208166
ENPP2	-0.798274	4.5881	0.00545129	0.208166
CBS	-0.937292	4.15235	0.00548034	0.208229
LOC101805253	-1.07249	2.46031	0.00548055	0.208229
LOC101802647	-4.62583	-2.14947	0.00549206	0.208229
GDAP1L1	-4.63699	-2.14373	0.00553461	0.209345
LOC101799608	-1.04563	7.48121	0.00560725	0.211591
LOC101795857	1.80175	-1.0326	0.00562275	0.211675
GLUL	-0.84524	9.98774	0.00567922	0.213298
LOC101804037	2.03149	-1.01989	0.0056943	0.213363
LOC101792521	-0.854808	1.79381	0.0057252	0.214018
PNPLA8	0.585454	5.84874	0.00582041	0.217069
LOC101801831	-0.890133	3.10333	0.00586271	0.217959
ZHX3	-0.67935	4.5424	0.00587158	0.217959
LOC101797947	2.66669	-1.89738	0.00600008	0.222212
LOC101803845	-0.873494	2.76117	0.00603326	0.222923
SLIT1	-2.15413	-1.03981	0.0060531	0.22314
PRKAG2	-0.651033	6.90655	0.00608796	0.223666
LOC101801727	-0.766623	5.13114	0.0060954	0.223666
LOC101800035	-0.920589	9.36475	0.00617169	0.225946
GRAP	-1.21574	0.51563	0.00620963	0.226815
BHMT	-0.811692	11.1564	0.00622694	0.226928
MASP1	-0.692256	6.11053	0.00624545	0.227084
LHFP	-0.846618	1.82162	0.00627132	0.227506
AHSG	-0.662844	13.6315	0.00629574	0.227875
KIAA1407	-0.719218	3.71487	0.00636977	0.230032
LOC101797970	2.80368	-1.15345	0.006419	0.231287
LOC101790785	-1.14877	1.27233	0.00649088	0.232628
LOC101804351	-1.12722	0.388116	0.0064921	0.232628
SH3KBP1	0.868932	3.27042	0.00649995	0.232628
LOC101792630	0.928766	3.14783	0.00656447	0.234081
LOC101797096	4.7573	-2.21017	0.00658455	0.234081
LOC101802401	4.7573	-2.21017	0.00658455	0.234081
GATA5	0.669782	5.6239	0.00661744	0.234618
LOC101791883	-0.611179	5.75889	0.00663763	0.234618
COL20A1	-1.34749	2.03215	0.00664373	0.234618
LOC101793408	2.05682	-1.47417	0.0066721	0.234874
LOC101804528	3.83249	-1.65551	0.00668042	0.234874
LOC101801644	-2.99915	-1.9063	0.00672207	0.235819
LOC101800839	-0.974655	8.07401	0.00698496	0.244329
MAP3K8	0.776986	2.00554	0.00699527	0.244329
NLGN3	-0.793424	2.36311	0.0070302	0.245013
LEPREL4	-1.22783	0.0992659	0.00713688	0.248189
KCNIP4	1.84338	-1.27318	0.00715278	0.248201
LOC101792678	-1.2618	-0.122949	0.00727196	0.251789
LOC101803211	-1.02477	1.05051	0.00728913	0.251838
LOC101796191	-0.718448	3.73679	0.007335	0.252324
NSDHL	0.68853	6.20943	0.00734082	0.252324
LOC101795742	2.79683	-1.83134	0.00736341	0.252324
AGPAT2	-0.870312	5.7511	0.00736644	0.252324
LOC101797942	1.84637	-1.12975	0.00738324	0.252358
AMPH	-1.21484	2.84004	0.00741454	0.252887
LOC101805190	-0.841922	7.16357	0.00743075	0.252899
ALG12	0.798367	4.76414	0.00747237	0.253774
GLIPR1	-1.69316	-0.714411	0.00759348	0.256813
PTPN14	-0.859695	1.44412	0.00759402	0.256813
LOC101796506	2.19053	1.31743	0.00762602	0.25735
PGBD5	-1.09988	1.00889	0.00767232	0.258366
LOC101803733	-3.65138	1.07023	0.00780191	0.261968
LOC101797638	-1.60049	-0.777885	0.00783409	0.261968
LOC101798048	-0.988311	8.50991	0.00786965	0.261968
LOC101791640	-2.19894	1.36205	0.00787491	0.261968
PAPSS2	-0.807179	3.39126	0.00787508	0.261968
UFM1	0.605689	4.48415	0.00787775	0.261968
ABCG8	-1.21835	4.43362	0.00800472	0.265637
SLC22A4	-0.641355	5.27973	0.00808958	0.267541
SLC22A2	-0.889768	4.50143	0.00810316	0.267541
ADAMTSL2	0.89158	1.8992	0.00812713	0.267541
SQLE	1.21747	5.20481	0.00814508	0.267541
DPEP1	1.57633	-0.665489	0.00814589	0.267541
ENO4	-1.38035	0.972989	0.00816668	0.267673
SUN2	-0.819904	2.8267	0.00830685	0.271416
SOBP	-1.11685	1.20837	0.0083283	0.271416
GGT7	1.11471	4.02722	0.0083319	0.271416
LOC101790628	2.14193	-1.63053	0.00836802	0.272037
GPR137C	-0.631098	4.49167	0.00848983	0.275414
FGA	0.655775	13.6406	0.00850862	0.275414
LOC101791360	2.66914	0.182072	0.00853165	0.275414
PLXNA4	-1.58467	2.43078	0.00854089	0.275414
LOC101804713	-1.39356	-0.508094	0.00859505	0.276008
DDX60	0.851542	3.15912	0.0085959	0.276008
LOC101805352	-1.88537	-1.01465	0.0086112	0.276008
CEP70	1.1702	2.50048	0.00866477	0.276866
TSPAN7	2.13766	-1.62876	0.00867791	0.276866
LOC101803170	-1.12093	3.05012	0.00869002	0.276866
ZAP70	-0.960998	1.63081	0.00873695	0.277447
LOC101789604	-0.936961	6.91246	0.00874912	0.277447
VPS37A	0.618925	4.17953	0.0087732	0.277447
GPR155	1.14783	4.48082	0.00877777	0.277447
LOC101805280	-0.951407	0.783353	0.00886801	0.279746
NQO1	-1.04197	5.63935	0.00891008	0.280518
TK1	-0.93242	2.37118	0.0089339	0.280714
IKZF3	-1.10861	1.33927	0.00896406	0.281109
LOC101791356	-2.25323	-1.47973	0.00903867	0.282523
LOC101796846	0.659766	4.7971	0.00904455	0.282523
LOC101792446	1.11064	1.11058	0.00911305	0.284107
SEC14L2	-0.956819	7.12954	0.00914596	0.284573
LOC101793969	-0.905586	5.14828	0.00919853	0.284771
LOC101799710	3.52579	-0.387657	0.00920572	0.284771
FAM132A	-1.79192	-0.570834	0.00925118	0.285623
LOC101801916	0.900331	2.80262	0.00934686	0.28802
STAC	0.976284	1.52349	0.00941279	0.289493
LRRN1	-2.87591	-1.96575	0.00947108	0.290726
LOC101799819	-1.78663	-1.29446	0.00949167	0.290798
HMGCL	-1.62767	9.05979	0.00951701	0.291016
LOC101791974	1.15154	1.78295	0.00953982	0.291156
TRPS1	-0.900175	0.933649	0.00962736	0.293267
FAM81B	-1.2747	-0.0924181	0.00967527	0.293793
LOC101800727	-1.16787	3.04769	0.00968144	0.293793
DNTTIP2	0.735609	2.90236	0.00971278	0.294185
IFT46	1.33065	-0.524598	0.0097577	0.294598
LOC101798015	-0.791463	4.47778	0.00976523	0.294598
LOC101801653	-0.965904	6.92807	0.0097818	0.294598
SLC35F1	-1.44651	-0.658082	0.00997687	0.299906
MCAM	-0.675503	4.63304	0.00999562	0.299906
PHYHIPL	4.48264	-2.33383	0.0100357	0.300545
CD226	-1.06148	0.674697	0.0100926	0.301297
LOC101796654	-0.679749	5.64045	0.0100986	0.301297
BCAS1	1.55086	-0.1869	0.0101343	0.301403
DPP10	4.49534	-2.32835	0.0101399	0.301403
LOC101804901	-4.49044	-2.21027	0.0101842	0.302157
EML5	-4.47883	-2.21623	0.0102513	0.303042
BICD1	-4.47916	-2.21606	0.010252	0.303042
LOC101796691	4.62978	-2.27433	0.0103589	0.304711
MITD1	0.716657	2.4277	0.010373	0.304711
ARHGAP19	-0.819123	2.8232	0.0103848	0.304711
DBI	-0.645139	7.87701	0.0104319	0.30503
NEU2	-1.44303	-0.78919	0.0104413	0.30503
DLGAP2	-2.1806	-0.165776	0.0104707	0.30503
ADAMTS15	1.82762	-1.28065	0.0104721	0.30503
PCBP3	-0.878301	1.10214	0.0105424	0.306518
LOC101804149	-0.774213	5.14382	0.0106073	0.307245
ESPL1	-1.10791	1.90849	0.0106241	0.307245
LOC101802435	1.04884	0.931046	0.010633	0.307245
LOC101792067	0.808107	3.12616	0.0106538	0.307245
SLC25A48	0.940891	3.32383	0.0106637	0.307245
LOC101804285	-0.624288	3.63675	0.0107289	0.308567
LOC101802126	1.31874	-0.417232	0.010845	0.311346
COL8A2	-4.47211	-2.21851	0.0109277	0.312595
LRP2	1.23391	0.302641	0.0109707	0.313263
LAMA2	-1.26159	0.692094	0.0110933	0.315333
LOC101802982	-1.27243	-0.164377	0.0110939	0.315333
DNASE1L3	-0.748974	5.43427	0.0111121	0.315333
COL6A3	0.862672	4.41221	0.0111222	0.315333
LOC101797294	0.872375	2.36553	0.011295	0.319666
DUSP8	1.03673	1.11073	0.0113248	0.319941
PPM1K	-0.967019	4.04148	0.0114128	0.321631
LOC101798104	1.45009	-0.314487	0.0114249	0.321631
UGT8	0.644183	5.59157	0.0114964	0.322814
LOC101794768	1.23328	3.92451	0.0115074	0.322814
P2RX5	-0.861309	1.3145	0.0115566	0.323142
LOC101799455	0.990203	0.987562	0.0115596	0.323142
MASP2	0.705374	6.33299	0.0116238	0.324369
LOC101802269	-2.37694	-1.75288	0.0117	0.32485
CNTN4	-1.12376	0.0784659	0.011729	0.32485
GPRC5B	-0.788738	1.3905	0.0117357	0.32485
GNAT2	-0.889165	1.60912	0.0117403	0.32485
PMM1	-0.749233	4.47802	0.011752	0.32485
ART5	-0.916132	2.30066	0.0117732	0.32485
LOC101800394	2.11462	3.02328	0.0117835	0.32485
ASS1	-0.756402	2.57309	0.0119142	0.327888
ALK	-2.04277	-1.36194	0.0119804	0.328828
TRNAG-UCC	2.1886	-1.83118	0.0119896	0.328828
LOC101796773	-0.936981	7.22379	0.0120929	0.329692
LOC101803125	-1.35972	-0.654127	0.0121263	0.329692
LOC101805316	-4.49389	-2.21006	0.0121353	0.329692
METTL5	0.782402	1.41111	0.0121429	0.329692
LOC101802873	-1.08938	0.240933	0.012145	0.329692
NRXN1	-0.687562	4.04766	0.0121938	0.330453
CMPK2	0.927595	3.09149	0.0122427	0.330935
LOC101804058	-2.2291	-1.52213	0.012253	0.330935
IL20RA	1.36892	-0.25584	0.0124004	0.334351
SLC23A3	-1.16131	1.13722	0.0124619	0.335001
LOC101791992	1.1142	2.85897	0.0124665	0.335001
LOC101804768	-0.70393	7.06701	0.012594	0.337857
LOC101800008	3.1512	-1.73386	0.0126788	0.339177
LOC101803817	3.11878	-1.66503	0.0126857	0.339177
LOC101802271	-0.791608	5.60527	0.0127782	0.34108
LOC101803910	-0.717502	4.67655	0.012864	0.342797
LOC101795860	0.607586	3.88719	0.012931	0.343953
GRHL3	2.18312	-1.59726	0.0130968	0.347261
ENOX1	-0.946916	2.59645	0.0132267	0.349544
LOC101794198	-1.51317	-1.12669	0.0133117	0.351134
MCTP1	-0.608829	3.16517	0.0133394	0.351134
GABRA6	2.62709	-1.9205	0.0133528	0.351134
LOC101792269	2.02614	-1.68169	0.013381	0.351296
ADORA3	-0.861935	1.50587	0.0134347	0.351606
LOC101804690	-1.11047	0.102061	0.0134369	0.351606
LOC101799941	-1.7024	-1.14552	0.0135819	0.354818
LOC101794796	-2.25377	-1.47651	0.0136126	0.355039
MYC	-1.27877	5.32993	0.0136956	0.356247
LRP11	-1.94986	-1.40039	0.013712	0.356247
LRP12	0.617704	5.12437	0.0137445	0.356247
LOC101790076	-1.82101	-1.4833	0.0137481	0.356247
CDCA7	-1.38187	0.929916	0.0137709	0.356257
LOC101796797	-1.62208	-1.22681	0.0137939	0.356275
CCR9	-2.16685	-0.64973	0.0138184	0.356332
LOC101804347	-1.47958	0.17886	0.0138504	0.356581
ATP13A2	-0.655599	5.11372	0.0139918	0.359641
CNTNAP5	1.05511	0.180295	0.0140316	0.360056
USH1C	-2.39571	2.0212	0.0140588	0.360056
ANXA2	0.914514	2.03744	0.0140756	0.360056
FMNL1	-0.673559	3.1657	0.0142451	0.36381
LOC101795904	0.647241	3.7487	0.0143665	0.366323
LOC101801464	1.51522	0.523176	0.0144238	0.366616
NCOA4	0.765913	7.80303	0.0144239	0.366616
PRKCQ	-0.773908	1.85687	0.0144577	0.36689
FAM198B	-0.85746	1.85558	0.0145308	0.368159
UPRT	0.74256	2.0177	0.0145953	0.369207
LAMB2	-0.661274	2.79567	0.0146714	0.370547
LOC101802936	-0.672062	2.35061	0.0147167	0.371104
LOC101797884	-1.27568	-0.416531	0.0148011	0.372642
MCM5	-1.5213	2.9385	0.0149172	0.374974
LOC101801568	1.82163	-1.43739	0.0149837	0.376054
CHRNB4	-1.10759	0.173147	0.0150323	0.37668
ACAD11	-0.585876	6.70949	0.0152821	0.381743
LOC101797138	-0.970066	5.80798	0.0153572	0.382713
UBXN10	0.790599	1.50466	0.0153689	0.382713
SCG2	1.05433	1.66401	0.0155475	0.385955
LOC101797769	1.05271	2.25361	0.0156044	0.386766
GLDC	-1.47461	5.18627	0.0157226	0.389091
LOC101791385	0.795612	5.37183	0.0159113	0.393
CAV2	-1.60888	3.66424	0.0159882	0.393
NRG3	-0.977921	0.343547	0.0160101	0.393
MPP5	0.677531	4.24221	0.0160165	0.393
LOC101802749	3.06385	-2.12489	0.0160322	0.393
LOC101798212	-1.05591	1.25202	0.0160457	0.393
MAD2L1	-0.895841	1.78662	0.0160529	0.393
LOC101800452	-0.78533	1.76585	0.0160831	0.393137
NCKAP5	-0.783783	2.0988	0.0161308	0.393699
RASGEF1A	-0.686904	3.71439	0.0161597	0.393745
ITPR3	-0.709808	2.17018	0.0162267	0.393745
IQGAP3	-1.30442	0.738085	0.0162388	0.393745
LOC101803190	-1.03684	0.628981	0.016256	0.393745
LOC101790011	-0.598937	5.50446	0.0162982	0.39417
CCDC83	-1.58503	-0.792692	0.0163771	0.395478
AK5	1.16045	-0.383825	0.0164267	0.395555
LOC101802899	0.675262	5.01909	0.0164298	0.395555
LOC101790613	3.09739	-2.11266	0.0165475	0.396619
ABCA12	-0.816679	2.59675	0.016548	0.396619
TENM1	-1.64391	0.991579	0.0165486	0.396619
LOC101805454	-0.756338	1.75075	0.0166382	0.397334
LOC101794631	-0.844603	2.41236	0.0166531	0.397334
MYO1G	-0.872007	1.7351	0.0167259	0.398477
LOC101799674	-0.831518	1.40394	0.0167549	0.398571
UNC5C	0.819886	2.17338	0.0168008	0.399068
LOC101798891	-1.11055	0.253934	0.0168932	0.399664
MMP13	2.10966	1.83284	0.016901	0.399664
ERRFI1	-0.76887	4.38887	0.0169397	0.399989
LOC101803665	1.25968	2.17187	0.0169726	0.400173
LOC101798662	-2.73928	-2.02489	0.0170934	0.401529
PCDHAC2	-0.706386	2.83131	0.0171056	0.401529
LOC101805019	-0.726261	2.16347	0.0173365	0.404936
SHCBP1	-1.05185	0.187995	0.0173491	0.404936
BET1	0.725113	4.55697	0.017351	0.404936
LOC101789470	-0.689063	13.2308	0.0173522	0.404936
SERPINA10	0.72348	7.82246	0.0173985	0.405424
TSPAN32	1.24227	-0.584114	0.0174564	0.40618
TDRP	-1.14641	-0.0713324	0.0174821	0.406184
LOC101800403	3.35515	-1.96264	0.017546	0.406673
LOC101799400	-2.34221	-1.43605	0.0175541	0.406673
LOC101801782	-0.655814	5.45893	0.0175829	0.406751
STAP1	-1.99853	-1.36964	0.0177279	0.408921
LOC101795765	-1.38093	-0.581408	0.0177568	0.408996
PPP1R9B	-0.659874	2.86929	0.0178009	0.409422
LOC101791564	-0.969853	0.770624	0.0178724	0.410054
CFH	0.743652	10.2161	0.0179034	0.410054
LOC101795751	-0.872128	2.85648	0.017909	0.410054
LOC101794959	-0.790834	6.00303	0.0180125	0.411324
ABCC4	1.07717	6.1142	0.018094	0.412003
DNAH9	-0.872686	0.724699	0.0181425	0.412003
LOC101792438	-0.894941	1.69578	0.0181662	0.412003
KCNK3	-1.27615	-0.564606	0.0181942	0.412003
TLL1	0.93143	0.197933	0.0181971	0.412003
PRR5L	0.83257	4.47225	0.0182386	0.412357
LOC101790332	0.925023	0.332528	0.0183117	0.412396
FCHSD1	-0.614379	3.79816	0.0183511	0.412396
GABRA2	-1.87992	-1.2111	0.0183604	0.412396
KCTD14	0.742973	1.73576	0.0184181	0.412396
LOC101792203	-0.778985	7.89885	0.0184212	0.412396
TLR3	0.81293	3.91148	0.0184681	0.412857
LOC101798440	1.15776	4.14216	0.0185008	0.412857
LOC101792254	-0.899585	1.19276	0.0185404	0.412857
LOC101791354	-0.959927	1.4217	0.0185746	0.412857
APOD	-0.686297	2.01716	0.0185818	0.412857
CSF1R	-0.641534	5.55946	0.0186226	0.412857
LOC101791226	1.89779	-0.93544	0.0186382	0.412857
LOC101805467	-2.75552	-2.01758	0.0186487	0.412857
ABCG5	-1.05597	4.2237	0.0186909	0.413218
LOC101795624	1.83886	-1.60247	0.0188317	0.415447
TMPRSS13	-4.32289	-2.28255	0.0188777	0.415447
LOC101792463	-2.1772	-1.85365	0.0189624	0.415447
CDK18	0.673471	4.2363	0.0189649	0.415447
LOC101794965	-4.32726	-2.28024	0.0190125	0.415447
LOC101792176	0.585069	5.03655	0.0190945	0.415447
ANKRD22	4.45789	-2.34474	0.0191187	0.415447
HAUS2	0.647473	2.19575	0.0191442	0.415447
SMIM12	-0.584689	4.29728	0.0191683	0.415447
NPHS2	4.27023	-2.41377	0.0191735	0.415447
LOC101790136	4.4641	-2.34198	0.0191771	0.415447
CTLA4	-1.50544	-0.841958	0.019184	0.415447
NWD1	-4.31895	-2.28451	0.0192103	0.415447
KCNJ10	4.28412	-2.40809	0.019225	0.415447
CD80	-0.606704	7.94278	0.019231	0.415447
TSPAN9	0.606731	7.16668	0.0192481	0.415447
LOC101789987	-0.8514	2.06825	0.0192602	0.415447
STAT5B	-0.590351	5.04161	0.0192978	0.415696
LOC101804767	-2.17297	-1.84976	0.0193523	0.41631
CTNNA2	1.65686	-1.3745	0.0194014	0.416523
LOC101795494	-4.32872	-2.27972	0.0194342	0.416523
EDARADD	0.693157	2.405	0.0194405	0.416523
TSPAN15	-1.57249	-1.08813	0.0196325	0.417682
LOC101797328	-0.727945	3.02612	0.0196551	0.417682
TLDC1	0.580766	3.8052	0.01969	0.417682
LOC101790064	2.56434	-1.94313	0.0197012	0.417682
MYBL1	-1.35987	-0.943671	0.019704	0.417682
TCF7	-0.604755	4.82219	0.0197366	0.417819
PARK2	0.627194	3.72733	0.0197714	0.417942
IDI1	0.910225	6.51016	0.0198472	0.418494
DNAJB9	0.610007	4.20055	0.0199464	0.419224
SLC17A8	-4.33218	-2.27848	0.0199606	0.419224
LOC101799378	-1.22335	-0.530084	0.0200992	0.420907
LOC101803223	-2.16923	-1.85156	0.0201535	0.420907
UTP6	0.652442	3.17876	0.020183	0.420907
GRM5	-0.735603	14.6441	0.0201837	0.420907
FRK	1.34921	1.3636	0.0201989	0.420907
GAL3ST2	-4.14975	-2.3517	0.0203121	0.422163
LOC101796047	-4.14975	-2.3517	0.0203121	0.422163
LOC101802020	1.76006	-1.62333	0.0203834	0.422796
GABRA5	-2.97654	-1.90317	0.0204908	0.424221
HUNK	-0.621225	3.16955	0.0205501	0.424897
PLEKHA1	0.850125	4.85304	0.0206761	0.426399
SLC35F4	-1.50167	-0.467818	0.0208418	0.429261
MAMDC4	-0.741745	6.88202	0.0208948	0.429798
LOC101791628	1.76735	-1.62655	0.0209507	0.42984
LOC101805096	2.25766	0.101475	0.0210998	0.430913
LOC101790578	1.51837	-0.98438	0.0211263	0.430913
TMEM243	-0.774999	1.48225	0.0211379	0.430913
LOC101796527	-0.811964	4.36017	0.021165	0.430913
CDK3	-2.44512	-1.69834	0.0212726	0.432072
KCNU1	1.35085	-0.973923	0.021304	0.432089
LRWD1	0.81768	2.88983	0.0215374	0.434984
RGS11	-1.17621	1.38997	0.0215557	0.434984
STOML3	1.0536	3.37226	0.0216053	0.435434
HKDC1	1.02875	2.2421	0.021648	0.43552
LOC101790397	-0.706253	2.81174	0.0217096	0.43552
LOC101789626	-0.625922	3.92335	0.021716	0.43552
FLVCR1	-1.01447	2.2887	0.0217187	0.43552
STK32C	-0.86808	0.470429	0.0217781	0.435617
CD247	-0.83699	2.31437	0.0219263	0.436123
DGAT2	0.714076	4.35919	0.0219302	0.436123
MXRA8	-0.58492	2.86577	0.0219422	0.436123
KIAA1211	0.88706	0.552651	0.0219674	0.436123
LOC101803976	0.759611	12.6325	0.0220372	0.436622
LOC101798033	-0.82065	7.8585	0.022079	0.436622
LOC101796143	-0.728974	2.0514	0.0220924	0.436622
KIF18A	-1.57392	-0.804852	0.0221037	0.436622
PBK	-1.20313	1.13299	0.0221293	0.436622
KIAA0895	0.822687	2.16942	0.0221964	0.437312
LOC101790503	0.925188	4.53084	0.0222847	0.437312
LOC101801264	0.729545	1.93178	0.0223038	0.437312
TRIM67	1.5715	-1.28157	0.0223419	0.437312
SLC35C1	0.589268	3.98877	0.0223905	0.437312
LOC101790952	0.725424	2.53514	0.0224015	0.437312
LOC101800913	-2.27957	-1.2196	0.0224108	0.437312
LOC101803163	-0.861392	0.856018	0.0224494	0.43753
EPHA7	1.46167	-1.00523	0.0225993	0.439875
C7	-0.606205	3.43083	0.0226248	0.439875
LOC101800018	-0.800819	1.95359	0.0226816	0.440443
ETV4	-1.50767	-0.25566	0.0227315	0.440875
TUB	0.924604	0.20368	0.0230033	0.443724
ADTRP	-1.3303	0.884642	0.023021	0.443724
RAB28	0.810851	1.42016	0.0231572	0.443724
PFKFB4	0.790599	2.87456	0.0232335	0.443724
COL28A1	-1.61171	-1.39998	0.0232379	0.443724
LOC101800725	-0.893292	0.656665	0.0232533	0.443724
LOC101803476	-1.03484	5.15679	0.0232675	0.443724
LOC101792029	2.28303	-0.315021	0.0232676	0.443724
ELMOD3	-0.676525	2.69404	0.0234309	0.444954
LOC101791330	0.918699	6.90295	0.0234372	0.444954
CNST	0.662568	3.34743	0.0234404	0.444954
NOXRED1	1.47965	-1.20957	0.0234899	0.444954
RARA	-0.629199	5.61084	0.0234968	0.444954
ABLIM3	-1.10118	1.85589	0.0234993	0.444954
PKP2	-1.04335	2.36356	0.0235867	0.44608
LOC101796586	-1.05904	0.825114	0.0237075	0.447833
LOC101795218	-1.27755	-0.401295	0.0238205	0.448685
TPST2	-0.632516	2.6629	0.0238651	0.448685
LOC101803185	0.997682	-0.0107217	0.0238987	0.44879
PLIN3	-1.69372	-1.14501	0.0240361	0.450634
LOC101801730	1.09612	-0.311043	0.0240991	0.450961
LOC101790407	1.13643	3.36822	0.0241345	0.451094
KIF18B	-1.17942	0.0864756	0.0243286	0.45419
ASIC1	-0.80978	1.22844	0.024536	0.456821
LOC101791800	0.646759	5.16426	0.0247583	0.457356
LOC101792972	-0.980875	0.0616483	0.0247834	0.457356
LOC101804259	-0.650555	2.11534	0.0248151	0.457356
RNF150	-0.59437	3.32096	0.024824	0.457356
MXRA5	-0.662526	3.31387	0.0248822	0.457356
LOC101792255	0.749829	1.57297	0.0249457	0.457356
CALHM2	-0.910666	0.79098	0.024957	0.457356
HMGCS1	0.718864	8.22555	0.0249876	0.457356
PSAT1	-0.633843	7.45376	0.0250151	0.457356
ATHL1	-0.766186	5.58626	0.0250426	0.457356
DTL	-1.29622	0.524084	0.0251435	0.458506
LOC101790195	1.39445	1.25483	0.0253399	0.460679
LOC101790384	-1.50529	-1.11446	0.0255841	0.463365
MMRN1	-1.48412	0.0666247	0.0256038	0.463365
POLE	-1.46183	1.7259	0.0256343	0.463392
LOC101804743	0.665391	2.13984	0.0259255	0.467069
NLRC3	-0.830867	1.88395	0.0259765	0.467333
CLDN10	1.05377	-0.339738	0.026001	0.467333
WDR88	-1.21484	-0.840043	0.0261434	0.468728
LOC101803634	-1.08527	1.94085	0.0261644	0.468728
LOC101799714	0.625472	4.40448	0.0262737	0.47008
LOC101798396	-0.612912	2.40103	0.0265443	0.472669
IL18	0.909424	0.541977	0.0265958	0.472669
LOC101789568	-0.70241	10.849	0.02661	0.472669
ADAMTSL1	1.41995	-0.849362	0.0266634	0.472669
CCDC103	-0.834292	0.560306	0.0266805	0.472669
MITF	-0.684242	3.05572	0.0267675	0.473684
LOC101795849	-1.21978	1.18559	0.0268839	0.474965
LOC101794492	1.89876	-0.114911	0.0268994	0.474965
GJA4	0.64638	2.2885	0.0269852	0.475954
LOC101790941	-0.751428	2.15751	0.027028	0.476116
LOC101804095	1.2214	5.59327	0.0270541	0.476116
LAMA3	-0.862553	2.76247	0.0271668	0.47687
LOC101796796	0.632292	3.97575	0.0271765	0.47687
ARHGEF10	-0.662419	2.38927	0.0271866	0.47687
TMEM130	1.29699	-0.530435	0.0272343	0.476942
PLA2G1B	1.52184	-1.18457	0.0272785	0.476942
ALAS1	-0.640203	6.4146	0.0273102	0.476942
PDZD9	-2.07925	-1.2774	0.0273688	0.477444
LOC101803005	0.708493	3.09007	0.0274282	0.477958
CAT	-0.593395	9.54845	0.0274967	0.47854
COL18A1	-0.615801	5.86127	0.0275277	0.47854
C8A	0.633573	8.70029	0.0275652	0.47854
UBASH3A	-0.901875	1.25664	0.0275816	0.47854
OXSM	0.650017	2.61512	0.0276324	0.478902
LOC101789395	-2.61355	-2.08251	0.0277135	0.479028
PLXDC1	-0.708845	2.12839	0.0277231	0.479028
ITGAE	-0.82722	1.22272	0.0277298	0.479028
PIEZO1	0.759991	5.67712	0.0278196	0.479417
ME3	1.03675	0.0141666	0.0278308	0.479417
PITX2	0.829321	2.78872	0.0278423	0.479417
LOC101799349	-1.15259	0.734808	0.0280081	0.481752
LOC101795107	-2.62199	-2.07803	0.0280451	0.481869
CCDC169	2.90803	-2.19228	0.0280775	0.481907
LOC101795924	-0.627104	3.49785	0.0283507	0.485551
PYCRL	-0.667291	4.13519	0.0284783	0.485938
LOC101794948	0.865687	0.343323	0.0284877	0.485938
FAM228B	-1.49312	-1.29915	0.0284951	0.485938
MPO	-1.08235	-0.238334	0.0285864	0.486976
LOC101796964	1.47066	-0.984761	0.0286638	0.487644
LOC101803475	-0.736938	2.35388	0.0287122	0.487644
MSMO1	0.891162	7.64819	0.0287173	0.487644
MKNK2	-0.643789	4.89773	0.0288678	0.488675
FAM69B	1.15835	-0.328123	0.0289394	0.488675
LOC101793730	-1.99779	4.27186	0.0289474	0.488675
CD40LG	-0.930289	0.133046	0.0289617	0.488675
GPR143	1.33849	0.0723996	0.0290355	0.489403
SH3BGR	-0.823369	3.74903	0.029363	0.494401
NQO2	-1.0338	2.33779	0.0294762	0.495616
LOC101797895	-1.71191	-1.33066	0.0295309	0.49566
LOC101790368	-1.792	-1.47565	0.0296073	0.49572
ITIH5	-0.605852	3.15123	0.0296112	0.49572
PCDHAC1	-1.81929	-0.16306	0.0296393	0.49572
TNFRSF13B	-1.37989	-1.05785	0.0296588	0.49572
HYOU1	0.599736	7.11911	0.0296908	0.495737
RASGRF2	1.67943	-1.50035	0.0297361	0.495975
ANGPTL4	0.897605	7.57752	0.0298289	0.497003
LOC101801179	-1.02336	0.511331	0.0300427	0.499522
LOC101802055	-1.66088	-1.35951	0.0303999	0.503756
MYH7B	0.622946	2.86664	0.0304105	0.503756
CHRD	-0.945183	0.0693708	0.0304236	0.503756
LOC101804974	-0.705012	7.17403	0.030618	0.504943
MAML3	-0.761879	4.89993	0.0306218	0.504943
PIBF1	0.790368	0.998843	0.0306644	0.505125
MREG	-1.20522	1.12115	0.0307417	0.505288
COLEC12	0.717466	0.96806	0.0307624	0.505288
RP2	0.587955	4.59846	0.0307693	0.505288
FHL1	0.942052	2.15037	0.0308388	0.505706
WNT9A	-0.939244	0.922313	0.0309022	0.505706
ARMC12	-2.0694	-1.90508	0.0310665	0.507039
LOC101791124	-2.07099	-1.90424	0.0311003	0.507071
GRIA3	1.83914	-1.77395	0.0312388	0.508567
LOC101799527	1.41411	-0.942368	0.0312558	0.508567
GPR98	-0.831248	1.16286	0.0314687	0.51151
LOC101804420	1.84601	-0.0546979	0.0315196	0.511818
DGKI	1.82889	-1.77422	0.031658	0.512376
NTSR1	2.42364	-2.00644	0.0317029	0.512376
IGF2BP3	0.748062	3.28143	0.0317292	0.512376
GPATCH4	-0.624616	3.33393	0.0317988	0.512376
PPAPDC3	-0.724378	1.25368	0.031812	0.512376
LOC101802274	-1.3867	3.69491	0.0318429	0.512376
CD2	-0.675639	2.35553	0.0320246	0.514262
LOC101793964	-0.795698	1.63302	0.0321854	0.516214
LOC101802752	-0.79788	0.915349	0.0322374	0.516214
LOC101802222	-1.8655	-1.69955	0.0322495	0.516214
POPDC3	1.6832	-1.50766	0.0323165	0.516353
NINL	-0.658225	2.22777	0.0324111	0.517346
RBP7	-2.04894	1.96948	0.0325823	0.518833
ITGB5	-0.583367	6.72085	0.032588	0.518833
LOC101805383	1.03411	-0.0708692	0.0326018	0.518833
LOC101793645	-0.783279	6.92971	0.0326843	0.519239
BRAT1	0.661888	2.61439	0.0327085	0.519239
CNRIP1	-0.750715	0.869523	0.0327249	0.519239
LIPG	1.40808	0.732662	0.0328866	0.520799
LOC101793748	-1.07282	3.42853	0.0328885	0.520799
LOC101790495	-1.30297	3.4637	0.0330412	0.522699
FAM78A	-0.580531	3.18994	0.0332088	0.523731
LOC101798594	0.838527	0.451879	0.0332377	0.523731
CLDN11	2.91551	-2.18842	0.0334082	0.525861
NKAIN2	1.81889	-1.5992	0.0334878	0.525861
LOC101794547	1.0716	2.2333	0.0335046	0.525861
LOC101790259	-0.722164	7.33963	0.0336547	0.527697
AOX1	1.64133	7.26198	0.033696	0.527826
LOC101802780	-1.23823	3.78937	0.0339486	0.531262
GH1	0.691462	2.63544	0.034042	0.531526
RFC4	0.716591	2.88556	0.0340729	0.531526
LOC101804234	1.23097	-0.796232	0.0340987	0.531526
KLF11	0.581467	5.64419	0.0341583	0.531937
LOC101793886	-0.638722	4.28575	0.034263	0.533046
DLX5	-2.59279	-2.08802	0.0344124	0.53485
LOC101804039	-1.04427	0.0566342	0.034714	0.538489
LOC101804666	-0.648802	9.57735	0.0347812	0.538921
LOC101802553	-1.75122	-0.396941	0.0348838	0.539549
SCARF1	-0.609902	1.83966	0.0349564	0.540149
FABP7	-0.693772	3.74582	0.0351424	0.541451
RUFY2	0.811866	4.21522	0.0353391	0.543721
LOC101797270	0.620388	1.98034	0.0353579	0.543721
VPS13B	0.637052	6.03117	0.0354287	0.543786
AIF1L	-0.612506	2.97522	0.0355757	0.543786
KLF5	1.03351	-0.195018	0.0356329	0.543786
VAT1L	-0.767383	0.805934	0.0356644	0.543786
DTWD1	0.716598	2.33461	0.0356772	0.543786
HTR1F	1.17989	-0.826094	0.0357249	0.543786
LOC101801703	-0.588434	2.55264	0.0358112	0.543786
LOC101799537	1.03566	-0.208291	0.0358204	0.543786
LOC101799248	-4.1419	-2.35473	0.0358483	0.543786
MAMDC2	-0.783252	0.498289	0.0358808	0.543786
FER1L6	4.02102	-2.49804	0.0358908	0.543786
LOC101797406	-0.858154	3.73659	0.0359519	0.543786
NMRK2	1.11874	6.04156	0.0359596	0.543786
LOC101789587	-4.13748	-2.35706	0.0359748	0.543786
LOC101801099	-4.14467	-2.3533	0.0360292	0.543786
LOC101801556	-1.03684	0.362075	0.03603	0.543786
LOC101804071	-1.07766	2.016	0.0360435	0.543786
LOC101798818	4.25146	-2.42188	0.0360952	0.544052
LOC101792995	-4.13703	-2.35723	0.0361519	0.544393
LOC101790959	-2.06237	-1.91568	0.0362391	0.545191
E2F1	-1.19515	1.21255	0.0363164	0.545575
IRF4	-0.8796	0.563988	0.036334	0.545575
DUSP5	-0.600152	1.93412	0.0363695	0.545575
LOC101799827	-1.02508	0.596531	0.0364013	0.545575
LOC101792315	-3.9382	-2.42926	0.0365132	0.546551
TFCP2L1	0.758832	3.56788	0.0365777	0.546551
LOC101791565	-1.2638	-1.00426	0.0366948	0.546551
FAM101A	-1.2406	-0.529774	0.0367178	0.546551
KCNAB2	-0.626697	1.95306	0.0367743	0.546551
UNC5D	-0.647693	2.2479	0.036825	0.546551
LOC101802774	-4.14367	-2.35399	0.0368545	0.546551
CASQ2	-1.45034	-0.992488	0.0368623	0.546551
DNAH8	1.07289	-0.326594	0.0368689	0.546551
KLHL32	-4.14597	-2.35295	0.0368773	0.546551
LOC101800265	-4.14597	-2.35295	0.0368773	0.546551
CENPF	-1.14327	1.25093	0.0370133	0.546811
MYBPC1	4.22709	-2.43021	0.0370192	0.546811
LAMA1	-1.88329	0.0609816	0.0370451	0.546811
PLAT	0.786827	0.933228	0.0370661	0.546811
LOC101797756	-3.93925	-2.42908	0.0371717	0.547501
LOC101793213	1.07445	-0.67167	0.0371815	0.547501
GP5	-0.873266	0.68477	0.0373357	0.548949
LOC101794061	0.835404	1.21447	0.0374006	0.548949
UROC1	-0.864267	5.37138	0.0374081	0.548949
ARVCF	-0.771884	2.61524	0.0374207	0.548949
ATP6V0A4	4.06413	-2.4842	0.0376065	0.550206
LOC101791038	1.35059	-1.16804	0.0378005	0.55217
DRP2	-0.923509	0.030209	0.0378445	0.55217
GAB2	-0.628846	1.73592	0.0379149	0.552445
LOC101795502	-0.764976	1.19341	0.0379326	0.552445
GPX1	-0.891032	8.68953	0.0381106	0.55365
AURKA	-1.08839	0.234826	0.0381194	0.55365
SPAG1	0.752717	0.621047	0.0382307	0.554259
LRGUK	1.34068	0.694883	0.0383866	0.555007
FGFR1	-0.629228	1.75075	0.038484	0.555696
SERPINI1	0.917648	2.93762	0.0385039	0.555696
UBL7	-0.589739	5.39604	0.038712	0.557691
RADIL	-1.08794	0.029213	0.0388291	0.558872
PPM1H	-0.685172	1.8386	0.0389878	0.560147
METTL18	0.611335	2.71746	0.039028	0.560221
TEKT3	-1.35493	-1.36696	0.0390909	0.560619
LOC101805398	0.889031	1.63991	0.0391566	0.561057
LOC101791248	-1.11186	4.35377	0.039271	0.561361
CCBE1	-0.620817	3.10781	0.0393276	0.561361
CMYA5	1.1455	-0.554089	0.0393536	0.561361
LAMP3	0.588328	3.71475	0.0394981	0.562919
LOC101801051	-1.65367	-1.35683	0.0395663	0.563387
LOC101803625	-1.13167	-0.522826	0.0397023	0.564123
LOC101797856	-1.31485	-1.08367	0.0397458	0.564123
LOC101792296	-0.595708	2.12538	0.0398165	0.564123
DYNC1I1	-0.613453	1.95984	0.0398653	0.564123
SLC13A5	1.84249	-1.61478	0.0399383	0.564651
DOK5	2.20534	-0.227775	0.0399734	0.564651
UHRF1BP1L	0.597961	2.63689	0.0402098	0.566987
GEM	-0.637404	3.2726	0.040322	0.568067
SAMD12	0.635341	2.44772	0.0405587	0.56812
LOC101800398	-0.770562	0.865219	0.0405898	0.56812
TRIM54	-0.967308	-0.236347	0.0406632	0.56812
TMEM260	0.621161	2.05265	0.040676	0.56812
MRP63	-0.75041	1.32628	0.0406817	0.56812
LOC101790572	-0.653422	4.49951	0.0408479	0.568948
MICU2	0.599389	3.9469	0.041058	0.570692
LOC101793778	-0.62912	4.49037	0.0411465	0.570713
LOC101802526	-0.977493	-0.21284	0.0411534	0.570713
IL2RB	-0.69059	1.94149	0.0411994	0.570856
LOC101801952	-0.699272	1.43932	0.0413381	0.571813
LOC101793635	-0.695387	2.06939	0.0417874	0.575779
LOC101795238	-0.584735	2.40778	0.0418775	0.575779
TIFA	0.72691	1.72983	0.0418791	0.575779
LOC101799189	1.6978	-1.47265	0.0418794	0.575779
MTMR7	0.975538	4.58845	0.042117	0.578546
METTL21D	-0.592471	2.43538	0.0421626	0.578675
LOC101797323	-1.37029	2.97592	0.0422735	0.579202
LOC101792496	1.04848	3.91068	0.0424059	0.579329
SCNM1	-0.634003	2.43487	0.0424496	0.579329
PDIA4	0.706024	8.32739	0.0425006	0.579329
SPAG16	-1.74055	-1.52075	0.0426955	0.580498
LOC101794290	-0.676569	2.63946	0.0427442	0.580667
ATIC	-0.631744	12.2506	0.0428805	0.58193
PATZ1	-0.676431	1.31988	0.0429102	0.58193
SH2D1A	-0.764739	1.06236	0.0432324	0.585802
LOC101802007	-1.45551	-1.4805	0.0432692	0.585803
ASCL4	-1.13406	-0.85422	0.0434956	0.587872
PRPSAP2	-0.837938	4.8314	0.0436138	0.588101
LOC101801820	-0.694588	1.32997	0.0436865	0.588101
LOC101796840	0.811317	0.226465	0.0437462	0.588101
LOC101790404	0.588833	2.54462	0.0437477	0.588101
SLC22A13	-0.616246	3.28603	0.0438154	0.588101
TMED3	0.742681	3.58722	0.0438299	0.588101
SLC2A2	-0.631598	9.22723	0.043846	0.588101
ALDH1L2	0.646128	5.84854	0.043881	0.588101
ITM2C	-0.787266	0.389944	0.0441095	0.590173
SLC34A2	1.07768	-0.420448	0.0445382	0.592552
LOC101789589	0.971957	2.92088	0.0445843	0.592552
GOLPH3L	0.624172	2.40884	0.0447841	0.594712
ADA	-0.638832	1.75831	0.0450965	0.595302
LOC101797169	-0.76778	0.571614	0.0451499	0.595302
CCDC40	0.594417	1.79053	0.0452506	0.595302
MEI1	-0.981766	0.107971	0.0452512	0.595302
TSPAN12	0.643708	5.24495	0.045271	0.595302
KMO	-0.85216	5.80154	0.0452967	0.595302
LOC101790444	-0.679339	1.03587	0.0453133	0.595302
LOC101797208	-1.58734	-1.21522	0.0454674	0.596367
KCND2	0.740576	1.61851	0.0454692	0.596367
LOC101790341	-0.785568	0.596363	0.0455946	0.597031
FADS2	0.899731	10.7325	0.0459274	0.598398
LOC101795563	-1.19553	-0.406655	0.0461045	0.599536
LOC101802712	-0.629502	1.81533	0.046222	0.599536
LOC101803280	0.705579	0.939883	0.0462517	0.599536
LRRC38	-1.18789	-1.06049	0.0462832	0.599536
VAT1	0.867627	5.83976	0.0464125	0.599536
LOC101793987	-0.615254	2.16714	0.0464218	0.599536
LOC101793821	-1.74347	-1.51969	0.046448	0.599536
CRTAM	-0.970191	0.752943	0.0466497	0.599536
LOC101796459	-1.46113	-1.47916	0.046755	0.599923
PYROXD2	-0.750326	4.12905	0.0470288	0.602289
ARHGAP28	-0.618262	2.49916	0.0470526	0.602289
LOC101804815	-0.839208	0.347033	0.0473279	0.604115
LOC101798714	-0.685163	4.43702	0.0473453	0.604115
LOC101800222	2.73199	-2.25806	0.0474433	0.604864
ALKBH4	0.661141	2.05874	0.0475128	0.605267
LOC101798584	2.72013	-2.26342	0.0475977	0.605865
AKAP6	-2.48302	-2.14408	0.0476878	0.606063
KCNMB2	-2.47469	-2.14844	0.0476961	0.606063
PSD3	-0.63235	3.56517	0.0477272	0.606063
LOC101796573	-0.599027	3.43705	0.0477757	0.606197
KCNJ11	-0.655601	5.11593	0.0478189	0.606263
VASH2	-0.682328	3.03015	0.0479329	0.606895
LOC101796841	-0.81951	0.303659	0.0480169	0.606895
LOC101802461	-1.36642	-1.18597	0.0480449	0.606895
EXOC3L4	0.623644	6.61553	0.0480608	0.606895
APBB3	-1.05391	-0.45896	0.0480877	0.606895
LECT1	-2.46493	-2.14697	0.0480969	0.606895
LOC101797553	-0.767405	1.84907	0.0482441	0.607997
KIF6	-1.37057	1.30884	0.0484117	0.608436
BMX	2.88531	-2.19927	0.0485143	0.608436
LOC101801165	-1.41425	-1.32412	0.0485275	0.608436
ADAD1	-0.663174	1.42641	0.0485434	0.608436
LOC101797390	-0.652602	1.23074	0.0486214	0.608436
STAT4	-0.65387	2.13933	0.0486718	0.608436
LOC101798651	0.988326	3.14996	0.0487357	0.608436
SH3BP1	-0.681688	2.4673	0.0488101	0.608436
LOC101798090	-0.847669	0.306108	0.0488428	0.608436
RPL22L1	0.622603	7.4106	0.0489377	0.608436
GRID2IP	1.69463	-1.83374	0.0490611	0.609427
TRPV3	-2.4836	-2.14459	0.0492592	0.61079
LOC101803793	1.69627	0.131539	0.049316	0.61079
LOC101803430	2.87015	-2.20464	0.0493239	0.61079
PGR	-0.770905	0.801712	0.049489	0.611258
LGALS3	1.03236	0.876877	0.0495394	0.611258
AATK	0.853443	0.199053	0.0495946	0.611258
CBFA2T2	-0.653766	1.28012	0.0496815	0.611258
LOC101794784	-1.94555	-1.96213	0.0497564	0.611258
TECTA	-0.713378	1.43449	0.0497581	0.611258
NCF2	0.582433	2.38942	0.0497912	0.611258
CLIC3	-1.94904	-1.96026	0.0498213	0.611258
ASB11	-1.95021	-1.96592	0.0498989	0.61174
LOC101797095	2.4274	-2.0076	0.0499424	0.611804

## Sheet: Pair-F vs Thr-S
Supplemental Table 3B
Gene	logFC	logCPM	PValue	FDR
LOC101801253	-1.75902	14.2501	5.68664e-14	9.07702e-10
LOC101795926	2.10205	1.68421	1.52963e-10	1.14192e-06
LOC101799608	-1.6202	7.30816	2.1462e-10	1.14192e-06
KCNK3	-4.09037	-0.97151	1.41386e-08	5.64202e-05
GRM5	-1.05383	14.5236	1.2057e-07	0.000349772
LOC101789470	-0.970783	13.1201	1.31477e-07	0.000349772
SLC5A11	-1.9718	0.72431	2.29523e-07	0.000523379
SLC23A1	-1.2258	2.67349	2.75018e-07	0.00054873
LOC101795218	-3.11181	-0.751445	3.60827e-07	0.000639946
LOC101805352	-4.43964	-1.32344	4.88106e-07	0.000723843
LOC101802899	1.04246	5.24663	4.98827e-07	0.000723843
ABCG1	-1.2841	2.50632	7.84867e-07	0.001044
LOC101796573	-1.26889	3.19519	1.27987e-06	0.00157148
LOC101791847	-1.79809	4.3574	3.2944e-06	0.00375608
LOC101800665	-1.63043	3.99206	4.4311e-06	0.00444616
LOC101797535	-2.12021	0.517267	4.45674e-06	0.00444616
LOC101801882	-3.26782	0.622635	5.23589e-06	0.00491619
LOC101800394	-1.703	1.09103	6.4325e-06	0.00537249
NQO2	-1.37492	2.21059	6.70846e-06	0.00537249
LOC101805065	0.981318	3.72779	6.7316e-06	0.00537249
LOC101797047	-1.25871	2.06459	9.46256e-06	0.00719245
IFI30	-1.04374	4.35459	1.03591e-05	0.00732529
LOC101791640	-4.19661	1.11382	1.05552e-05	0.00732529
NOXRED1	2.57481	-0.519886	1.20878e-05	0.00803939
LOC101803862	-1.21686	1.40895	1.652e-05	0.0105477
ROS1	-2.76243	0.455358	2.10286e-05	0.01291
STPG1	1.28431	2.54157	2.5701e-05	0.0141121
PRR11	-1.9322	0.167496	2.58422e-05	0.0141121
ESYT3	-3.35143	-1.11126	2.59074e-05	0.0141121
PRDM14	-1.39734	1.94156	2.65232e-05	0.0141121
LOC101799912	-2.0819	-0.583386	2.75033e-05	0.0141615
LOC101797502	-1.27695	9.17534	3.10714e-05	0.0154988
PRKCE	-1.82778	3.8039	3.36196e-05	0.0156647
LOC101804178	1.9579	0.135867	3.40452e-05	0.0156647
CLDN3	-1.47309	2.66148	3.49636e-05	0.0156647
PBK	-2.5073	0.824749	3.53295e-05	0.0156647
LOC101794992	-1.92838	0.160411	4.19245e-05	0.0180864
DRP2	-1.81974	-0.235254	5.02863e-05	0.0211229
DSG2	-1.50382	1.91246	5.38217e-05	0.0220283
PLD5	-3.84745	-1.16084	5.61321e-05	0.0223995
LOC101804351	-1.62798	0.214231	6.38494e-05	0.0248576
LRRC26	-1.52219	1.11041	6.67676e-05	0.0251324
IFT57	-0.923077	2.7598	6.7704e-05	0.0251324
LOC101793532	5.46574	-1.94199	7.49761e-05	0.0267785
LOC101791390	-1.43224	1.37784	7.60262e-05	0.0267785
UPP1	1.87358	-0.480043	7.71716e-05	0.0267785
LOC101798115	2.99889	-1.38994	8.09267e-05	0.0274102
CCDC41	0.91813	3.26016	8.24265e-05	0.0274102
HTR1F	2.19817	-0.177212	8.42607e-05	0.0274484
LOC101800797	-2.50529	-1.16925	8.99043e-05	0.0287011
SLC35F4	-2.44861	-0.703542	9.39973e-05	0.0294193
TRIM3	-0.841953	11.606	0.000103612	0.0313331
DNAH1	-3.11336	-0.0625706	0.000104038	0.0313331
LOC101797677	-4.87416	1.13794	0.000117972	0.0348718
IL11RA	-1.24812	3.95782	0.000124301	0.0360743
COL9A2	-1.58255	1.59152	0.000131289	0.0374221
LOC101804071	-2.50032	1.67486	0.000134428	0.0376446
CCDC103	-1.62431	0.307142	0.000138627	0.0376859
HYI	-0.867576	5.2275	0.00014136	0.0376859
VWA3A	1.65238	0.242047	0.000143483	0.0376859
CKAP2	-1.91309	0.908554	0.00014402	0.0376859
LOC101803940	-1.07585	2.10607	0.000180974	0.0463708
MPND	-2.61863	-0.730868	0.000184721	0.0463708
FA2H	-0.853113	4.83416	0.000188812	0.0463708
VAT1	0.915943	5.86163	0.000190052	0.0463708
KIAA1244	-1.69757	0.109848	0.000191735	0.0463708
PLP1	-1.55335	3.63096	0.000200977	0.0478805
LOC101795502	-1.28774	1.00145	0.000215102	0.0486677
ASIC1	-1.15745	1.09039	0.000215139	0.0486677
TBX15	-5.34464	-1.9957	0.000215323	0.0486677
CD80	-1.18841	7.7301	0.000220093	0.0486677
LOC101798019	-1.33662	7.76998	0.00022174	0.0486677
EPCAM	-1.33679	0.9091	0.000222575	0.0486677
LOC101791700	-1.21133	1.44166	0.000229112	0.0489773
CHRD	-1.5083	-0.124937	0.000230128	0.0489773
LOC101789568	-0.885047	10.7732	0.000245993	0.0515344
SLC37A2	-1.04596	3.77224	0.000252273	0.0515344
LOC101804825	-1.90812	0.678386	0.000253215	0.0515344
EPPK1	-1.09666	1.91971	0.000256227	0.0515344
LOC101795366	-1.2791	0.845654	0.000258286	0.0515344
FLVCR1	-1.20931	2.20386	0.000265893	0.0523973
LOC101803936	-2.36563	-1.07553	0.000293446	0.0566268
PLK1	-1.32546	1.70272	0.000294451	0.0566268
LOC101800054	-0.857343	4.25116	0.000314614	0.0586698
LOC101798363	-1.86623	-0.72826	0.000318096	0.0586698
TMEM67	2.24485	1.84802	0.000319537	0.0586698
CLCN4	1.81038	-0.286871	0.000319777	0.0586698
FANCC	-3.63103	-1.8436	0.00033549	0.0608532
LOC101791248	-1.12863	4.33462	0.000350843	0.0623291
CD3E	-0.943134	2.95914	0.000354042	0.0623291
KIF18A	-2.22846	-0.996373	0.000355341	0.0623291
ARHGAP19	-1.26153	2.6632	0.000369063	0.0640324
A2ML1	-0.9695	9.19431	0.000379802	0.0651872
GPR162	-1.3097	0.579861	0.000393083	0.0661547
LOC101798333	0.793654	5.04473	0.000393729	0.0661547
BHMT	-0.739967	11.1735	0.000404856	0.0673157
SLC51A	-0.859165	5.82788	0.000426082	0.0701147
PAQR9	-0.931103	4.20855	0.000442661	0.0718428
LOC101796910	-0.725275	7.33197	0.000445585	0.0718428
LOC101794808	-1.81775	1.30089	0.000493639	0.0787946
LOC101798404	-0.752561	3.79638	0.000515491	0.0806319
DNER	-1.39527	0.758243	0.0005194	0.0806319
LOC101796586	-1.71059	0.617698	0.000525602	0.0806319
LOC101803580	-2.62041	0.102189	0.000538886	0.0806319
LOC101793153	-1.54202	0.00703522	0.000539492	0.0806319
LOC101803941	-0.679831	7.38766	0.000541897	0.0806319
ERCC6L	-1.885	0.247193	0.000543896	0.0806319
LOC101794757	-2.09384	-1.08114	0.000545561	0.0806319
ERCC8	0.771568	4.34281	0.000555825	0.080766
ZBTB16	1.32127	3.94358	0.000556588	0.080766
LOC101791646	-2.38167	0.715567	0.000570552	0.0820464
PTCHD1	-1.0768	1.90625	0.000582679	0.0825165
TMCO6	-1.52534	2.73646	0.00058416	0.0825165
TOP2A	-1.44587	2.77854	0.000591709	0.0828496
RYR3	0.843425	3.72899	0.000602238	0.0835907
LOC101805313	-2.05545	-1.10704	0.000614616	0.083776
MUC13	-3.12451	1.22735	0.000614712	0.083776
SMYD3	0.945429	2.63702	0.000619319	0.083776
MAST3	-0.866316	2.79354	0.000634975	0.085172
LOC101803723	-1.53898	-0.0471344	0.000646909	0.0860496
OGFOD1	-1.05029	5.04053	0.00067012	0.0874993
ABHD11	-1.14221	3.14859	0.000671763	0.0874993
LOC101803486	-1.69152	-0.559993	0.000674252	0.0874993
TDRP	-1.46737	-0.211101	0.000682801	0.0878941
LOC101803733	-5.11455	0.936479	0.000726872	0.0928187
LAMC2	-1.58835	-0.32423	0.000734817	0.0928852
SEMA4A	-0.884917	2.63878	0.000739032	0.0928852
KIF18B	-1.72645	-0.0968897	0.000760575	0.0945252
LOC101805198	-2.28775	0.692314	0.000771132	0.0945252
DNAH11	1.82125	-0.703128	0.000780813	0.0945252
LOC101803170	-1.1943	3.01019	0.000785241	0.0945252
FRMD6	-0.77126	3.55338	0.000786296	0.0945252
CRTAM	-1.4921	0.572966	0.000791505	0.0945252
RARA	-0.822947	5.52697	0.000793534	0.0945252
TK1	-1.0905	2.29666	0.000806689	0.0948972
LOC101799407	-5.02693	-2.16661	0.000812829	0.0948972
LOC101798079	-1.55213	-0.343918	0.000819277	0.0948972
CENPN	-2.5461	-1.14009	0.000820437	0.0948972
HEXA	-0.953032	5.55061	0.000861686	0.0986538
LOC101798818	5.06088	-2.16503	0.000865734	0.0986538
GLA	-0.788261	3.12524	0.000873308	0.0986538
FASLG	-1.63488	-0.510863	0.000877637	0.0986538
TCN2	-0.827678	5.75086	0.000901449	0.100622
LOC101801601	-2.20157	-1.00643	0.000911238	0.101008
CENPF	-1.68573	1.07319	0.000938195	0.102375
LOC101795567	-0.70798	4.0246	0.00094899	0.102375
ALPK2	-1.26746	2.96784	0.000950695	0.102375
LOC101801846	-3.45204	-1.94392	0.000954459	0.102375
POLQ	-1.50768	0.228861	0.000955633	0.102375
ANGPTL5	3.51818	-1.94148	0.000965644	0.102757
LOC101802256	-2.02581	-0.416497	0.000984057	0.104023
LOC101798594	1.09038	0.602187	0.000994788	0.104466
LOC101804090	-1.60546	-0.00559486	0.00105466	0.110029
KHDRBS3	0.824606	4.99397	0.00106652	0.110544
LOC101803926	-1.84024	-0.968634	0.00108561	0.111797
LOC101803470	-0.746851	2.58305	0.00109962	0.112513
LOC101793161	-0.655458	5.0176	0.00112417	0.113641
NXPH4	-2.84432	-1.43963	0.00112488	0.113641
PINK1	-1.04671	5.32109	0.00114436	0.114883
R3HDML	-2.37036	1.13798	0.00118875	0.117793
LOC101793007	-1.63995	0.128638	0.00119161	0.117793
HS3ST6	-1.67725	-0.847193	0.00119549	0.117793
OLFML2B	-1.78349	2.87924	0.00120455	0.117957
SORBS2	0.835575	5.75162	0.00121382	0.11814
LOC101794765	-1.17817	0.585886	0.00123523	0.119496
LOC101797315	1.37631	0.720089	0.00126754	0.121883
LOC101802712	-1.16573	1.61228	0.0013657	0.130022
FOXRED2	-0.836509	1.74098	0.00136848	0.130022
MAP3K7CL	-1.22525	1.91136	0.00142098	0.133225
LAMC3	-0.982408	5.46393	0.0014303	0.133225
LOC101799323	-1.95713	-1.16598	0.00143682	0.133225
FMNL1	-0.986194	3.04005	0.00144204	0.133225
LOC101798212	-1.32568	1.13764	0.00144624	0.133225
PTPRR	1.55227	1.1351	0.00147642	0.133225
EDA	-0.908193	2.19505	0.00147697	0.133225
PRICKLE2	-1.43092	-0.356872	0.00150413	0.133225
LOC101794709	6.728	0.536755	0.00150951	0.133225
LOC101790341	-1.14852	0.444094	0.0015114	0.133225
KPNA2	-1.61826	1.91385	0.00151613	0.133225
NDUFC2	-0.776764	6.80829	0.00151827	0.133225
LOC101804154	-0.654107	10.5844	0.00152191	0.133225
LOC101791321	-0.955359	1.20317	0.00152485	0.133225
TRPM6	-1.4063	-0.309464	0.00153444	0.133225
LOC101798662	-4.89667	-2.23184	0.00153573	0.133225
MRP63	0.980084	2.16479	0.00155059	0.133732
PID1	0.869915	1.89576	0.00155834	0.133732
LOC101799367	0.955553	5.16507	0.00156933	0.133955
RBM43	0.698898	3.94406	0.0015831	0.134412
LOC101805062	-1.5265	-0.581234	0.00159179	0.134435
PHACTR3	2.90304	-1.79448	0.00162119	0.136197
LOC101795641	-1.7978	-0.876571	0.00169701	0.140822
LOC101795898	-4.91417	-2.22478	0.00170861	0.140822
LOC101793966	-4.90674	-2.22753	0.00170942	0.140822
LOC101794290	1.38314	3.75751	0.00171992	0.140822
LOC101795849	-1.49346	1.06807	0.00172566	0.140822
LOC101791437	-1.60321	0.1957	0.00172918	0.140822
LOC101792176	0.717927	5.10858	0.00174411	0.140997
PRUNE2	-3.35571	-1.99635	0.00175806	0.140997
TBC1D8	-0.719652	3.33202	0.00175956	0.140997
LOC101797986	-1.61674	-0.692186	0.00177186	0.140997
RBP7	-3.24033	1.77101	0.0017755	0.140997
EFNA3	-1.3384	0.0666563	0.00178475	0.14103
LOC101800982	-2.05957	-0.954935	0.00181926	0.14305
BTBD17	-0.93987	1.08564	0.00183377	0.143483
SLC23A3	-1.82918	0.932894	0.00187513	0.146004
LOC101790368	-2.48149	-1.66661	0.00190063	0.147271
TFDP2	-0.963166	2.81195	0.00192057	0.147505
COL17A1	-1.74812	-1.0265	0.00192213	0.147505
AFP	-1.10166	3.8325	0.00198674	0.151734
KCNMB4	3.41943	-1.99305	0.00200125	0.152114
LOC101802412	-2.43247	7.66615	0.00204437	0.15402
PCSK1	4.44629	-1.35864	0.00204563	0.15402
MORC4	0.83334	2.46755	0.00213668	0.159389
SLC20A1	-0.658019	6.80881	0.00213691	0.159389
LOC101801165	-2.25381	-1.54229	0.00217077	0.160589
LOC101789716	-0.876289	1.96784	0.00217312	0.160589
ABCB6	-0.744991	2.92975	0.00220372	0.1621
RASL12	-0.777581	3.51969	0.00221893	0.16247
LOC101789528	-1.28775	1.91571	0.00226164	0.164605
FGF1	-1.11968	0.457356	0.00226871	0.164605
LOC101803753	-0.744128	7.10065	0.00231364	0.167106
SARDH	-0.700614	7.68659	0.00233057	0.16757
LOC101801306	3.4147	-1.99462	0.00236267	0.168956
LOC101803625	-1.71984	-0.715688	0.00237102	0.168956
LOC101794572	-0.582194	5.91373	0.00238494	0.168973
RCAN2	0.986064	1.26683	0.00239242	0.168973
PPP1R9B	-0.755088	2.8169	0.00241614	0.169422
EDA2R	-1.67192	2.72504	0.00242394	0.169422
OGFRL1	1.19169	1.10942	0.00243062	0.169422
PKHD1	-0.876482	3.88195	0.00247254	0.171594
LOC101799826	-1.27041	1.12263	0.00251962	0.173533
LOC101801447	-0.663003	6.94092	0.00253559	0.173533
LOC101797680	-0.813907	4.93299	0.00253581	0.173533
VKORC1L1	-0.712086	7.80572	0.00255267	0.173533
WDR93	-1.95265	-1.32858	0.00255484	0.173533
SLC22A4	-0.902435	5.17241	0.002571	0.173891
LOC101790064	2.81843	-1.84178	0.00259151	0.174148
LOC101796510	-1.59024	-0.8025	0.00260714	0.174148
ESPL1	-1.46916	1.77856	0.00260752	0.174148
CDCA3	-2.1423	-0.0903435	0.00262306	0.174239
LOC101800913	-2.94522	-1.39256	0.00263209	0.174239
LAMB2	-0.881024	2.69927	0.00264164	0.174239
DHX29	0.663379	5.35676	0.0027124	0.177012
TFAP2C	-4.76858	-2.29393	0.0027156	0.177012
LOC101802963	-1.35567	-0.225564	0.00271695	0.177012
KCNIP4	2.4042	-0.916992	0.0027445	0.177054
CCDC12	-0.585208	4.34766	0.00274648	0.177054
LOC101804470	-1.17298	0.609602	0.00275404	0.177054
LOC101793748	-1.36675	3.3252	0.00277634	0.177054
ISLR	-1.06174	0.651764	0.00278124	0.177054
PKP1	-4.76955	-2.29339	0.00278415	0.177054
LOC101789981	-1.33322	0.314386	0.00283368	0.179489
PON2	-0.740283	7.12266	0.00287622	0.181167
KRTCAP3	-0.69486	4.42821	0.00288287	0.181167
AURKA	-1.54909	0.0667234	0.00289595	0.181275
GPR143	1.3377	0.0704464	0.00296218	0.182025
LOC101795735	-1.81306	-0.869669	0.00296342	0.182025
LOC101801831	-0.898543	3.08251	0.00296484	0.182025
MPEG1	-0.681374	5.0929	0.00297002	0.182025
CTNNA3	1.00443	1.39319	0.00297602	0.182025
LOC101791354	-1.02886	1.3669	0.00297636	0.182025
KCNIP2	-1.59345	2.30126	0.00299275	0.182278
LOC101792203	-0.788557	7.88619	0.00301061	0.182278
LOC101790109	-0.829995	2.2004	0.00301474	0.182278
VASH2	-0.730017	2.99668	0.00304072	0.183155
NLGN3	-0.746489	2.36099	0.00305244	0.183169
HEMK1	-0.728714	2.61364	0.0030772	0.183667
LOC101798090	-1.15912	0.168223	0.00310098	0.183667
UBE2QL1	1.53492	0.297726	0.00311069	0.183667
LOC101796068	-1.15093	0.0811658	0.00312063	0.183667
SYT17	-2.23321	-1.16327	0.00312719	0.183667
LOC101800853	-0.723818	4.62678	0.00312978	0.183667
LOC101796096	-0.587083	6.53355	0.00316839	0.185252
B3GNT7	-1.42373	-0.428969	0.00319578	0.185881
EPHA7	1.63213	-0.914587	0.00320427	0.185881
SAMD9L	0.793661	3.72031	0.00321915	0.185881
NUCB2	1.11195	7.24269	0.00322823	0.185881
CLIC6	-1.11226	0.734662	0.00323737	0.185881
ITGA2B	-0.7642	2.35146	0.00326809	0.18691
TOX	-0.805777	1.57987	0.00327871	0.18691
CLCN2	-0.842205	2.88244	0.00332913	0.189109
LHX8	-4.99308	-2.17362	0.00339942	0.192417
LOC101789379	-2.33364	-1.50063	0.00341826	0.192799
MYBL1	-1.65776	-1.08092	0.00343389	0.192999
CEND1	-1.68353	-0.949056	0.00346643	0.193522
TMEM171	1.06799	1.91797	0.00347021	0.193522
LOC101804337	-0.813785	1.90704	0.00349113	0.193522
FBXO6	-0.764264	2.79803	0.00349228	0.193522
LOC101790958	-1.33605	4.10433	0.00350381	0.193522
LOC101792678	-1.25103	-0.182417	0.00353183	0.194317
EHF	-1.09443	1.69817	0.00354255	0.194317
LRAT	-0.863109	3.34893	0.00360498	0.196841
ABLIM3	-0.9902	1.85856	0.00362154	0.196841
RTEL1	0.775709	2.03194	0.00362557	0.196841
LOC101790986	-0.75295	2.99519	0.00374409	0.202275
AGMAT	-0.734074	8.71893	0.00375099	0.202275
LOC101794319	-1.16107	0.481847	0.00380891	0.204421
LOC101797123	-1.89966	-1.36025	0.00381641	0.204421
LOC101799327	-0.744308	1.95168	0.00395485	0.211101
LOC101792138	-0.743012	8.21506	0.00400976	0.211101
RIMS3	-1.47353	-0.538805	0.00402426	0.211101
RACGAP1	-1.11454	0.713108	0.00403075	0.211101
ABHD6	-0.619904	6.52426	0.00403741	0.211101
LOC101792854	-0.615565	4.10236	0.00403953	0.211101
IGF2BP3	0.813484	3.31312	0.00404218	0.211101
LOC101797895	-2.01242	-1.47106	0.00404691	0.211101
NEGR1	-1.35311	-0.540712	0.00406085	0.211138
LOC101792630	0.806178	3.0633	0.00407591	0.211233
RFX4	-1.90193	-1.35811	0.004115	0.212568
UGP2	0.992346	8.45745	0.00417309	0.214874
HUNK	-0.661599	3.13736	0.00420186	0.21566
LOC101792168	-2.65396	-1.89734	0.00426783	0.218343
BBS2	-0.700004	6.78763	0.00434036	0.220678
LOC101790775	2.72957	-1.88951	0.00435314	0.220678
FAM43A	-0.70724	3.08195	0.00436876	0.220678
PNPLA6	-0.651366	4.90346	0.00441028	0.221687
SCUBE3	-1.80134	-1.26064	0.00442273	0.221687
LOC101804882	-0.627039	5.01207	0.0044304	0.221687
PPM1H	-0.835028	1.76223	0.00445459	0.221818
CLDN5	-0.672633	3.27631	0.00446082	0.221818
B2M	-0.603675	10.0981	0.00448772	0.222463
LOC101792744	-2.42126	-1.70347	0.00453501	0.224111
LOC101793042	-1.44244	-0.798669	0.00460868	0.226492
ALK	-2.03037	-1.46336	0.00461156	0.226492
TRIM50	-2.32818	-1.75264	0.00465828	0.227217
ECEL1	-0.595997	4.47912	0.00466259	0.227217
LOC101795751	-1.05687	2.77606	0.00466903	0.227217
LOC101803147	-1.14393	0.906302	0.00479055	0.232422
LOC101801906	-0.825736	1.28739	0.00483087	0.233668
PRSS12	1.56107	-0.682431	0.00489927	0.235547
PCBP4	-1.56172	-1.02416	0.00490927	0.235547
LOC101803910	-0.987543	4.56962	0.00491399	0.235547
LOC101799268	-2.22288	-1.35464	0.00493246	0.235725
TMEM9	-1.00945	0.795515	0.0049907	0.237168
RSPH9	-3.13557	-2.1086	0.00499237	0.237168
SOCS3	-0.930011	0.85853	0.00502464	0.237992
GPC3	-0.898765	1.1313	0.00506176	0.238862
LOC101803510	0.658645	2.96183	0.00508598	0.238862
LOC101801727	-0.666957	5.15752	0.00508789	0.238862
LOC101795947	-1.47532	-0.779067	0.00514573	0.238892
GRHL2	-1.14598	1.19772	0.00514936	0.238892
LOC101793213	1.46878	-0.444119	0.00515636	0.238892
GRIP1	-1.17594	0.802162	0.00516274	0.238892
RIPPLY1	3.20104	-2.10566	0.00516337	0.238892
LOC101800166	-1.26105	0.863643	0.0051914	0.239495
LOC101805140	-1.23595	3.50345	0.00521986	0.23974
LOC101791638	-4.63079	-2.357	0.00523008	0.23974
LOC101800082	1.74733	-1.19512	0.00524177	0.23974
LOC101791023	4.66461	-2.35618	0.00531108	0.242216
LOC101800325	-1.57391	0.01978	0.00536207	0.243844
LOC101796520	-1.03839	0.738437	0.00539368	0.244585
LOC101799022	-2.66062	-1.89407	0.00545203	0.246531
LOC101793969	-0.878652	5.14621	0.00547634	0.246906
COL8A2	-4.6148	-2.36362	0.00549775	0.246906
CPED1	0.783138	2.93532	0.00553206	0.247347
DHRS12	-0.603821	4.0203	0.00560143	0.249748
RERGL	1.53193	2.77458	0.0056902	0.253
LOC101792549	-1.02408	0.54468	0.00581899	0.255869
COL6A6	-1.07757	3.38608	0.00583599	0.255869
LOC101802126	1.34253	-0.391336	0.00584342	0.255869
LOC101799791	0.634422	3.14546	0.00585195	0.255869
CSF3R	-1.10284	1.51524	0.00588521	0.255869
PPP1R32	-1.59796	-1.00022	0.00589196	0.255869
TLCD2	-0.985551	0.373595	0.00591093	0.255869
EMILIN2	-1.59576	0.810304	0.00592445	0.255869
AADAT	0.580369	4.52141	0.00593106	0.255869
THEMIS2	-0.659493	4.30704	0.0059565	0.256274
LOC101797681	-0.936169	0.859889	0.00601308	0.258013
PITX2	0.936044	2.84829	0.00607499	0.259365
LOC101790959	-3.12398	-2.11316	0.0060771	0.259365
LOC101790943	-1.11647	0.578365	0.00610032	0.259662
LOC101798892	-1.24581	-0.236365	0.00614108	0.260702
CDKN1A	-1.21376	2.56093	0.00618735	0.261969
DUSP5	-0.708682	1.87251	0.00622367	0.262068
POLE	-1.75008	1.62335	0.00623893	0.262068
ESCO2	-0.731734	3.3396	0.00633589	0.265442
TRIB1	-0.611908	6.24	0.00636856	0.266112
DSP	-0.795262	5.09061	0.00639091	0.266349
LOC101797744	-0.859581	0.920669	0.00643263	0.26739
THSD7A	0.776342	1.61335	0.00648267	0.26877
LOC101795671	1.08752	0.15909	0.0065075	0.2691
CCDC15	-0.967405	2.76084	0.00656285	0.270688
SLA2	-0.830131	1.92994	0.00665117	0.272715
MFAP2	-0.782383	3.99596	0.00667861	0.272715
FAM198B	-0.780928	1.85647	0.00668033	0.272715
MAP2	-1.22213	-0.251109	0.00672272	0.273745
P2RX2	-1.83517	-1.10268	0.0067512	0.274205
TRUB2	-0.671428	2.5195	0.00685022	0.275928
TXLNB	-1.42583	-0.727807	0.00685283	0.275928
EFR3B	-0.798622	2.93541	0.00685456	0.275928
LOC101804478	-0.682778	7.65382	0.0068671	0.275928
LOC101794146	0.673007	3.88534	0.00691281	0.275928
MIS12	-1.70601	0.00575116	0.00692942	0.275928
SMAD9	-1.21624	-0.427754	0.00693573	0.275928
TAP2	-0.689688	5.43268	0.00696315	0.275928
LOC101801682	1.65843	-0.61505	0.00697052	0.275928
FANCE	-0.760136	3.29162	0.00698376	0.275928
BUB1	-0.987105	1.81281	0.0070181	0.275934
DLGAP5	-0.916096	0.913155	0.00701848	0.275934
ID2	-0.792378	4.00179	0.00705157	0.276553
FBLIM1	-0.619793	2.73431	0.00707807	0.276878
CCNA2	-1.3172	2.78048	0.00715697	0.276878
ACAD10	-0.682987	3.32161	0.00716275	0.276878
LOC101800449	0.642074	3.18816	0.00720138	0.276878
EPAS1	0.661678	9.84382	0.0072124	0.276878
LOC101790110	0.713151	2.41505	0.00722305	0.276878
LOC101803785	-1.04221	0.692862	0.00722384	0.276878
MLPH	-0.917347	0.587995	0.00722775	0.276878
CTSK	-0.764197	2.6267	0.00723332	0.276878
LOC101801461	-0.995686	2.74635	0.0074166	0.283215
ATHL1	-0.862221	5.54017	0.00744848	0.283753
LOC101799496	-0.663833	2.40586	0.00751318	0.285537
S1PR4	-0.864842	0.904835	0.00755409	0.285791
WDFY4	-0.616217	3.09841	0.00755568	0.285791
PTPLA	0.77852	1.35231	0.00758425	0.28613
LOC101795127	-0.89939	1.93354	0.00760049	0.28613
LOC101791142	-0.909914	2.07243	0.00767205	0.287823
LOC101800519	-2.06641	-0.963567	0.00769805	0.287823
HIGD2A	-0.651241	4.13168	0.00772196	0.287823
SBF2	0.63784	4.77286	0.00772309	0.287823
LOC101801346	-0.594492	4.64762	0.00773563	0.287823
KIAA1598	0.672175	2.76982	0.00783166	0.290044
LOC101804125	-0.616268	5.63434	0.00799569	0.295433
ALAS1	-0.811509	6.33987	0.00801782	0.295567
LOC101790680	-0.711701	1.92438	0.00805376	0.296091
TRHDE	-2.24714	-1.79514	0.00806915	0.296091
POC1B	0.819352	3.39577	0.00809706	0.296434
LOC101800761	-0.815828	7.77842	0.00814615	0.297549
TOX3	-1.39611	-0.917799	0.0081904	0.298135
ADPRHL1	2.11026	-1.66234	0.00820377	0.298135
LOC101791616	0.98438	1.37305	0.00823635	0.298135
FTCD	-0.79392	8.45404	0.0082369	0.298135
CTSD	-0.63943	9.37985	0.00827858	0.298966
FANCG	-0.872071	2.62579	0.00832635	0.300012
CD74	-0.603853	8.89636	0.00835335	0.300307
LOC101797788	-0.639644	4.37004	0.00839607	0.301164
LOC101795545	-2.03509	-1.66435	0.00842482	0.30125
CNST	0.612247	3.31064	0.0084362	0.30125
GUCY1A2	0.676665	2.11344	0.00852942	0.303899
TUSC3	0.950762	2.89866	0.00856178	0.304372
LOC101798715	-0.792798	2.67938	0.00862499	0.305926
HSP90B1	0.767608	7.33437	0.00865383	0.305926
LOC101798226	-0.711618	2.14247	0.00869078	0.305926
GALNT3	0.937814	0.635749	0.00869331	0.305926
LOC101796765	-0.862182	1.70272	0.00870277	0.305926
LOC101794784	-3.01563	-2.16684	0.00875196	0.305926
NQO1	-1.32799	5.54062	0.00875408	0.305926
CLDN23	-3.01213	-2.16889	0.00879245	0.306155
AGXT	-0.797939	5.98085	0.00885294	0.307197
KITLG	1.34445	-0.662816	0.00890735	0.308414
LOC101791514	-3.00938	-2.16951	0.00899429	0.310238
BCL11A	-0.792496	1.1218	0.00901926	0.310238
LOC101789961	-1.1392	0.111347	0.00903776	0.310238
AFAP1L2	-0.598983	3.53355	0.00912657	0.312614
LOC101793021	-0.972539	2.24215	0.00931464	0.315427
LOC101790397	-0.680172	2.80376	0.00933353	0.315427
SHCBP1	-1.13847	0.11598	0.00937293	0.315427
LOC101803634	-1.36393	1.8324	0.00940157	0.315427
TNFRSF11B	-1.06128	0.0662443	0.00940376	0.315427
LIN7A	1.87476	-0.992896	0.00940742	0.315427
SGSH	-0.605456	5.22883	0.00946251	0.315427
PCSK6	-0.679026	6.67486	0.00948571	0.315427
LOC101795694	-1.06073	0.107948	0.00950464	0.315427
LMO1	-2.67251	-1.89048	0.00952424	0.315427
LOC101804604	4.49958	-2.42766	0.00953366	0.315427
CDT1	-1.62729	2.14954	0.00953465	0.315427
CCDC147	-4.46252	-2.42982	0.00953545	0.315427
RALYL	-0.96579	0.742433	0.00954396	0.315427
LOC101799383	-1.24223	-0.539813	0.0095654	0.315461
GDPD2	-4.46596	-2.42812	0.00960484	0.316108
LOC101798714	-0.861649	4.3602	0.00963437	0.316427
ADAM20	4.49927	-2.42779	0.00973421	0.318396
MYO1A	-1.67718	-0.198616	0.00976796	0.318847
PLEKHD1	-4.46747	-2.42762	0.00984933	0.320847
LOC101798955	-0.819912	0.853383	0.00994805	0.323403
LOC101805467	-3.02136	-2.16478	0.0101181	0.328262
TMPRSS4	-1.07277	-0.0505236	0.0101417	0.32836
LOC101794064	-0.623732	5.5577	0.0101898	0.328885
SCD5	-0.999484	0.251237	0.0101991	0.328885
RILP	-0.585833	5.01938	0.0102375	0.329457
BUB1B	-1.23977	0.73509	0.0103399	0.331962
EZR	-0.873038	1.81943	0.0103569	0.331962
LOC101794910	0.683405	2.43974	0.0105003	0.335252
RABIF	-0.711895	4.01148	0.0105016	0.335252
COL18A1	-0.839868	5.76667	0.0105528	0.336217
LOC101803845	-0.737541	2.7907	0.0106486	0.337729
LOC101795872	-1.51099	-1.16614	0.0106638	0.337729
LOC101802936	-0.646252	2.34177	0.0107658	0.339612
SAMD9	0.842771	3.21548	0.0108448	0.34137
POU2AF1	-1.24177	-0.752938	0.0109067	0.342028
SMAD7	-0.678336	2.21519	0.0110296	0.345203
OVOL2	-1.32573	-0.306771	0.0110634	0.345584
LOC101791319	-1.32553	-0.358108	0.0111251	0.346306
NETO2	0.915951	0.895138	0.0111299	0.346306
CHRNA2	-0.998501	0.528326	0.0112403	0.348491
LOC101803223	-2.45641	-1.99771	0.0112438	0.348491
HCLS1	-0.721714	4.09074	0.0113334	0.35059
LOC101800620	-1.12032	1.66673	0.0114124	0.352094
LOC101801917	0.596059	4.96297	0.0114262	0.352094
ASS1	-0.701593	2.57285	0.0114724	0.352838
LOC101794492	-2.03699	-1.66393	0.0115812	0.353274
GK	0.960241	8.82089	0.0116126	0.353274
MREG	-1.14483	1.0977	0.0116338	0.353274
NMRK2	0.733778	5.78141	0.0116395	0.353274
LOC101796425	-0.714429	2.61336	0.0116465	0.353274
NEU2	-1.26062	-0.821719	0.0116748	0.353274
HMMR	-1.31946	1.15223	0.0116933	0.353274
LOC101793063	-0.737492	1.30885	0.0117079	0.353274
LOC101803274	-0.76923	1.25399	0.011791	0.353479
TIFA	0.811386	1.7792	0.0117987	0.353479
CCDC104	0.619142	2.88821	0.0118259	0.353479
MMP2	-0.688686	2.36488	0.0118384	0.353479
NUDT21	-0.638547	4.41474	0.0118476	0.353479
GHSR	-1.71204	-1.46563	0.0118745	0.353621
LOC101805112	-1.18072	-0.6435	0.0119203	0.354324
LOC101790076	-1.81273	-1.58232	0.0119947	0.354548
ASPM	-1.15832	2.50391	0.0120279	0.354548
PKD2L1	-1.36575	1.04325	0.0120373	0.354548
LOC101792015	-2.14758	-1.84742	0.0120433	0.354548
DRD3	-1.39071	0.0956584	0.0121396	0.356054
TRH	2.22339	-1.84067	0.0121569	0.356054
MTFR2	-1.01057	0.793084	0.0122568	0.358077
LOC101799813	0.646765	3.79308	0.0122709	0.358077
LOC101801233	-0.611617	7.12529	0.0124329	0.360879
PROB1	-1.95346	-1.70747	0.0124358	0.360879
SNAP91	-0.746751	2.19659	0.0124574	0.360879
LOC101796470	0.816394	0.703676	0.0125287	0.361621
ARL4C	-0.861156	3.57835	0.0125478	0.361621
LOC101790786	-0.624966	4.10816	0.0125509	0.361621
LOC101789658	-1.34709	-0.691198	0.0125844	0.361933
INPP5F	0.715569	1.26922	0.0126994	0.363112
HEPHL1	-1.41326	-1.10988	0.01271	0.363112
LOC101790941	-0.744184	2.13794	0.0127239	0.363112
SHANK2	-0.718203	2.83497	0.0127392	0.363112
SFRP2	-1.42103	-0.816307	0.012783	0.363712
LGALS3	-1.50588	-0.191478	0.0129342	0.366192
LOC101800018	-0.878404	1.90349	0.0129477	0.366192
TCTE3	-1.16481	-0.52065	0.0129609	0.366192
LOC101803302	-1.34751	1.31104	0.012962	0.366192
CORO2A	-0.655566	1.94594	0.0129882	0.366285
LAMB4	-1.95706	-1.70579	0.0130212	0.36657
LOC101795755	-0.737476	1.80973	0.0130458	0.366616
GUCA1B	-1.48526	-0.965205	0.0131052	0.367637
LOC101792451	-1.18309	-0.642292	0.013203	0.368822
SLC15A5	-1.95881	-1.70474	0.0132116	0.368822
GJA3	-1.59295	-1.11444	0.0132168	0.368822
ASXL2	0.591717	3.77509	0.0132832	0.369822
LMO3	-1.81718	-1.58109	0.0133283	0.369822
LOC101791995	-0.817747	1.26619	0.0133374	0.369822
BEAN1	1.23901	4.26315	0.0133453	0.369822
ADAMTSL3	-1.26467	0.518135	0.0133766	0.370048
LOC101798097	-0.693477	7.53097	0.0135932	0.374739
LOC101803228	-1.0755	0.117303	0.0136391	0.375354
AQP4	2.39263	3.15474	0.0136811	0.375354
CEP19	-0.728174	1.42664	0.013686	0.375354
LOC101797138	-0.864411	5.83293	0.0137501	0.375605
SH3BP1	-0.837689	2.39232	0.0137693	0.375605
LOC101799947	-0.909986	0.388987	0.0138308	0.375605
LOC101797493	-1.00131	-0.13788	0.0138332	0.375605
LOC101802046	-0.803241	1.74689	0.0138351	0.375605
PIWIL2	-0.879375	3.14586	0.0138363	0.375605
LOC101794929	-1.082	-0.447389	0.0140224	0.3798
LOC101804001	-0.855706	0.525031	0.0140732	0.3798
NPHP4	-1.02231	1.01873	0.0141127	0.3798
LOC101801051	-1.71432	-1.46478	0.0141355	0.3798
LOC101792972	-0.932546	0.0285809	0.0141521	0.3798
NUSAP1	-0.908635	0.610157	0.0142063	0.3798
DTL	-1.37512	0.453659	0.0142071	0.3798
TNKS1BP1	-0.666225	2.96735	0.0142165	0.3798
AMER3	1.88984	-1.57822	0.0142169	0.3798
ANLN	-1.06194	0.567833	0.0142762	0.380003
ALDH1L2	0.91204	6.00804	0.0143432	0.380942
STARD8	-0.604638	3.91358	0.0143899	0.381547
LOC101796527	-0.604752	4.42585	0.0145837	0.384808
LOC101800539	-1.41078	-1.11111	0.0146028	0.384808
LOC101790913	-0.780663	2.04137	0.0146093	0.384808
RIPK2	0.709768	4.05317	0.0146594	0.385491
LOC101793105	-1.00645	0.286251	0.0147163	0.386328
LOC101794132	-0.899696	0.353803	0.0147638	0.386328
FAM189B	-0.939879	0.178095	0.0148261	0.387319
LOC101805249	-0.733768	6.06983	0.0148502	0.387319
LOC101791537	-1.50469	-0.518639	0.0149254	0.388645
LOC101805074	-2.88401	-2.22784	0.0151092	0.391834
LOC101794101	-0.97353	0.399002	0.015299	0.394765
LOC101798605	-1.09502	-0.382921	0.0153362	0.394765
VAT1L	-0.847377	0.742697	0.0153583	0.394765
LOC101791515	-0.890201	0.599804	0.0155347	0.398018
ART5	-0.891328	2.28749	0.0155759	0.398434
LOC101801220	2.94839	-2.22698	0.0156286	0.398913
TMEM125	-2.88947	-2.22541	0.0156446	0.398913
LOC101797406	-0.653858	3.79736	0.0156833	0.39926
LOC101793815	-0.799253	0.712282	0.0159315	0.404081
ITPRIPL2	-0.805735	1.07624	0.0159403	0.404081
E2F1	-1.34652	1.13233	0.0160148	0.404264
PARP3	-0.759337	1.79247	0.0160266	0.404264
HBEGF	-0.899678	0.411625	0.0160318	0.404264
LOC101796267	-0.659167	2.1283	0.0160987	0.405312
TMEM163	-1.32617	-1.05356	0.0161711	0.406493
LOC101796506	1.07034	0.597161	0.0163642	0.409729
MCM5	-1.52935	2.91387	0.0163909	0.409729
EPHA5	1.20796	-0.213056	0.0164025	0.409729
KIF21B	-0.66184	2.32955	0.0166304	0.414137
PLEKHA2	-0.670061	2.76521	0.0166392	0.414137
VSIG1	0.983446	-0.0205873	0.0166568	0.414137
WDR86	0.883397	3.36966	0.0167045	0.414601
TMEM116	-0.585026	2.94682	0.0168101	0.416005
GPR20	1.71238	-1.50139	0.0169475	0.418116
THSD1	-0.630816	2.11587	0.0169478	0.418116
DECR2	-0.625047	9.87591	0.0170463	0.419343
MRVI1	0.626183	2.07849	0.0170501	0.419343
FMO4	-0.601275	5.37237	0.0171898	0.42148
LOC101798815	-1.00795	-0.182097	0.0172916	0.422677
LOC101794111	0.863738	6.5473	0.0174161	0.424985
FTSJD1	0.640358	3.49804	0.0174393	0.424985
FGFR1	-0.699523	1.70065	0.0174983	0.425633
ELMOD3	-0.664645	2.68062	0.0175472	0.425633
LOC101802762	-0.634863	4.31429	0.0175666	0.425633
LOC101804768	-0.625572	7.08732	0.0175992	0.425633
LOC101802217	1.23524	6.10008	0.0176517	0.42593
ITGB5	-0.609824	6.70044	0.0176788	0.42593
LOC101796577	-1.63263	-1.50747	0.0177246	0.42593
LOC101798211	-0.933105	0.17415	0.0177626	0.42593
NINL	-0.681863	2.19748	0.0177715	0.42593
MOGAT1	-2.34921	-2.05049	0.0179593	0.427806
LOC101801464	1.1375	0.252329	0.0179661	0.427806
LOC101801652	-0.981948	0.0964936	0.0179761	0.427806
MATK	-0.874377	0.988986	0.0179838	0.427806
PKP2	-1.03947	2.34056	0.0181045	0.428277
LOC101797869	-1.15798	-0.586157	0.0181225	0.428277
PLXNA4	-1.01235	2.5705	0.0181373	0.428277
DNAH5	4.31657	-2.50152	0.018177	0.428277
LOC101801104	-4.28002	-2.50328	0.0181804	0.428277
LOC101800367	-4.27872	-2.50393	0.0182188	0.428277
LOC101790908	1.71379	2.77529	0.0182528	0.428277
LOC101791163	-0.866528	2.76531	0.0182764	0.428277
LOC101792431	-0.624574	1.7622	0.0182988	0.428277
FAM19A5	-2.34609	-2.05178	0.0183471	0.42878
MCM8	-1.0508	-0.464938	0.0184207	0.42987
LOC101794704	1.28525	5.017	0.0184545	0.42987
LOC101794193	4.31689	-2.50138	0.0184746	0.42987
RUNX1	-0.64696	2.14442	0.0185431	0.430838
SPIC	1.4567	-1.01837	0.0186405	0.431843
CHST1	-1.20161	-0.776873	0.0186405	0.431843
LOC101802774	-4.28133	-2.50277	0.0187295	0.432248
LOC101791401	4.31795	-2.50096	0.0187333	0.432248
LOC101790088	-2.05047	-1.89545	0.0187392	0.432248
CD7	-0.792082	1.87556	0.0188223	0.432551
PGBD5	-0.86969	1.04392	0.0188336	0.432551
LOC101791383	-0.597232	5.05935	0.0189025	0.433175
LOC101804721	-1.49035	3.85646	0.0190339	0.434799
SLIT3	-0.651964	2.10317	0.0190405	0.434799
SPECC1	-0.610354	2.33406	0.0190818	0.435119
LOC101805219	-0.974784	-0.155125	0.0191278	0.435412
LOC101802187	-1.15648	4.72664	0.0191502	0.435412
ADAMTS19	-2.05031	-1.89596	0.0192467	0.435508
LOC101796047	-4.28632	-2.50101	0.0192625	0.435508
TMEM108	-1.05016	-0.408576	0.0194604	0.438253
TRIM35	-1.081	-0.507379	0.0194663	0.438253
CREB3L1	-0.721704	2.16186	0.0194999	0.438391
PELI2	0.910262	2.62713	0.0197642	0.441646
CHD5	-0.780576	2.54734	0.0197936	0.441646
LOC101799244	-0.672791	1.3545	0.0198107	0.441646
AHI1	0.609771	2.68465	0.0200611	0.444852
SLC5A9	-0.854235	0.627497	0.0201079	0.444852
PCLO	1.94586	-1.74942	0.0202407	0.444852
CASP2	-0.609926	1.90907	0.0202545	0.444852
AGPAT2	-0.646293	5.82396	0.0202598	0.444852
LOC101792680	-1.22601	3.89401	0.0202986	0.444852
DNAJC12	1.54942	4.20762	0.0203144	0.444852
FABP7	-0.976018	3.6311	0.0203643	0.444852
LAMP5	-1.29542	0.40422	0.0203659	0.444852
LOC101802780	-0.85416	3.89728	0.020386	0.444852
MAMDC4	-0.62032	6.91854	0.0204004	0.444852
LOC101798325	0.690731	1.90345	0.0204938	0.445233
LOC101804267	-0.87242	4.60134	0.020508	0.445233
IQGAP3	-1.2946	0.693851	0.020554	0.445233
SLC25A4	0.826952	4.83235	0.020566	0.445233
ADARB2	-1.33455	0.886173	0.0205867	0.445233
LOC101797805	-0.863079	1.73219	0.0206131	0.445233
TDRD1	-1.78277	-1.01714	0.0207025	0.445956
KCNS1	-1.10701	-0.685352	0.0208237	0.447359
IL10RA	-0.617799	2.15457	0.0208779	0.447922
MXRA5	-0.642066	3.30615	0.0210891	0.449635
CDKN2C	1.23077	-0.463747	0.0211355	0.449635
HTR2A	-2.07579	-0.598679	0.0211434	0.449635
ALPI	-2.1649	-1.84171	0.0211624	0.449635
LOC101800916	-0.811894	3.77613	0.0212706	0.449635
PPIL6	-0.786471	1.96809	0.0212958	0.449635
DPYS	0.748243	4.25244	0.0214962	0.453024
LOC101805145	-0.736008	4.91391	0.0215131	0.453024
AVPR1A	1.9347	-1.74877	0.0215443	0.453083
BARX2	-1.11456	-0.752034	0.0217122	0.455434
RAD54L	-0.961165	0.691933	0.0217132	0.455434
LOXL1	-0.791949	0.58841	0.0217524	0.455463
IRF4	-1.10713	0.452121	0.0217827	0.455463
LOC101792766	-1.00422	0.28598	0.0218254	0.455463
LOC101803238	0.616081	2.44685	0.0218664	0.455463
LOC101804039	-1.036	0.00612321	0.0218674	0.455463
LOC101797862	-0.914577	0.268763	0.021909	0.455463
PLD1	-0.596953	4.88708	0.0219793	0.455464
SPP1	-0.704407	4.20676	0.0219999	0.455464
FMN2	1.11503	0.51176	0.0220318	0.455532
FREM2	-1.05807	1.97313	0.0220855	0.455733
LOC101801200	-0.900426	2.60582	0.0221161	0.455733
CD226	-0.851625	0.700468	0.0221348	0.455733
APOD	-0.628496	2.0179	0.0221557	0.455733
ACTG2	-0.656235	3.66006	0.0223423	0.457801
SPTBN4	-0.924511	-0.096992	0.0224107	0.458028
FAM154A	-1.50098	-1.42874	0.0224963	0.458604
SLC38A2	0.634517	7.24787	0.0225663	0.459275
HGF	-0.899591	1.86723	0.0230675	0.467858
MICU3	0.58163	3.11582	0.0231649	0.469078
SOD3	-0.986125	1.61332	0.0231865	0.469078
FEN1	-0.630146	1.6265	0.023246	0.469529
LOC101789604	-0.710477	6.98482	0.0232676	0.469529
DACT2	-0.949382	-0.0814526	0.0233367	0.469792
GALNTL6	-1.05772	-0.582439	0.0234633	0.469792
SPOCK3	1.1558	-0.500492	0.023489	0.469792
UAP1	-0.661982	6.71172	0.0234995	0.469792
LOC101801179	-0.766324	0.550108	0.0235245	0.469792
LOC101802055	-1.50189	-1.42813	0.0235273	0.469792
LOC101790888	-0.600623	2.92722	0.0235455	0.469792
PTGES	-0.866586	0.631873	0.0236101	0.470493
SLC41A2	0.618198	2.89039	0.0236602	0.470903
TRUB1	0.775688	3.38842	0.0237297	0.471287
LOC101800505	-0.743888	0.767098	0.0238314	0.471957
TNS4	-1.41024	-1.2241	0.0239725	0.472989
TNFRSF6B	1.03159	3.67276	0.0240049	0.473045
LOC101797685	-0.67626	1.13306	0.0240609	0.473056
LOC101796144	-0.899708	-0.0695486	0.0240944	0.473056
BLK	-0.716711	1.31175	0.0249492	0.484201
GHRHR	-2.53895	-1.38782	0.0249827	0.484201
LOC101797086	-1.32397	-1.05607	0.0250021	0.484201
ARPP21	-0.955064	0.0392104	0.0250594	0.484201
TRMT2B	-0.67175	2.57511	0.0250867	0.484201
LOC101797696	1.64358	-1.54007	0.0251625	0.485078
QPCT	1.21892	5.96948	0.0252513	0.486202
LOC101801916	-0.677438	1.99659	0.0253877	0.487651
COL4A4	-1.44894	-1.32407	0.0255	0.489129
TECTA	-0.727476	1.40432	0.0255259	0.489129
FAM46C	-0.790848	0.754344	0.0256254	0.490391
PIK3IP1	-0.667933	2.51964	0.0256532	0.490391
LOC101794839	-0.963321	-0.0313998	0.0257621	0.4915
RGS14	-0.75128	1.65682	0.025775	0.4915
SCARA3	-0.893705	0.0785678	0.0258313	0.4915
LOC101796210	-1.34121	-1.25961	0.0259319	0.4915
TMTC2	0.62924	3.24239	0.0259655	0.4915
TMEM260	0.583279	2.02355	0.0260195	0.4915
LOC101794323	-0.606501	2.53874	0.0260602	0.4915
LOC101803428	0.996906	1.10215	0.0260759	0.4915
LOC101803666	-0.664886	3.9329	0.0261878	0.4915
MED8	-0.625231	3.76086	0.0261913	0.4915
ACN9	0.638914	2.69489	0.026376	0.4915
LOC101797449	-2.73321	-2.29361	0.0264079	0.4915
LOC101800468	2.80089	-2.2902	0.0264374	0.4915
LOC101790495	-1.03523	3.52444	0.026483	0.4915
LOC101791544	-2.73351	-2.29402	0.0264967	0.4915
DBI	-0.702066	7.84545	0.0265013	0.4915
GRK4	-1.04994	3.10397	0.0265295	0.4915
KIF14	-1.25681	-0.996816	0.026535	0.4915
LOC101800839	-0.74026	8.14774	0.0265544	0.4915
LOC101804901	-2.74031	-2.29012	0.0265821	0.4915
ITGB8	-1.21242	-1.0242	0.0266546	0.491863
LOC101796603	-0.634595	2.63382	0.0268136	0.494225
BAG2	-0.980289	-0.395022	0.0269196	0.494289
SLC7A11	0.985446	2.61195	0.0269505	0.494289
PCP4	0.920828	-0.0631318	0.0269824	0.494289
PUS7L	0.613394	1.93712	0.0269929	0.494289
AHDC1	-0.64317	1.49432	0.0270603	0.494455
SIDT1	-1.24396	-0.916897	0.0271871	0.49539
LSM1	-0.598528	1.58657	0.0272219	0.495458
RRM2	-1.40493	1.6407	0.0273138	0.496069
ASB5	-0.656691	2.17417	0.0275267	0.496069
STIL	-1.18297	-0.867686	0.0275328	0.496069
SLC9A5	-0.625759	1.76501	0.0275352	0.496069
ADC	-0.580972	5.70617	0.0276369	0.49734
LOC101801548	1.10116	1.47714	0.0277269	0.497629
NBEAL1	0.604963	6.0488	0.0277967	0.49797
DACT1	-0.636226	1.62993	0.0278638	0.498108
LOC101801653	-0.726903	7.00301	0.0279222	0.498108
LOC101791060	-0.698097	1.17808	0.0279545	0.498108
PRIMA1	-0.659877	3.74669	0.0280154	0.498108
GALNT9	-1.65428	-1.66489	0.0280495	0.498108
LOC101792261	-1.17252	-0.796432	0.0280541	0.498108
LOC101794177	0.590198	3.19295	0.0280977	0.498328
GRHL3	1.85237	-1.795	0.0283332	0.501456
PTPRT	-1.02681	0.0875412	0.0283838	0.501456
LOC101803402	-0.7731	5.05233	0.0283959	0.501456
SRCIN1	-0.710832	0.963947	0.0284152	0.501456
DNAAF1	-1.37995	-1.36017	0.0284455	0.501456
LOC101798939	-0.695788	1.45082	0.0285272	0.501456
DUOX2	-2.73959	-2.2908	0.0285341	0.501456
COL1A1	-0.637451	4.05242	0.0286019	0.501456
RRP12	-0.672503	7.07039	0.0286091	0.501456
EFNB2	0.581398	1.72808	0.0286183	0.501456
LOC101796295	-0.673967	2.37107	0.0286196	0.501456
WIF1	1.84845	-1.79329	0.028732	0.502528
DFNB31	-0.611698	3.66031	0.0287437	0.502528
LOC101797794	-2.22264	-2.10895	0.0290618	0.506424
GJB7	-1.01937	-0.322359	0.0291226	0.506929
LOC101795915	0.778516	2.96853	0.0291949	0.507635
LOC101790181	-1.2171	-0.847339	0.0292964	0.508218
PTTG1	-1.0603	0.0285165	0.0293239	0.508218
LOC101799766	1.36407	1.94747	0.0295787	0.511205
LOC101790920	-1.95499	-1.94248	0.0295923	0.511205
CSRNP3	0.633846	1.59436	0.0297736	0.513224
LOC101801774	-1.13995	-0.890705	0.0298679	0.513349
EBF1	0.716749	0.66965	0.0299323	0.513349
LOC101789429	-0.662403	3.56181	0.0299475	0.513349
LOC101797566	-0.764695	7.49534	0.0300673	0.513411
LOC101792254	-0.904006	1.15986	0.030071	0.513411
LOC101799863	-0.97754	-0.451249	0.0300739	0.513411
ORC1	-0.617882	1.44265	0.030204	0.514303
PPAPDC3	-0.64758	1.25618	0.0302669	0.514426
ITM2C	-0.789186	0.346826	0.0303135	0.514426
MCM3	-1.37942	2.37343	0.0304141	0.514426
LOC101795563	-1.02476	-0.426403	0.0304377	0.514426
LOC101805092	-1.62517	-1.50918	0.0304413	0.514426
ACAP3	-0.582467	2.38949	0.0304556	0.514426
CYTIP	-0.94974	1.67774	0.0305891	0.514933
SH3BGR	-0.70476	3.77811	0.0306146	0.514933
LOC101791796	-1.62273	2.36198	0.0307274	0.515699
LOC101805316	-2.74344	-2.29017	0.0308444	0.515699
GADD45A	-0.670495	0.940878	0.0308453	0.515699
LOC101797929	-0.615481	2.76884	0.0308715	0.515699
METTL24	-0.778388	0.532722	0.0311539	0.518539
TPX2	-0.803211	2.1044	0.0312512	0.519447
LOC101790028	-1.95851	-1.941	0.0313522	0.519447
FEZ1	-0.861447	0.527148	0.0313712	0.519447
CDH17	-0.861849	-0.0518485	0.031456	0.520312
NAB2	-1.05406	-0.58593	0.0315679	0.521622
MICAL2	0.70198	5.25497	0.0316986	0.521685
P2RX5	-0.737023	1.32548	0.0317066	0.521685
GP5	-0.75326	0.682305	0.0317351	0.521685
TERT	-1.25527	-1.19683	0.0317723	0.521759
LOC101799400	-1.7228	-1.46288	0.0318378	0.521761
ASB12	-2.28352	-1.76009	0.031943	0.522103
KIT	0.855764	0.0202897	0.0319691	0.522103
LOC101793336	-1.95838	-1.94035	0.0319887	0.522103
SLC6A14	-0.726274	2.15123	0.0319895	0.522103
LOC101805071	0.72176	0.737213	0.0320269	0.522179
LOC101794277	-0.984908	-0.623129	0.0321466	0.522646
LOC101794791	-0.788057	0.509638	0.0321538	0.522646
AIF1L	-0.705842	2.92304	0.0322325	0.523031
LOC101802154	-0.636411	2.317	0.032243	0.523031
PCDH20	1.5022	-1.46242	0.0324097	0.523525
PAX5	-0.90404	0.418034	0.0325025	0.523525
LOC101797421	-1.24746	-1.19952	0.032513	0.523525
ADRB1	-0.676862	1.1193	0.032743	0.524211
LOC101802104	-1.11905	1.66364	0.0327755	0.524211
GPR98	-0.74862	1.15915	0.03284	0.524361
TMEM173	-1.42484	-1.46749	0.0330986	0.525432
SSUH2	1.12616	0.251114	0.0335932	0.529856
TP53I3	-0.761915	3.8824	0.0337417	0.531149
KCNQ1	-0.826184	0.145889	0.0338388	0.531379
LOC101803780	-1.50411	-0.108819	0.0338465	0.531379
CBFA2T2	-0.664736	1.25009	0.0339035	0.531379
RLTPR	-1.13508	-0.297161	0.0339291	0.531379
LOC101789534	-1.05471	4.02821	0.0340999	0.532468
USH1G	-0.680278	1.94666	0.0341257	0.532468
UNC5C	-0.869344	1.36108	0.0342673	0.532516
PCNXL2	-0.669397	1.80197	0.0345724	0.533698
WISP3	4.10591	-2.57979	0.0348409	0.535407
COPRS	-1.54723	-0.837945	0.0348553	0.535407
LOC101790136	4.10534	-2.58007	0.0348999	0.535407
LOC101802452	-4.07139	-2.58045	0.0349152	0.535407
TMEM139	-1.16031	-1.05097	0.0349688	0.535407
FNDC9	-4.06814	-2.58204	0.0350393	0.535407
LOC101796243	-1.49215	-1.58088	0.0350602	0.535407
LOC101794574	-4.06557	-2.58325	0.0350861	0.535407
WNT6	-4.06616	-2.58297	0.0350867	0.535407
LOC101802340	-4.07288	-2.5798	0.0351133	0.535407
LOC101794769	-4.07348	-2.57952	0.0351191	0.535407
LDLRAD1	-4.06396	-2.5839	0.035284	0.536384
LOC101795536	-0.679709	1.85867	0.0353564	0.536858
LOC101800725	-0.755727	0.665086	0.0354312	0.536858
DCDC2	-0.664312	2.92338	0.0354708	0.536858
CNTLN	-0.645121	1.35201	0.0355427	0.537246
LOC101797265	2.40545	-0.182644	0.0357069	0.53894
LOC101796566	-4.06121	-2.58483	0.0357222	0.53894
LOC101797756	-4.07487	-2.57924	0.0358596	0.539891
ACE2	-1.02024	1.09944	0.0359206	0.539891
BOK	-0.597897	1.49093	0.036028	0.540782
LOC101792086	0.589093	1.98742	0.036131	0.540782
LOC101794631	-0.854698	2.38712	0.0361483	0.540782
HOMER3	-0.596201	1.62063	0.0361562	0.540782
KLHL14	-1.3877	4.21851	0.0362764	0.541163
LOC101790655	-1.58275	-1.53797	0.0367459	0.545617
IGF2BP1	0.812523	0.56368	0.0370014	0.547189
LOC101795420	-0.583934	1.90271	0.0371073	0.547189
LOC101791467	-1.6041	0.410419	0.0371147	0.547189
LOC101799880	1.02794	0.218409	0.037126	0.547189
LOC101803954	-1.49556	-1.5791	0.0372024	0.547785
LOC101803193	-0.982691	-0.561545	0.0372351	0.547785
KCTD16	1.28724	-0.499869	0.0375207	0.551478
LPAR3	-1.16999	-0.723783	0.0375873	0.551484
CASC5	-0.811902	0.447564	0.0375902	0.551484
SEMA3C	0.758146	0.367693	0.0376977	0.552553
TTC9	-0.965634	0.0453583	0.0380727	0.554609
LOC101795151	-0.768264	1.9711	0.0380811	0.554609
TTC39A	-0.81689	0.108493	0.0382588	0.556182
NT5M	-0.645725	1.83629	0.0383326	0.556747
LOC101800304	-1.12306	-0.74794	0.0385705	0.558514
LOC101802461	-1.33276	-1.26453	0.0387307	0.559474
VEPH1	-1.5711	-1.70671	0.0390541	0.560772
OIP5	-0.898014	-0.15568	0.039057	0.560772
LOC101798103	-0.960334	-0.356791	0.0391086	0.560772
TTC14	0.67322	6.30719	0.0391576	0.560772
TMEM27	-0.661708	3.14787	0.0391589	0.560772
LOC101799459	-1.06666	-0.777334	0.0392205	0.560772
TMED6	-0.722801	0.447646	0.0392267	0.560772
S100A1	-1.57453	-1.70579	0.0392346	0.560772
LOC101794859	-0.975957	0.0169423	0.0394665	0.560772
VWF	0.765343	3.04216	0.0394825	0.560772
LOC101795495	0.777531	0.62336	0.0395667	0.560772
WNT9A	-0.896293	0.898538	0.0395801	0.560772
LOC101801703	-0.65869	2.50906	0.0395838	0.560772
LOC101802873	-0.819084	0.275733	0.039594	0.560772
LOC101796065	-1.49966	-1.57926	0.0396506	0.560772
RNF157	-1.14871	-0.96899	0.0396944	0.560772
LOC101793179	1.17483	-0.993537	0.0398363	0.560772
LOC101790139	-1.07757	-0.847156	0.0399002	0.560772
LOC101802315	-0.81527	0.910133	0.0400536	0.561699
NEB	0.86485	-0.135554	0.0400811	0.561699
LOC101795398	-0.874027	0.728755	0.0401521	0.561707
LOC101804724	-1.19098	-0.444605	0.0402204	0.561982
SCN3B	1.1361	5.94219	0.0403928	0.5631
LOC101797371	-0.879034	0.997114	0.0404556	0.563129
LOC101798011	-1.49541	-1.58034	0.0404654	0.563129
LOC101790647	-0.760882	5.44166	0.0405336	0.563255
KIF15	-0.81827	1.68381	0.0407486	0.5651
GALNT4	0.72393	3.81419	0.0409262	0.566292
ADAMTS10	-0.6247	1.69713	0.0409602	0.566292
PTTG1IP	-0.914451	4.95128	0.0409765	0.566292
HMCN2	-1.44333	-0.99386	0.0414875	0.570601
FGF4	-1.28672	-1.28855	0.0414896	0.570601
NUP210L	-0.657843	1.15266	0.0415028	0.570601
CPZ	-0.944347	0.281378	0.0418039	0.572768
LOC101801429	-1.05963	-0.400167	0.0419387	0.572809
LOC101800907	-0.919802	-0.540221	0.0419872	0.572821
LOC101801771	-0.839573	-0.10494	0.0422439	0.574396
LRRC52	-0.990942	-0.682453	0.0423241	0.574396
HDAC9	0.583124	1.20555	0.0423429	0.574396
LOC101798603	-1.28979	-1.28891	0.0423982	0.574396
LOC101790656	1.75639	-1.84342	0.0424247	0.574396
FAM211B	-1.07844	-0.701951	0.0426359	0.574971
MYT1L	-1.67804	-1.8454	0.0426752	0.574971
FGF12	-1.66663	-1.66147	0.0427618	0.574971
LOC101804783	-0.941642	-0.47103	0.042845	0.574971
LOC101797703	0.608634	3.32671	0.0428911	0.574971
NKAIN2	1.6512	-1.70578	0.0428983	0.574971
LOC101794796	-1.43329	-1.46527	0.0429049	0.574971
FAM212B	-0.800221	0.261862	0.0429373	0.574971
LOC101793778	-0.696303	4.45339	0.0430125	0.575012
TRANK1	0.636781	3.66793	0.0432046	0.576528
SIM2	1.64254	-1.706	0.0433064	0.576528
CTLA4	-1.20064	-0.852696	0.043662	0.578848
ITGAE	-0.678007	1.244	0.0437749	0.579433
MATN2	1.06702	0.855016	0.043854	0.579468
PMM1	-0.587423	4.52768	0.0439855	0.579626
DCTD	-1.05674	-0.0609419	0.0440697	0.579918
LOC101797322	-0.948241	-0.52386	0.044337	0.581484
ASAH2	-1.28891	-1.28974	0.0444139	0.581484
LOC101800699	-0.734787	6.60143	0.0444472	0.581484
FLT3	-0.76118	1.55638	0.0445122	0.581484
USP18	0.815502	1.91276	0.0446266	0.581502
LOC101794794	-1.18943	-1.23011	0.0446272	0.581502
LSM10	-0.586805	2.38368	0.0447321	0.582178
CCNA1	-1.89583	-0.423584	0.0447521	0.582178
LOC101801058	-1.29403	-1.17358	0.0450982	0.584977
KLHDC7A	-1.10993	-1.07813	0.0451914	0.584977
PDZD9	-1.34602	-1.25755	0.0452597	0.584977
COLEC12	0.63477	0.916185	0.0453865	0.584977
LOC101798826	0.696194	2.91747	0.0454015	0.584977
TRNAG-UCC	1.90942	-1.99341	0.0454073	0.584977
LOC101798584	2.63917	-2.35691	0.0455146	0.584977
CACNB2	0.647241	3.01381	0.045613	0.584977
LOC101803478	2.63859	-2.35691	0.0456131	0.584977
LOC101790071	1.55954	-1.57854	0.0456195	0.584977
KIAA2022	-0.749663	0.968142	0.0456897	0.584977
SOGA3	-2.57252	-2.3602	0.0457037	0.584977
LOC101793937	1.91328	-1.9949	0.0457121	0.584977
LOC101792920	-1.83723	-1.99741	0.0457368	0.584977
FAT2	-1.84108	-1.9963	0.0458204	0.585028
LOC101796809	0.758995	1.14404	0.0458459	0.585028
JPH3	2.6377	-2.35731	0.0459351	0.585028
LOC101790907	-2.57565	-2.3581	0.0459883	0.585028
LOC101798466	-2.57793	-2.3576	0.0459974	0.585028
HHIPL1	-0.824987	1.06517	0.0460956	0.58581
NWD1	-2.57078	-2.36097	0.0461728	0.585859
PLAG1	0.654618	0.93092	0.046222	0.586017
CHL1	1.72965	-1.66219	0.0462828	0.586158
LOC101804131	-1.35719	-1.50291	0.0463867	0.586158
RHOC	-0.676852	7.11653	0.0464924	0.586158
LOC101799637	-2.56733	-2.36189	0.0465131	0.586158
LOC101789849	-0.750522	0.633904	0.0465309	0.586158
TFPI	0.687744	2.64857	0.0465318	0.586158
OCIAD2	-0.596325	4.12681	0.0466337	0.586158
AOX1	1.56667	7.19791	0.046637	0.586158
ADAMTS18	0.882598	1.88099	0.0468106	0.586953
LOC101798228	-0.63841	7.84928	0.0468939	0.58744
LOC101794413	-1.83147	-2.00003	0.046923	0.58744
LOC101789448	-2.09095	-2.16693	0.0470982	0.587788
LOC101795297	0.770864	0.167647	0.0472479	0.588325
LOC101799867	-0.678976	0.708276	0.0472985	0.588448
TP73	-0.987054	-0.821214	0.0473643	0.588455
LOC101800012	0.770469	0.20781	0.0474081	0.588455
LOC101805420	-2.09454	-2.16567	0.0474096	0.588455
LOC101805157	-1.04188	-0.868873	0.0475195	0.588604
LOC101796634	2.16036	-2.16393	0.0475323	0.588604
LOC101793395	-2.58132	-2.35654	0.0475727	0.588648
LOC101802925	-0.73343	5.26089	0.0478473	0.590672
GDAP1L1	-2.09715	-2.16451	0.048049	0.591995
LOC101803725	1.43246	-1.50009	0.048102	0.591995
SPC25	-1.09486	0.44154	0.0481239	0.591995
LOC101800143	0.69715	0.54868	0.0482229	0.591995
LOC101794001	-0.733589	0.398964	0.0482503	0.591995
LOC101799678	-1.02122	-0.73182	0.0482804	0.591995
FAM228B	-1.21447	-1.32779	0.0485659	0.593675
VSTM4	-0.590838	1.11578	0.0485889	0.593675
LOC101793455	-1.10022	1.31452	0.0485959	0.593675
CAMK1G	2.16483	-2.16402	0.0486113	0.593675
LOC101789772	-0.757639	0.0384251	0.0487253	0.594613
CPO	-2.56127	-2.36344	0.0488586	0.595766
CILP	2.3782	-1.10786	0.0494923	0.600233
PIK3R6	-0.645991	1.86786	0.0495433	0.600233
CACNA2D3	-0.922816	2.56503	0.049775	0.601824
CRISP3	1.90626	-1.99471	0.049883	0.602294

## Sheet: Thr-D vs Pair-F
Supplemental Table 3C
gene	logFC	logCPM	PValue	FDR
SOCS3	2.45201	2.00208	4.91993e-13	7.85319e-09
EEF1A2	3.42892	0.351555	6.09952e-12	4.86802e-08
LOC101790142	6.30421	5.25855	1.33646e-11	7.11087e-08
LOC101790078	-2.52695	1.27673	5.45492e-11	2.17678e-07
DNAH1	3.49015	0.282928	2.01387e-10	6.42908e-07
LGALS3	2.53098	0.57997	6.68398e-10	1.77816e-06
MYO1A	3.06092	0.885869	2.9465e-09	6.71885e-06
LOC101795130	-3.10946	0.214488	4.61381e-09	9.20571e-06
MRP63	-1.73606	2.04486	1.44021e-08	2.55429e-05
IRG1	5.06653	2.9559	1.72519e-08	2.75375e-05
LOC101803580	2.71386	0.196271	1.98291e-08	2.87739e-05
PRMT8	-1.82492	1.4435	5.66718e-08	7.53829e-05
LOC101794579	1.5588	3.68852	1.11015e-07	0.000136309
NOXO1	4.11933	4.6954	1.61995e-07	0.000184697
MLKL	1.82456	3.27483	3.27887e-07	0.000348916
LOC101802909	1.42514	4.47563	3.96017e-07	0.000395076
LOC101794290	-2.06282	3.67187	8.63151e-07	0.000810448
LOC101798115	-5.99048	-1.29935	1.02433e-06	0.000861501
ETNPPL	-1.912	5.69706	1.02547e-06	0.000861501
ADAMTSL3	1.89698	1.00295	1.69915e-06	0.00135609
LOC101805140	2.04762	4.16527	1.79906e-06	0.00136746
LOC101794101	1.68688	0.908617	2.08157e-06	0.0014853
LOC101803936	3.06328	-0.543771	2.14021e-06	0.0014853
MMP9	2.17903	0.190064	2.76932e-06	0.00184183
LOC101794492	3.93025	-0.289465	4.16024e-06	0.00265623
SLC34A1	3.23827	0.533406	4.40077e-06	0.00270174
LOC101802452	6.03348	-1.4681	5.19924e-06	0.00307371
LOC101798932	1.99569	0.826547	6.67672e-06	0.00380621
LOC101791385	1.32597	5.24651	8.62866e-06	0.00474934
ASAH2	5.4292	2.09481	8.93279e-06	0.00475284
TRHR	-1.92885	1.24092	9.2669e-06	0.00477156
LOC101798523	5.15955	11.4149	1.13826e-05	0.00567777
LOC101801916	1.57124	2.64796	1.26272e-05	0.00610772
LOC101791724	4.84976	9.20421	1.5307e-05	0.00718618
LOC101793812	1.56578	3.50633	1.58432e-05	0.00722541
LOC101791437	1.9412	0.478275	1.65845e-05	0.00735337
LOC101792426	1.67439	0.661757	1.79317e-05	0.00773583
LOC101797769	1.20997	2.25405	1.87161e-05	0.00786176
LOC101800394	3.8181	2.86372	1.98829e-05	0.00793517
REG4	-2.67598	3.96088	1.98852e-05	0.00793517
LOC101797535	1.75416	0.286841	2.4147e-05	0.00929086
LOC101793805	7.37013	-0.267608	2.52686e-05	0.00929086
LOC101797569	2.13085	3.46662	2.55212e-05	0.00929086
GSC	4.18207	0.0493379	2.56107e-05	0.00929086
PLD5	4.99151	-0.129369	2.85196e-05	0.0101162
MUC13	2.56816	0.765372	3.5978e-05	0.0119847
ABHD11	1.13778	3.19969	3.62348e-05	0.0119847
LOC101800982	2.95034	-0.297798	3.65756e-05	0.0119847
ANKRD6	3.12289	0.99115	3.75281e-05	0.0119847
INHBA	-2.49717	0.850755	3.83447e-05	0.0119847
ADARB2	1.98117	1.38898	3.83928e-05	0.0119847
LOC101805329	7.42205	-0.217499	3.90431e-05	0.0119847
LOC101796874	2.0432	-0.0452705	4.16458e-05	0.0125424
LOC101802154	2.12338	3.42947	4.37038e-05	0.0129185
SLC25A29	-1.3683	5.98747	4.92219e-05	0.0140087
LOC101805337	-1.0242	3.05891	4.97696e-05	0.0140087
ENPP2	-1.13434	4.85867	5.00247e-05	0.0140087
LECT2	4.40555	8.02051	5.12401e-05	0.0141016
DPYS	1.05082	5.25288	5.23456e-05	0.0141617
STK32B	3.18835	-1.17107	5.5211e-05	0.014688
EIF4E3	-1.01937	3.68884	5.82687e-05	0.0148598
ADAMTS19	3.01693	-1.29513	5.86139e-05	0.0148598
UNC5C	1.68972	1.96082	5.86498e-05	0.0148598
LOC101800722	7.7038	0.0300926	6.12917e-05	0.0152865
DNER	1.44017	0.830029	6.4334e-05	0.0157984
LOC101790213	7.51137	-0.1365	6.8518e-05	0.016571
ROS1	1.85962	-0.178729	7.82776e-05	0.0186488
LOC101797547	-2.80075	0.5031	8.89887e-05	0.0207798
LOC101800358	1.82799	5.53965	8.9826e-05	0.0207798
CBS	-1.32261	4.46099	9.55665e-05	0.0215685
CDKN1A	1.20536	2.60825	9.59382e-05	0.0215685
LOC101802027	-2.1824	2.13876	0.000126242	0.0278905
EPCAM	1.31683	0.938737	0.000127553	0.0278905
LOC101790497	8.22378	3.99681	0.000134819	0.0290808
NKAIN4	-2.67723	-0.900859	0.000158361	0.0337034
ARL6	1.42986	0.63682	0.000164895	0.0346323
LOC101804805	-1.06853	3.63208	0.000167132	0.0346461
LOC101792809	1.65694	0.456192	0.000170278	0.0348459
LOC101794837	-1.65804	0.303627	0.000183028	0.0365441
LOC101798103	1.64812	0.113839	0.000186473	0.0365441
PRUNE2	3.98117	-1.56192	0.000187062	0.0365441
RIMS4	1.52156	1.58678	0.000190507	0.0365441
OGFRL1	-1.56955	1.1095	0.00019188	0.0365441
LOC101797198	4.1376	1.1776	0.000192313	0.0365441
SNX10	1.43224	3.88507	0.000198713	0.037316
LOC101798355	4.45914	3.04582	0.000204072	0.0376032
LOC101801038	7.52207	-0.122308	0.000205009	0.0376032
LOC101793837	3.56133	-0.846649	0.00020731	0.0376032
LOC101793250	7.40457	1.36695	0.000219099	0.039295
LOC101791640	2.00512	-0.600462	0.000239861	0.0425406
MPND	2.31973	-0.902669	0.00025164	0.0441393
FOS	1.24122	1.2086	0.000266947	0.0463153
LOC101800402	-5.21698	-1.78214	0.000283545	0.0486661
SH3KBP1	1.04264	3.26043	0.000296588	0.0501379
LOC101790578	2.54495	-1.09614	0.000298402	0.0501379
FAM69B	2.02373	-0.475418	0.000303328	0.0504346
LOC101799527	2.85549	-1.11778	0.000308667	0.0507933
QSOX1	1.31392	3.4412	0.000318824	0.051842
LOC101797566	-1.28243	6.62181	0.000321536	0.051842
LOC101793855	-6.09191	1.1355	0.000338489	0.0540295
SLC6A19	6.38599	-1.34974	0.00035817	0.0566051
LOC101802165	4.11556	-1.44413	0.000376187	0.0579692
LOC101789961	1.61334	0.464939	0.000377156	0.0579692
FAM20C	-0.801057	5.3469	0.000377697	0.0579692
LOC101796068	1.44155	0.308242	0.00038969	0.0592403
LOC101789623	3.63618	-0.48787	0.000394327	0.0593756
TRIM3	1.43275	12.072	0.000401222	0.0593756
LOC101794146	-1.24696	3.75999	0.00040174	0.0593756
PRL	7.03292	-0.687352	0.000419591	0.0614451
LOC101802553	-2.50212	0.193749	0.000461107	0.0668375
LOC101792349	6.36493	0.423786	0.000464789	0.0668375
STOX1	-3.15706	2.62691	0.000477133	0.0679999
LOC101793178	5.83541	0.653246	0.000484658	0.0684611
FGFR3	0.864501	7.06877	0.000489563	0.0685475
LOC101798642	-2.77325	-1.11389	0.000514598	0.0712469
LOC101791136	1.96062	1.44871	0.00051777	0.0712469
LOC101803185	1.623	-0.131566	0.000526195	0.0717874
LOC101791616	-1.22099	1.39002	0.000538949	0.0729043
LOC101791834	6.48021	-0.973116	0.00055337	0.0736074
LOC101798346	6.48021	-0.973116	0.00055337	0.0736074
BCL2L15	2.52458	-0.195724	0.000561799	0.0739112
WDR27	-2.71839	-0.382301	0.000564914	0.0739112
LOC101797318	2.67312	2.66346	0.000578896	0.0747543
HAL	-1.06399	7.46459	0.000583751	0.0747543
LOC101798110	6.44168	-1.00276	0.000585408	0.0747543
SEMA3E	1.40949	0.476768	0.000611987	0.0760754
LOC101789923	6.31966	-1.09566	0.000614953	0.0760754
ZSWIM6	6.31966	-1.09566	0.000614953	0.0760754
SLC34A2	1.89443	-0.564822	0.000615084	0.0760754
LOC101797970	4.41772	-1.19029	0.000619584	0.0760754
LOC101792168	3.1681	-1.54638	0.000642968	0.078344
LOC101798248	-1.14385	2.19228	0.000658388	0.0796151
LOC101794709	-8.4329	0.674127	0.000670091	0.080421
CLIC6	1.383	0.958389	0.000705168	0.0835714
LOC101797093	6.42191	-1.16222	0.000710901	0.0835714
LOC101802412	-2.48425	5.29338	0.000712048	0.0835714
LOC101803486	1.78226	-0.465311	0.000730216	0.0850782
LOC101801047	-1.51401	0.00118426	0.000740065	0.0856009
ACOT12	1.73116	0.408174	0.000749413	0.0860585
CGA	6.31671	-1.23855	0.000759508	0.0865174
ELF3	1.69396	0.0425004	0.000764249	0.0865174
AASS	-1.66971	5.30606	0.000802037	0.0901557
LOC101797315	-1.57956	0.778135	0.000817832	0.0907595
LOC101793099	2.01198	-0.488525	0.00081878	0.0907595
STAC	1.33572	1.46044	0.000825463	0.0908692
CHRNB4	-1.42061	0.424073	0.000844875	0.0919857
CCDC147	5.09089	-1.98325	0.00084713	0.0919857
GRHL2	1.16998	1.26049	0.000867071	0.092888
PHOSPHO2	0.900685	2.60532	0.000867079	0.092888
RSPH9	3.71523	-1.71299	0.000911552	0.0955401
LOC101790479	5.9347	-1.37872	0.00091213	0.0955401
LOC101795174	5.9347	-1.37872	0.00091213	0.0955401
FGF4	2.02169	-0.811318	0.000915777	0.0955401
LOC101805359	4.06031	-1.45446	0.000927348	0.096119
LOC101794340	6.04059	-1.30239	0.000934276	0.0962123
LOC101804700	5.87885	-1.41851	0.000990649	0.101364
C7	-1.0975	3.79242	0.00100259	0.10152
FGB	0.77169	13.4378	0.0010049	0.10152
LOC101793809	5.49234	-0.327702	0.00101646	0.101918
GFPT2	1.42304	2.02083	0.00102623	0.101918
LOC101795489	-2.03898	7.98603	0.00102799	0.101918
RBM43	-0.831625	3.96171	0.00104689	0.103151
LOC101798015	-1.04329	4.68753	0.0011161	0.109296
ETNK2	-1.33096	4.69807	0.00114621	0.111366
LOC101799710	5.39618	-0.403387	0.00115119	0.111366
LOC101790519	1.34472	3.20604	0.00118985	0.113795
LOC101790717	-1.02554	2.08021	0.00119056	0.113795
SBK1	-1.02559	1.89843	0.00121241	0.115193
LOC101798222	4.32899	0.597487	0.00124503	0.11714
LOC101789933	-1.77255	-0.210295	0.00126004	0.11714
TBC1D9	1.93302	2.65944	0.00126206	0.11714
LOC101800181	1.17391	0.848967	0.00126225	0.11714
CKAP2	1.29245	0.517278	0.00127604	0.117651
LOC101792125	0.916591	2.44776	0.00129019	0.117651
LOC101792402	1.99966	-0.0553004	0.00129715	0.117651
LOC101794768	1.49677	3.89504	0.00129724	0.117651
BAIAP2L2	1.37384	0.2679	0.00137382	0.1234
ERRFI1	-1.205	4.72814	0.00138656	0.1234
ENO2	1.9033	0.381088	0.00139008	0.1234
BTG2	0.893791	5.95862	0.00139156	0.1234
IGFBP2	-1.04762	6.88797	0.00143734	0.126253
LAMP5	2.81967	1.65607	0.00143955	0.126253
CDHR2	1.39847	5.61287	0.00146093	0.127428
FGG	0.799879	12.9491	0.00150519	0.130575
CACNB2	-0.882133	2.9975	0.00151815	0.130987
COL6A6	0.989508	3.38281	0.00155196	0.132874
CSF3R	1.46576	1.81583	0.00155748	0.132874
LOC101804559	4.25151	-1.29996	0.00156499	0.132874
TNS4	2.36762	-0.567189	0.00158198	0.133606
LOC101790195	1.71172	1.22079	0.00160303	0.134638
RIPPLY1	-4.90109	-1.95146	0.00161244	0.134638
LOC101804825	1.33675	0.323129	0.00161951	0.134638
LOC101804528	5.56495	-1.63647	0.00164718	0.136229
PODN	-0.850533	2.9277	0.00166739	0.136682
LOC101801959	0.996159	1.68446	0.00166978	0.136682
PIEZO1	1.10837	5.60428	0.00168263	0.137031
KCNG4	4.96553	-2.04594	0.00169505	0.137342
LOC101793560	-2.39509	-0.8426	0.0017098	0.137838
GABRA4	3.57616	-1.31577	0.00172705	0.138528
STMND1	4.85617	-2.10095	0.0017798	0.142046
TMED3	1.57201	3.37434	0.00181381	0.14404
MMP13	3.1132	1.73963	0.00184305	0.145637
TMEM27	1.06308	3.46071	0.0019412	0.152638
LOC101797576	-1.07529	7.18722	0.00197667	0.154665
ADRA1B	-0.732709	5.30109	0.00201243	0.15576
LOC101796326	5.26254	-1.83915	0.00202415	0.15576
SLC22A2	-1.01455	4.63418	0.00202604	0.15576
SLC25A48	1.21201	3.28334	0.00202971	0.15576
LOC101802435	1.12157	0.959284	0.00208401	0.158715
PRSS12	-1.82315	-0.588011	0.00208809	0.158715
EDA2R	0.949482	2.27446	0.00213494	0.161182
SCRN1	2.58964	-0.252384	0.00214869	0.161182
STPG1	-1.04481	2.68871	0.00215893	0.161182
LAMC2	1.51512	-0.326604	0.00216782	0.161182
LOC101804904	0.743451	6.41089	0.00217104	0.161182
PPAT	-1.16148	7.54444	0.00225603	0.166716
CACNA2D3	1.70601	3.15681	0.00226962	0.166948
LOC101804420	2.4626	-0.102289	0.00228744	0.167487
ZNF704	-0.750533	5.3756	0.00239112	0.174279
LOC101790354	-1.56126	6.39586	0.00241321	0.174812
LOC101793310	3.82597	0.512141	0.00243859	0.174812
LOC101793557	5.17727	-1.89476	0.00244852	0.174812
LOC101798765	5.17727	-1.89476	0.00244852	0.174812
AMDHD1	-0.807704	6.68924	0.0024532	0.174812
ZBTB16	-1.79623	3.89264	0.00248232	0.176101
LOC101795426	4.52439	-0.462832	0.0026517	0.187285
TMEM67	-1.88273	2.00517	0.00279638	0.195554
LOC101800730	3.8994	0.729501	0.00280157	0.195554
C8A	0.8722	8.65746	0.0028138	0.195554
BTBD11	1.1704	1.14088	0.00281778	0.195554
LOC101790943	1.09115	0.606859	0.00284984	0.196461
SLC25A47	-1.18138	2.96531	0.00285547	0.196461
CHKA	2.07398	7.22162	0.00289029	0.197454
CLDN3	0.979063	2.3773	0.00289463	0.197454
OPRD1	-0.833635	3.40913	0.00294222	0.198395
HEXA	0.865338	5.55258	0.00294772	0.198395
LOC101791000	3.08272	2.94934	0.00295322	0.198395
CACNA1H	-0.827464	3.25338	0.00295839	0.198395
LOC101802777	3.80069	-1.03031	0.00297058	0.198395
LOC101795776	0.708015	4.59186	0.0029983	0.199315
GATSL1	1.15394	1.1852	0.00300932	0.199315
GART	-0.856158	10.3422	0.00305854	0.201738
SLC9A2	-4.78302	-2.01046	0.00307231	0.201812
LOC101794522	0.985226	1.43777	0.00311019	0.203463
LOC101800403	5.08561	-1.95266	0.00315254	0.205391
LOC101794341	-3.26871	7.25486	0.00324392	0.210486
LOC101797047	0.89924	1.87915	0.00326717	0.211136
LOC101791499	2.715	1.40609	0.0033203	0.213704
LOC101803865	-1.23113	0.348947	0.00334801	0.214622
RAB42	2.90109	-1.29723	0.00344682	0.219516
PTCHD1	2.11693	2.68287	0.00345185	0.219516
MPP5	0.780443	4.25283	0.00347888	0.220357
LOC101803723	1.33917	-0.135059	0.00354637	0.223744
NCKAP5	-0.895287	2.21735	0.00359161	0.225706
BVES	1.75002	0.0340517	0.00362841	0.227059
ESRRB	-1.323	2.58664	0.0036416	0.227059
SOX5	-0.654036	5.05624	0.0036754	0.228275
LOC101792351	4.36701	-1.1949	0.00369644	0.228688
LOC101801099	-4.77669	-2.01287	0.0037407	0.228688
KCNMB4	-3.1325	-1.78264	0.00374379	0.228688
LOC101802281	-0.93849	8.57535	0.00374881	0.228688
LOC101794856	-1.26923	0.305643	0.00375368	0.228688
LOC101800035	-0.848685	9.36596	0.00385348	0.233875
LOC101799018	-1.44455	0.0324866	0.00404415	0.244518
LOC101805035	2.1265	-1.34851	0.00407351	0.245363
LOC101799820	1.1699	1.53589	0.00414866	0.248951
DNAH8	1.51169	-0.391634	0.00425233	0.254216
RHCG	4.97415	-2.09278	0.00428636	0.255295
LOC101795898	4.81653	-2.11717	0.00431251	0.255897
LOC101791195	4.2742	-1.26574	0.00434418	0.256819
PSD3	-1.00821	3.85452	0.00436539	0.256819
LOC101798440	1.31576	4.14014	0.00437632	0.256819
DNAJC12	-2.38295	4.10614	0.00439438	0.25693
LOC101803665	1.57397	2.13385	0.00443836	0.25693
STAP1	-2.18162	-1.21588	0.00444101	0.25693
TMPRSS4	1.24011	0.0994264	0.00444259	0.25693
LOC101791057	2.36486	-1.66077	0.0044783	0.25806
LOC101792082	0.827011	2.30074	0.00452045	0.259237
LOC101805313	1.9438	-1.12434	0.0045312	0.259237
LOC101790304	1.74625	-0.870955	0.00457167	0.260336
HBEGF	1.04133	0.54671	0.00458304	0.260336
SLC13A5	2.43421	-1.63696	0.00460501	0.260657
LOC101791225	-2.34216	0.575631	0.00463795	0.261594
LOC101791427	1.10407	0.777855	0.00466401	0.262053
MYO16	1.52327	3.28206	0.00467893	0.262053
TSPAN32	1.54553	-0.603525	0.00474117	0.26438
PRKAG2	-0.633527	6.94462	0.0047536	0.26438
LAMA3	-0.793005	2.76803	0.00478278	0.265079
PHACTR3	-3.38578	-1.62954	0.00481909	0.266167
EIF4EBP1	-0.630805	6.99609	0.00486854	0.267762
PRPSAP2	-1.21827	5.13095	0.00488152	0.267762
TRHDE	2.34907	-1.66551	0.00502005	0.274418
LOC101797986	1.54903	-0.697464	0.00509613	0.277626
PBK	1.29949	-0.00408485	0.00511575	0.277747
MMP7	1.92204	-0.859922	0.00530674	0.28714
RASGRF2	2.17996	-1.51922	0.00534064	0.287405
SIM2	-3.29793	-1.67799	0.00536697	0.287405
LOC101801312	1.98136	-1.25694	0.00537978	0.287405
LOC101796065	2.03012	-1.22913	0.00539768	0.287405
LOC101791467	3.33735	1.90665	0.0054051	0.287405
LOC101792268	1.06034	1.49834	0.00541969	0.287405
LOC101796990	-0.8531	3.54647	0.0054505	0.287672
LOC101794967	4.65227	-2.18653	0.00546075	0.287672
POPDC3	2.17252	-1.52114	0.00551185	0.288567
KLF15	-0.955922	5.95007	0.00551846	0.288567
GDPD2	4.77169	-2.13403	0.00553199	0.288567
CHGB	1.05963	1.24951	0.00555104	0.288618
CCR6	-1.82048	-0.585058	0.00561372	0.290929
MOB2	-0.718002	5.70986	0.00564136	0.291125
LOC101795406	4.66079	-2.1837	0.00565397	0.291125
C1QTNF1	-1.47466	2.27277	0.00569951	0.292526
LOC101790985	2.06498	-1.38322	0.00578878	0.296155
LOC101791773	3.43604	-0.910835	0.00588153	0.297297
CD274	1.11962	0.938886	0.00591656	0.297297
LOC101795297	-1.27303	0.135605	0.00592668	0.297297
ABCG5	-1.33565	4.4689	0.00593204	0.297297
LOC101790958	0.958411	3.90186	0.00594037	0.297297
ABCA4	0.916699	5.5248	0.00594321	0.297297
EXOC4	-0.681698	5.72111	0.00594492	0.297297
LOC101803029	-0.662504	4.96195	0.0059982	0.297297
LOC101804071	1.41974	0.889262	0.00600683	0.297297
DPEP1	1.64048	-0.624043	0.00602344	0.297297
KPNA2	0.982778	1.52747	0.00602668	0.297297
LOC101799268	2.05872	-1.38526	0.0060346	0.297297
HORMAD1	1.54987	-0.87342	0.00612715	0.300928
MFAP2	-0.726496	3.3067	0.00619428	0.303291
GOLPH3L	0.959994	2.33226	0.00625669	0.305411
FADS2	1.04676	10.7282	0.00629084	0.30565
MEGF11	-1.48961	0.591179	0.00629988	0.30565
LOC101801882	1.9569	-0.415356	0.00633759	0.30653
LOC101795687	4.16323	-1.60052	0.00635643	0.30653
LOC101789497	1.04681	0.426714	0.00640392	0.307157
LOC101795872	1.73795	-0.982813	0.00640793	0.307157
LOC101797522	1.33177	4.18564	0.0064641	0.308922
LOC101797123	1.91372	-1.29525	0.0065529	0.312231
LOC101796332	1.23454	-0.0948247	0.00659818	0.312368
LOC101801190	1.43371	1.90743	0.00661252	0.312368
LOC101798306	-0.748215	4.35049	0.00662698	0.312368
SLC26A4	1.60764	1.08491	0.00663405	0.312368
LOC101795543	-0.747997	3.27246	0.00667055	0.313163
LOC101799270	4.31314	-0.203567	0.00675817	0.315033
AMPH	-1.35349	2.97926	0.00675916	0.315033
LOC101804866	1.3923	-0.15627	0.00676961	0.315033
NRG3	-1.12532	0.483844	0.00679314	0.315209
LOC101804425	0.919837	2.71844	0.00684099	0.31651
LY86	0.766916	3.47382	0.00689735	0.318195
LOC101804234	1.75138	-0.861021	0.00692054	0.318222
CERS1	-1.34113	-0.313603	0.00693944	0.318222
TMCO6	0.858017	2.33468	0.00695774	0.318222
IL22RA1	1.73856	0.98434	0.00701082	0.319621
FAM134B	0.928463	3.02651	0.00704694	0.319621
SPAG1	1.00765	0.583528	0.00707866	0.319621
ARHGEF10	-0.756632	2.49474	0.00709083	0.319621
DHTKD1	-0.805747	6.28356	0.00712114	0.319621
RPAIN	-2.41745	-1.67956	0.00714015	0.319621
IDH1	-0.797005	8.30943	0.00714875	0.319621
ELOVL7	0.885628	1.34318	0.00716656	0.319621
LOC101800539	1.83577	-0.799701	0.00717884	0.319621
ADAMTSL2	0.976305	1.91804	0.00718857	0.319621
LOC101795742	2.25959	-1.71289	0.00722042	0.319991
LOC101799417	2.28195	-1.70273	0.00723841	0.319991
LOC101799463	1.55541	-0.784154	0.00729745	0.319991
KCNK3	2.78634	-1.75107	0.00730101	0.319991
ECEL1	0.605575	4.54381	0.00731642	0.319991
KIAA1244	1.58317	0.101626	0.00731718	0.319991
PTPRN2	2.23608	-0.0878475	0.00741535	0.322104
LOC101795582	-0.632294	10.6414	0.00742588	0.322104
AARSD1	0.739847	5.46328	0.00742603	0.322104
MRPL34	-0.850211	3.2943	0.00748118	0.323617
RELL1	0.809664	3.23249	0.00750234	0.323655
LOC101805210	2.1921	-1.7457	0.00752422	0.323724
LOC101797218	-1.02733	8.93546	0.00757486	0.325027
LOC101799795	-1.22228	7.9725	0.00762076	0.325763
LOC101801364	1.20642	0.715834	0.00765219	0.325763
LOC101797942	1.80332	-1.06337	0.00765324	0.325763
GLDC	-2.15104	5.75047	0.00770839	0.327238
RNF2	-0.947337	1.4714	0.00773499	0.327496
TNIP3	0.920766	1.30362	0.00778601	0.327962
UBXN10	0.855498	1.53047	0.007796	0.327962
ENOX1	-0.824233	2.567	0.00780765	0.327962
TBC1D19	1.11637	1.23378	0.0078461	0.328599
KCNIP2	0.985855	1.93751	0.00786398	0.328599
TCF7	-0.837693	5.01713	0.00790383	0.329402
HERC1	-0.590255	7.89241	0.00801472	0.333153
LOC101793087	1.4358	0.725683	0.00806406	0.333875
LOC101795624	2.09293	-1.57892	0.00807391	0.333875
PTPN14	-0.881215	1.5046	0.00815226	0.336244
MGP	0.772916	2.62	0.00817663	0.33638
AGBL3	0.846918	1.33521	0.00823396	0.337867
IL10RA	1.27252	2.63982	0.0083937	0.343539
LOC101802483	-0.844597	2.94154	0.00847904	0.345194
FSD1L	1.16812	2.38571	0.00848174	0.345194
LOC101799378	-1.4616	-0.337592	0.00852233	0.345194
B4GALT2	0.637136	3.61065	0.00853341	0.345194
SGSH	0.62057	5.29734	0.00855538	0.345194
ABCA12	-0.874605	2.68087	0.00856652	0.345194
DGAT2	0.928826	4.32814	0.00858551	0.345194
KALRN	-0.666404	7.31103	0.00864629	0.346764
ACTA1	2.52867	1.90392	0.00876825	0.350774
PSAT1	-0.976095	7.72009	0.00882185	0.352036
EZR	0.767526	1.80935	0.00885696	0.352381
LOC101793179	-1.70629	-0.95916	0.00887465	0.352381
LOC101802491	2.03986	-1.59184	0.00894932	0.35336
CDO1	-0.907607	8.74562	0.00896389	0.35336
DPH6	-0.94837	3.34284	0.00899921	0.35336
LOC101795062	-0.77718	2.94756	0.00900018	0.35336
WDR24	0.644932	4.94991	0.00901	0.35336
CNTN4	-1.44147	0.335989	0.00907646	0.354642
KIF17	1.39883	-0.146201	0.00908712	0.354642
B3GNT7	1.34617	-0.430168	0.00915653	0.356479
LOC101794465	1.70964	-0.996612	0.00919594	0.357142
NCF2	0.747163	2.37415	0.00922218	0.357292
LOC101793725	1.21392	2.536	0.0092895	0.358707
IFT46	1.36951	-0.47981	0.00930365	0.358707
MRVI1	-0.756727	2.10533	0.00935967	0.359998
LOC101800589	1.10454	0.677408	0.00939445	0.360467
LOC101796243	1.8711	-1.3145	0.00960842	0.367793
LOC101805454	-0.952611	1.91861	0.00975331	0.372446
LOC101795287	1.80558	-1.19988	0.00989516	0.375505
FGA	0.628031	13.6981	0.00993352	0.375505
KIAA1598	-0.745641	2.81073	0.0099607	0.375505
OLFML1	0.944525	1.6563	0.00996672	0.375505
LOC101804368	-4.50335	-2.14083	0.00998014	0.375505
LOC101799813	-0.719481	3.82997	0.00999339	0.375505
LOC101796765	0.958136	1.8127	0.0100151	0.375505
LOC101793402	-1.43269	-0.554554	0.0100216	0.375505
LPAR3	1.37731	-0.546538	0.0100846	0.376305
TDRD1	-4.50302	-2.141	0.0100901	0.376305
COLQ	4.47296	-2.25953	0.010161	0.378065
LOC101801689	-4.50546	-2.13977	0.0102224	0.378973
NINJ1	0.720313	4.96082	0.0102329	0.378973
OAT	-0.743289	6.35672	0.0102901	0.379428
DUSP8	1.05471	1.15713	0.0102927	0.379428
ABCG4	-1.06386	0.844497	0.0103478	0.380578
RAB32	0.731558	3.21039	0.0103826	0.380984
LOC101791023	-4.50601	-2.13959	0.0104821	0.382913
LOC101797119	4.60443	-2.20611	0.0104832	0.382913
CAT	-0.674918	9.64808	0.0105134	0.383138
OGFOD1	0.718429	4.88493	0.0105794	0.384665
LOC101793210	1.78064	-1.08127	0.0106433	0.385493
ABCC2	-0.66475	7.69688	0.0106528	0.385493
LOC101793063	0.985403	1.51943	0.0106746	0.385493
DRAM1	0.618809	3.84923	0.0107037	0.385542
LOC101802217	-1.38203	6.1198	0.0107243	0.385542
ARFRP1	1.10714	6.52383	0.0107536	0.385727
POSTN	-0.651749	6.18834	0.0108265	0.387472
USH1G	0.946869	2.16916	0.0108648	0.387528
UPP2	-1.74673	4.35496	0.0108766	0.387528
SLIT3	0.789722	2.24146	0.011044	0.391742
MTHFD1	-0.795732	9.82307	0.011102	0.39226
SPI1	0.637341	4.83822	0.0111077	0.39226
MICAL2	-0.879812	5.25246	0.0111812	0.393985
VANGL1	-0.613527	4.01321	0.0112116	0.394186
CRIP2	-0.665846	4.25249	0.0113019	0.396275
IL18	1.07323	0.538964	0.0113207	0.396275
MTHFD1L	-0.747221	5.2044	0.0114473	0.399336
LOC101803005	0.656102	3.15895	0.0114626	0.399336
LOC101797096	4.73553	-2.14225	0.0115181	0.399336
LOC101802401	4.73553	-2.14225	0.0115181	0.399336
OLFML2B	1.22668	2.52509	0.0115333	0.399336
DAPK2	-0.605631	4.82879	0.0117011	0.403723
CLDN10	1.19851	-0.327585	0.0117105	0.403723
FTCD	0.746422	8.48418	0.0117909	0.404944
DSP	1.04188	5.31119	0.0117967	0.404944
LOC101791992	1.13538	2.898	0.0118413	0.405423
LOC101805096	2.47934	0.121299	0.0118786	0.405423
ELMOD1	-2.32695	-1.73248	0.0118869	0.405423
DFNB31	0.820878	3.84804	0.0119977	0.407298
FARP1	-0.662135	6.10242	0.0120034	0.407298
CCNE2	-1.05533	1.90087	0.0120184	0.407298
MCCC1	-0.809965	3.76731	0.012124	0.410006
TCTN2	1.20085	1.29934	0.0121733	0.410805
GHRHR	2.12406	-1.53439	0.0124006	0.416391
CCNA1	1.44138	-0.664621	0.0124172	0.416391
SERPINB1	0.744721	2.42104	0.0124362	0.416391
LOC101803964	0.892224	0.797341	0.0124432	0.416391
BCL6	0.674045	5.03955	0.0125524	0.419166
METTL20	-0.819726	1.59926	0.0125833	0.41932
HKDC1	1.11216	2.2655	0.0126535	0.420782
MTFR2	0.877964	0.764143	0.0127487	0.422552
EDA	1.09994	2.3817	0.0128716	0.425376
LOC101804010	1.14026	-0.198477	0.0129769	0.42564
LOC101792269	1.98883	-1.61518	0.0129843	0.42564
TFRC	-0.790343	8.36861	0.0130101	0.42564
LOC101795694	1.37188	0.356712	0.0130129	0.42564
LOC101800054	0.634241	4.17085	0.013052	0.426045
LOC101802020	2.01447	-1.60176	0.013112	0.427131
BDNF	-2.50355	-1.62808	0.013168	0.427754
TSTD3	0.727446	2.11423	0.0131848	0.427754
SAMD12	0.78495	2.4378	0.0132235	0.428142
LOC101796143	-0.717642	2.09164	0.0133848	0.432485
EPAS1	-0.6463	9.91003	0.0134421	0.432952
IFI30	0.828947	4.27161	0.0134535	0.432952
FABP4	1.22349	0.26028	0.0135382	0.434802
LOC101800381	-0.818479	1.50328	0.0136327	0.436125
P2RX2	1.93011	-1.02012	0.013634	0.436125
LAPTM4B	1.12992	1.34547	0.0138483	0.442094
LOC101801843	1.13778	0.588463	0.0139515	0.444499
TYR	2.15021	-0.223809	0.0140211	0.444857
NOX4	-0.816741	1.87129	0.0140427	0.444857
LOC101803854	1.81241	-1.34491	0.0140779	0.444857
TMEM237	0.855452	1.29251	0.0141278	0.444857
RORA	-0.661052	2.49947	0.0141315	0.444857
LOC101795915	-0.770056	3.04131	0.0141689	0.444857
TGFBI	0.831408	4.46169	0.0142008	0.444857
LOC101791204	-0.605027	4.54767	0.0142136	0.444857
PNLDC1	1.60103	0.67092	0.014273	0.445843
GNG11	0.831322	4.10226	0.0143127	0.44621
LAMP3	0.888983	3.6492	0.0143974	0.447977
SPHK1	0.828891	4.25352	0.0144376	0.448351
LOC101794808	0.964201	0.761834	0.0144983	0.449363
SLC2A12	1.45702	0.654293	0.0145906	0.451349
LOC101795986	-1.83732	-1.00919	0.0146691	0.452117
LOC101805190	-0.857204	7.22454	0.0146721	0.452117
LOC101798651	1.33732	3.0865	0.0148079	0.455422
LOC101796459	-1.71198	-1.2937	0.0148666	0.456348
LOC101802453	-0.849612	1.39279	0.0149809	0.458972
UCK2	0.786786	3.06663	0.0151461	0.463146
LOC101803125	-1.28944	-0.645506	0.0152491	0.465404
KIAA1107	1.10124	2.78648	0.0153925	0.467991
DHX32	1.79682	-1.35348	0.0154417	0.468595
CDT1	0.7678	1.62392	0.0154972	0.469386
LOC101789564	-1.09891	0.0606849	0.0158594	0.478227
LOC101803926	1.62721	-1.03631	0.0159023	0.478227
LOC101804111	-2.78523	-1.94823	0.0159358	0.478227
MORN5	3.04009	-2.0516	0.015954	0.478227
DHCR7	1.43573	3.53983	0.0159928	0.478227
LOC101797678	3.02267	-2.05982	0.0160015	0.478227
LOC101800166	1.41021	0.978865	0.016028	0.478227
ANXA2	0.909703	2.08635	0.0160288	0.478227
LECT1	-2.78455	-1.94858	0.0160605	0.478262
SLC16A10	-0.918891	3.81687	0.0160899	0.478262
SCN1A	-0.881068	1.20399	0.0162443	0.481956
LOC101803728	0.852962	1.68408	0.0162766	0.482016
LOC101799912	1.40615	-0.952704	0.0164067	0.484315
NTSR1	3.15776	-1.99958	0.0164149	0.484315
LOC101797294	0.847624	2.42205	0.0164685	0.485
TOP2A	0.666635	2.31865	0.0166153	0.488422
SLC6A14	1.18294	2.48368	0.0166905	0.489732
SLC48A1	-0.666787	2.85865	0.016791	0.491287
TRPM6	1.17583	-0.399662	0.0168051	0.491287
LOC101802554	3.14338	-2.00496	0.01686	0.491561
CASQ2	-1.62927	-0.836882	0.0168892	0.491561
LOC101804989	-0.742184	4.82834	0.017051	0.493952
LOC101802463	1.04609	-0.0642585	0.0171094	0.494746
ARL4A	-0.591567	4.48237	0.0171445	0.494865
KCNU1	1.56228	-0.965924	0.0172374	0.495546
TSPAN9	0.639167	7.20073	0.0172568	0.495546
TRIM35	1.22995	-0.366795	0.0172822	0.495546
STOML3	1.10146	3.40125	0.0173122	0.495546
LOC101795567	0.581655	4.00655	0.0173233	0.495546
LCA5L	0.997227	0.632575	0.0173659	0.495876
PROSER2	-0.860522	3.96471	0.0175723	0.50022
MIS12	1.16001	-0.291846	0.0175807	0.50022
LOC101797553	-1.23688	2.19929	0.0177549	0.504276
LOC101793964	-0.867483	1.72645	0.0178327	0.505032
SLC4A11	-0.868454	1.42476	0.0179052	0.505032
LOC101796105	0.77464	1.7817	0.0179076	0.505032
LOC101795366	0.885882	0.645659	0.017908	0.505032
LOC101789692	0.908473	1.30004	0.0179658	0.505617
LOC101792083	1.15517	-0.192196	0.0180763	0.50644
LOC101792744	2.19233	-1.78548	0.0181186	0.50644
CETN3	-0.653889	2.46823	0.0181483	0.50644
CHRM4	-1.06123	0.124812	0.0182782	0.509175
OXSM	0.700074	2.64349	0.0183759	0.511003
LOC101803785	0.959643	0.69355	0.018436	0.511782
KCNB1	-0.956868	0.559346	0.0185973	0.515366
GRK4	1.35912	3.3733	0.018642	0.515708
MASP2	0.653302	6.40049	0.0187252	0.517115
FMO3	-1.25615	8.40394	0.0188156	0.518536
LOC101803478	-4.34168	-2.21016	0.0188417	0.518536
RD3	0.749108	3.19381	0.018924	0.518685
SOD3	0.932136	1.63707	0.0189645	0.518685
LOC101795875	2.47132	-1.25202	0.0189885	0.518685
DYX1C1	0.77293	1.26024	0.0189964	0.518685
LOC101791638	4.43504	-2.27605	0.0190096	0.518685
LOC101802785	0.705931	1.72671	0.0190434	0.518721
KCNJ10	4.2616	-2.33886	0.019108	0.519179
ADAM20	-4.34099	-2.2105	0.0191253	0.519179
NRXN1	-0.583418	4.03287	0.0192483	0.520961
LOC101801969	4.42648	-2.27901	0.019312	0.520961
LOC101800944	-1.11831	-0.397257	0.0193185	0.520961
LOC101790259	-0.822658	7.45326	0.0193546	0.520961
RBP7	1.19641	0.242221	0.0193569	0.520961
LOC101798551	0.878325	1.0436	0.0193907	0.520961
PTPRR	1.70385	2.80447	0.0194263	0.520961
LOC101804259	-0.778593	2.24298	0.019452	0.520961
LOC101805430	1.40698	0.0689334	0.0196757	0.526069
ANKFN1	1.64111	-1.02937	0.0197416	0.526948
SLC16A7	-0.714345	2.69222	0.0198435	0.527529
LOC101797884	-1.30237	-0.354645	0.0198818	0.527529
LOC101803976	0.803832	12.6613	0.0199424	0.527529
RRBP1	0.606574	8.89989	0.0199547	0.527529
ACE2	0.898539	1.07283	0.019969	0.527529
RPGRIP1L	0.730818	2.17618	0.0200239	0.527529
LOC101804990	0.724512	1.38468	0.0200282	0.527529
LOC101791821	1.91063	-1.65277	0.0200527	0.527529
SLC35F1	-1.37065	-0.656479	0.0200608	0.527529
SLC6A18	1.80921	-1.51411	0.0201238	0.528317
CCDC39	-1.82168	-1.21862	0.0201872	0.528534
ANGPTL5	-2.40578	-1.67373	0.0201983	0.528534
PCDHAC1	-1.32915	-0.41953	0.0202408	0.528615
LOC101793645	-0.846021	7.02133	0.0202677	0.528615
LOC101797486	-0.811942	7.90772	0.0203277	0.529316
LOC101804095	1.35148	5.60108	0.0204682	0.530802
LOC101805184	1.2863	2.90958	0.0204759	0.530802
TNFRSF6B	1.31194	4.94621	0.0204845	0.530802
LOC101795924	-0.639075	3.55333	0.0205392	0.531357
PPM1K	-1.76111	4.66155	0.0206181	0.53225
LOC101802647	-4.34557	-2.20872	0.0206738	0.53225
MND1	1.33691	-0.901073	0.0207606	0.533624
CMTM8	1.05329	0.594891	0.0209445	0.536944
CDK14	-0.809996	0.98894	0.020957	0.536944
ABCG8	-1.19298	4.46771	0.0211081	0.539526
LOC101797502	0.721381	8.86544	0.0211254	0.539526
ORMDL2	0.596341	5.35404	0.0212078	0.540764
HTR4	-0.999048	0.521374	0.0212917	0.542039
LOC101801461	0.707067	2.61816	0.0213749	0.543291
LOC101795398	1.0133	0.870445	0.0214489	0.544149
FREM1	-0.723176	1.86244	0.0214769	0.544149
LOC101797806	1.24341	-0.700139	0.021846	0.55033
METTL18	0.61157	2.76627	0.0218602	0.55033
ITGB8	1.34153	-0.894994	0.0219648	0.55033
LOC101792638	0.704039	1.54711	0.0219692	0.55033
DRD3	1.06999	-0.0538277	0.0220012	0.55033
LOC101793135	0.835721	2.40968	0.0220083	0.55033
LOC101803041	0.714402	5.94405	0.0220508	0.55033
LOC101798019	0.987882	7.5894	0.0220656	0.55033
LOC101802072	1.288	-0.595294	0.0222951	0.553114
LOC101800399	-0.956146	1.66075	0.0223046	0.553114
WDR88	-1.44026	-0.670494	0.0223489	0.553114
TCTE1	-2.21807	-1.78137	0.0223505	0.553114
LOC101790909	3.21514	-1.95249	0.0225037	0.556043
ATP13A5	1.235	-0.428258	0.022634	0.558399
CD28	-0.724091	2.24235	0.0227356	0.55873
MAST3	0.633667	2.70682	0.0227504	0.55873
PIK3C2G	1.11131	-0.380717	0.0227524	0.55873
CKB	0.810242	2.23654	0.0228285	0.559737
MIB2	-0.846393	5.68628	0.0229903	0.56284
DNAH9	-0.822001	0.741188	0.0231004	0.564668
LOC101804558	1.85657	-1.48586	0.0232068	0.566401
SFRP2	1.28827	-0.834015	0.0233377	0.568727
NID2	-0.631471	6.00431	0.0234098	0.569614
LOC101803190	-0.874227	0.580031	0.0238649	0.577766
IL2RB	-0.819178	2.06917	0.0239317	0.577766
CDH4	0.815598	4.85333	0.0239326	0.577766
TMEM108	1.22579	-0.2624	0.0239534	0.577766
LOC101795735	1.47654	-1.01555	0.023962	0.577766
WASF3	0.927883	2.45191	0.0240409	0.577923
LOC101789534	1.46801	4.38142	0.0241995	0.580143
SLC14A2	1.74613	-0.185656	0.024206	0.580143
LOC101805287	0.96105	8.61699	0.0242696	0.580795
MAN2A1	-0.625372	7.14737	0.0243849	0.581264
LOC101790407	1.0911	3.42678	0.0244638	0.581264
MAP9	-0.600335	2.8612	0.0245132	0.581264
HSP90B1	1.30637	8.52393	0.0245655	0.581264
LOC101789696	1.14739	1.17773	0.0245671	0.581264
F3	1.31719	-0.908231	0.0245798	0.581264
PDCD1LG2	0.790207	1.17309	0.0245904	0.581264
RCAN2	-0.83839	1.39933	0.0246169	0.581264
GPA33	2.28192	-1.70174	0.0247567	0.581369
PLA2G1B	1.48702	-1.11949	0.0247789	0.581369
NXPE3	0.855356	2.42288	0.0247975	0.581369
RHOB	-0.704363	4.85495	0.0248034	0.581369
G0S2	0.724867	6.05085	0.0248455	0.581501
NUDT4	-0.691136	5.93852	0.0249735	0.583641
LOC101794757	1.61924	-1.29889	0.0250512	0.583751
SORBS2	-0.678002	5.8714	0.0250513	0.583751
LOC101798767	0.669715	3.51644	0.0251684	0.584467
KIFAP3	0.795062	0.784866	0.0251794	0.584467
MDFIC	0.81381	3.80701	0.0251919	0.584467
LOC101799224	1.30121	0.000409242	0.0253365	0.586969
IGF2BP1	0.863104	1.41666	0.0254581	0.587627
MBLAC2	-0.707079	2.97305	0.0254744	0.587627
ADAMTSL1	1.37492	-0.779592	0.025493	0.587627
LOC101794910	-0.885604	2.44028	0.0255468	0.587627
LOC101797812	1.94606	5.17143	0.025549	0.587627
LOC101795816	-0.876381	8.03737	0.0256001	0.587956
LOC101803971	1.23737	-0.861598	0.0256848	0.588208
SNTG2	1.48903	-1.02251	0.0258319	0.590046
MAP3K7CL	1.14238	1.92132	0.0261281	0.595382
LOC101799766	-1.5865	1.97344	0.0261473	0.595382
COL20A1	-1.1009	1.9137	0.0262325	0.595905
LOC101801523	0.724034	1.58675	0.0262557	0.595905
ADM	-0.62589	2.98909	0.0263264	0.595905
LOC101796510	1.27705	-0.928183	0.0263569	0.595905
LOC101798569	1.19209	-0.155064	0.0264233	0.596562
LOC101791163	0.793752	2.77782	0.0265627	0.597695
CCDC112	-0.64328	2.12695	0.0266504	0.597695
CTNNA3	-0.862599	1.52244	0.0266736	0.597695
LOC101795921	2.10086	1.36416	0.0266892	0.597695
LOC101792898	-0.779873	4.03592	0.0266982	0.597695
LOC101791134	1.07619	0.169871	0.0267856	0.598812
ETV4	-1.21625	-0.389109	0.0271146	0.605198
RPH3AL	0.720547	5.60555	0.0273242	0.608298
LOC101804713	-1.22047	-0.565446	0.0274531	0.610316
SHC3	3.02248	-2.05955	0.0275333	0.610842
DRC1	2.87579	-2.12002	0.0275533	0.610842
LOC101797421	1.44859	-1.03437	0.0276121	0.611295
LOC101797626	-0.601198	2.74185	0.0277259	0.612964
DUOX2	2.88233	-2.11703	0.0279836	0.617808
LOC101790059	3.00977	-2.06515	0.0280802	0.619083
TMCC2	0.820535	1.17577	0.0282688	0.621464
ZDHHC1	1.31054	-0.578298	0.028281	0.621464
LOC101789429	-0.816486	2.91878	0.0283103	0.621464
IL11RA	0.823876	3.73314	0.0283439	0.621464
LOC101805280	-0.797194	0.735577	0.0284522	0.622983
TMEM173	1.55414	-1.33223	0.0286075	0.624623
PARPBP	1.18305	-0.586604	0.028631	0.624623
TAGLN2	0.69329	4.69349	0.0286493	0.624623
LOC101802012	-0.793518	1.81874	0.0286837	0.624623
TCTEX1D2	0.971624	1.71007	0.0287403	0.625004
LOC101805092	1.63999	-1.4331	0.0287947	0.625334
LOC101798715	0.638384	2.64137	0.0289488	0.626877
LOC101797605	1.40438	-1.05443	0.0289687	0.626877
HS3ST6	1.33187	-0.998744	0.0290163	0.626877
LOC101803211	-1.3086	1.27925	0.0290383	0.626877
PLCXD3	1.97987	1.62921	0.0290621	0.626877
BCKDHB	-0.76255	4.04829	0.0292508	0.629899
THBS2	1.28158	-1.01828	0.0292903	0.629899
FADS1	0.719951	9.2447	0.0293206	0.629899
CREB3L1	0.727678	2.22281	0.0294474	0.631773
LOC101803817	2.20703	-1.50616	0.0296247	0.634205
THNSL1	-0.619967	6.19698	0.0296402	0.634205
LOC101796387	0.881452	10.786	0.0297493	0.635688
RASGEF1A	-0.906131	3.90179	0.0299837	0.637377
LOC101789987	-0.704042	2.02552	0.0300168	0.637377
ACSBG1	-1.84071	-1.40419	0.0300514	0.637377
LOC101792868	1.08397	-0.336374	0.0300567	0.637377
LOC101804743	0.597049	2.21636	0.030076	0.637377
FAM117A	0.681589	6.21939	0.0301079	0.637377
IL20RA	1.24669	-0.171243	0.0302673	0.637798
LOC101797872	0.736676	3.10668	0.0303036	0.637798
MAPK13	0.867206	0.916867	0.0303057	0.637798
TRPM5	1.24216	-0.85805	0.0303176	0.637798
ASTE1	0.731782	1.20618	0.0303588	0.637798
LOC101793007	1.34347	-0.074071	0.0305161	0.637798
DNAI2	-0.849935	0.826959	0.0305342	0.637798
LOC101792565	-2.06658	-1.53164	0.0305848	0.637798
LOC101793887	0.75444	3.82104	0.0306073	0.637798
NFKBIZ	0.657109	2.31221	0.0306722	0.638318
LOC101804767	-2.09819	-1.83213	0.0307227	0.638394
LOC101793085	0.60868	4.43983	0.0307559	0.638394
GRIA3	1.79665	-1.70449	0.0308385	0.639278
ABCB11	-0.587273	6.79839	0.0309583	0.639517
SLC15A5	1.79122	-1.70715	0.0310021	0.639517
SCUBE3	1.49661	-1.36476	0.0310086	0.639517
LOC101798653	-2.09998	-1.83112	0.0311545	0.641662
LOC101791947	1.05423	-0.14795	0.0312875	0.643572
SLC25A4	-0.749877	4.92306	0.0313689	0.644416
LOC101801983	-1.57164	-1.3699	0.0314495	0.64511
HRH1	1.79214	-1.70769	0.0315411	0.64511
LOC101803302	1.48225	1.48859	0.0315644	0.64511
LOC101792695	2.16308	-1.75936	0.0317576	0.646748
LOC101793126	0.934042	1.33558	0.0319962	0.65006
MED8	0.622665	3.81775	0.0321191	0.651442
CACNA1D	-2.09738	-1.8327	0.0321961	0.652176
CABLES1	-0.650746	4.6564	0.0322579	0.652218
LAMB4	1.69966	-1.74799	0.0324734	0.655297
TDRD6	1.15614	-0.536226	0.0327567	0.660029
OSGIN2	0.850669	0.282691	0.0327984	0.660029
ENTPD2	-0.726833	1.4297	0.0328469	0.660029
MTMR7	0.867639	4.67105	0.0328733	0.660029
LCT	0.876288	2.22151	0.0330503	0.662398
LOC101800907	1.02418	-0.425437	0.0330743	0.662398
FGFRL1	-0.617315	7.86057	0.0332468	0.662406
LOC101796573	0.666095	2.85911	0.0333369	0.662406
PKIG	-0.621239	2.28164	0.0333452	0.662406
NMNAT2	0.771841	1.22838	0.0334765	0.662406
ZNF142	0.60011	4.15794	0.0334816	0.662406
DCX	1.05357	-0.40997	0.0335264	0.662406
FAM163B	1.13309	-0.0913123	0.0335284	0.662406
HIGD2A	0.597253	4.15794	0.0335369	0.662406
NCF4	0.649176	1.84393	0.033573	0.662406
CCL28	-2.17198	2.07677	0.0335756	0.662406
LOC101795276	0.694124	2.1294	0.0336141	0.662406
LOC101791537	1.72294	-0.268888	0.0342033	0.673185
CKAP2L	0.730974	2.10177	0.034266	0.673223
LOC101800916	0.757684	3.79758	0.0343326	0.673223
LOC101798831	0.619004	4.12199	0.0344024	0.673223
LOC101804090	1.19729	-0.198477	0.0344099	0.673223
AQP4	-2.31721	3.24206	0.0344161	0.673223
MCM8	1.01885	-0.427125	0.0347341	0.678612
ARL9	0.641755	2.01812	0.0349984	0.680138
LOC101800895	1.17964	4.72589	0.0350121	0.680138
SOX8	0.876835	0.329313	0.0352057	0.682517
LOC101804486	1.44554	0.137974	0.0356249	0.688593
TSPAN5	-0.657922	5.48512	0.035714	0.688593
LOC101791983	-4.15916	-2.28326	0.035717	0.688593
LOC101799025	-4.15951	-2.28308	0.0357195	0.688593
SLC2A9	-0.686982	5.34499	0.0359416	0.689069
LOC101791793	1.36122	-0.320465	0.0359433	0.689069
APOBEC2	4.22879	-2.3529	0.035951	0.689069
LOC101798473	-1.07426	0.291885	0.035972	0.689069
FBXW10	4.22217	-2.35575	0.0359763	0.689069
LOC101794965	-4.15954	-2.28307	0.0360349	0.689069
LOC101801753	-3.95091	-2.35998	0.0360464	0.689069
TMEM178A	-3.95172	-2.35961	0.0363422	0.693276
CHADL	4.02065	-2.42034	0.0364861	0.694762
LOC101800921	4.24191	-2.34718	0.0365183	0.694762
GALNT13	-4.16156	-2.28217	0.0366424	0.695682
LOC101794319	0.827741	0.33212	0.0366539	0.695682
MYBPC1	4.20452	-2.36144	0.0367787	0.697222
TTC34	-3.94768	-2.36143	0.0368841	0.697258
LOC101791390	0.745977	0.984583	0.0370092	0.698276
BCAS1	1.2605	-0.0593569	0.0371545	0.700189
LOC101795619	0.983127	5.26102	0.037313	0.700682
ATP6V0A4	4.04118	-2.41468	0.0373338	0.700682
LOC101802247	-0.693149	6.35044	0.0373822	0.700682
LOC101790147	1.45412	-1.13434	0.0373884	0.700682
LOC101789981	1.02446	0.18035	0.0374329	0.700682
MPP7	0.800487	0.521457	0.0374441	0.700682
LOC101798228	0.811366	8.0172	0.0375563	0.701139
LOC101805253	-0.700629	2.26724	0.0376471	0.701494
PRSS35	1.08949	1.10804	0.0377072	0.701494
TRPM8	1.53169	-1.3573	0.0378809	0.703906
NEFM	1.75262	-1.37676	0.0379366	0.70412
LOC101796577	1.7253	-1.36791	0.0379893	0.70428
SPIC	-1.39428	-0.863706	0.0380811	0.704344
LOC101791226	1.46644	-0.790927	0.0381516	0.704344
XDH	-0.895676	8.70329	0.0382017	0.704344
LOC101797371	0.913028	1.07582	0.0382447	0.704344
GPR65	0.962565	-0.108138	0.0382656	0.704344
RNF208	-0.67618	2.46258	0.0383003	0.704344
LOC101798945	-0.68041	4.44	0.0383016	0.704344
IMMP2L	-0.584174	2.63978	0.0383926	0.705205
FAM189A2	0.684469	2.03358	0.0386277	0.707893
LOC101798612	-0.776478	1.27789	0.0387417	0.708356
LOC101794948	0.812437	0.414886	0.0387881	0.708394
NOXRED1	-1.11154	-0.119401	0.0388722	0.709118
LOC101792762	-1.05241	-0.270597	0.0389206	0.70919
CHGA	1.46682	0.167826	0.0390556	0.710839
FAM5B	-0.988252	-0.424725	0.0392285	0.712361
LOC101792818	-0.652379	6.32244	0.039579	0.714566
EXD1	-0.884314	1.75494	0.039604	0.714566
BTLA	-0.908941	0.126295	0.0396784	0.714566
PIANP	1.4796	-1.36982	0.0397029	0.714566
LOC101790384	-1.4877	-1.07571	0.039706	0.714566
LOC101791193	-2.29061	0.720146	0.0398012	0.714566
TENM3	0.808852	0.725503	0.039833	0.714566
LOC101794836	-0.705214	8.28676	0.039884	0.714566
KCNE3	0.847648	0.406174	0.0399112	0.714566
LOC101799978	0.676638	1.94749	0.0399127	0.714566
LOC101798954	-0.820148	0.493687	0.0399164	0.714566
LOC101803392	1.09282	-0.443424	0.0400247	0.715425
RSAD2	1.00648	4.2077	0.0403202	0.717629
ACSS1	0.595484	2.75503	0.0404302	0.718649
LOC101793492	1.06751	2.62509	0.0405406	0.71981
KLRG1	-0.800927	0.513658	0.040843	0.723113
KLF3	-0.589082	5.05277	0.0408966	0.723113
RYBP	-0.712611	1.06719	0.0409041	0.723113
PHF21B	1.20183	0.313577	0.0409079	0.723113
LOC101801186	-0.803753	1.21173	0.0409861	0.723384
LOC101792296	-0.584693	2.16652	0.0411558	0.725088
CAMKMT	-0.644653	1.84283	0.0412833	0.726505
EFHC2	1.22801	1.0702	0.0413456	0.726505
LOC101803280	0.716138	0.986895	0.0414183	0.726505
SRCIN1	0.739092	1.03491	0.0415416	0.727867
LOC101791046	-1.15398	-0.674816	0.0416022	0.728129
BARX2	1.12963	-0.685613	0.0417881	0.730583
LOC101790727	-0.653195	2.59775	0.0418879	0.730727
ABHD8	-1.25694	-1.07945	0.0419641	0.731081
LOC101803476	-0.878781	5.10609	0.0419998	0.731081
ERCC6L	1.03305	-0.254318	0.0422801	0.732932
PCDH15	-0.934368	-0.195269	0.0422881	0.732932
PCBP3	-0.75394	1.07024	0.0424066	0.732932
LOC101799635	-0.659047	3.05864	0.0424091	0.732932
NPAS2	0.780413	2.44823	0.0424375	0.732932
ABTB2	-0.641337	3.63559	0.0424524	0.732932
LOC101790169	0.691503	2.35498	0.0425339	0.732932
LOC101793821	-1.77892	-1.44961	0.0425619	0.732932
HTR1F	-1.01774	0.195488	0.0425653	0.732932
LOC101801548	0.967415	2.5096	0.0427275	0.734314
LOC101795038	-1.46492	-1.06981	0.0427836	0.734314
LOC101796625	1.05533	-0.467711	0.0429995	0.737226
SYT6	0.969794	0.597522	0.0431088	0.738174
LOC101791882	0.912224	0.58789	0.0431473	0.738174
KRT19	1.05971	-0.241172	0.0432622	0.738267
METTL5	0.632048	1.51771	0.0432698	0.738267
LOC101791446	0.621012	2.94217	0.0436568	0.74291
SPP1	0.639338	4.2258	0.0437659	0.743974
PYCRL	-0.616645	4.15447	0.0439095	0.744305
SAMD15	1.52753	-0.741878	0.0439501	0.744305
LRRC73	1.12645	-0.918553	0.0440942	0.745584
SCN4A	2.03116	5.41776	0.0442641	0.746796
ANK2	0.778528	0.45285	0.0443206	0.746796
SRA1	0.59665	5.56998	0.0443926	0.746796
TTC14	-0.665036	6.37132	0.0444092	0.746796
LOC101799041	0.746184	1.6148	0.0444977	0.746868
LOC101797126	-0.617646	2.97416	0.0447931	0.75025
LOC101800516	-1.42197	-0.940411	0.0451198	0.754138
LOC101798022	0.64161	1.24743	0.0452327	0.754609
TUB	0.815761	0.293151	0.0452425	0.754609
MMEL1	0.989031	0.69019	0.0454231	0.756042
PTTG1	0.894867	-0.0158246	0.0456524	0.758039
GPX3	1.50534	6.77375	0.0457509	0.758039
MEST	0.712412	3.95362	0.0457806	0.758039
CFH	0.59433	10.3193	0.0458382	0.758207
LGR5	0.747314	0.462986	0.0460101	0.758409
ST8SIA5	-0.877452	4.87572	0.0460497	0.758409
LOC101794909	0.593342	2.82485	0.0461221	0.758409
LOC101802130	-0.759324	2.11174	0.0461355	0.758409
LOC101791581	-1.16751	-0.677285	0.0462925	0.760147
TUBGCP5	0.586068	1.9611	0.0463365	0.760147
STARD5	0.667206	3.6565	0.0469363	0.765875
ANKRD66	1.6948	1.29338	0.0469654	0.765875
LOC101797814	-2.50763	-2.07184	0.047005	0.765875
NEK11	2.68417	-2.19482	0.0470229	0.765875
LOC101798650	-0.724592	6.54932	0.0470927	0.765875
CERS6	-2.51393	-2.07494	0.0471061	0.765875
PDE1A	-0.83311	0.064268	0.0472641	0.766068
PAPSS2	-0.669925	3.35208	0.0473433	0.766068
LOC101804059	-0.627341	2.13365	0.0473445	0.766068
DPP10	2.70312	-2.18648	0.047451	0.766068
KIF6	-1.37886	1.35955	0.0475652	0.766068
LOC101799537	0.937957	-0.123333	0.0475883	0.766068
LOC101795736	0.990895	-0.387726	0.0476601	0.766068
LOC101797729	0.878259	-0.111209	0.0476867	0.766068
LOC101795218	1.80252	-1.49159	0.0476874	0.766068
LOC101805198	1.11287	-0.0938009	0.0477241	0.766068
LOC101791578	1.08157	-0.326623	0.0477505	0.766068
LOC101790974	2.84477	-2.13403	0.0477815	0.766068
TSNAXIP1	0.969123	-0.19353	0.0478209	0.766068
FGF23	2.04809	-1.7855	0.0478493	0.766068
BMP3	0.874315	0.929717	0.0480119	0.766818
LOC101797313	-0.639159	6.07825	0.0481005	0.766818
P2RX7	0.713485	0.846244	0.048144	0.766818
GRID2IP	1.65782	-1.76668	0.0481714	0.766818
WNT16	1.02064	-0.112382	0.0481859	0.766818
MYC	-1.01798	5.20278	0.0482804	0.766818
LOC101795522	1.69192	-1.7509	0.0483527	0.767203
CCDC68	1.42862	-1.26717	0.0485448	0.768425
LOC101797273	-0.706236	0.930435	0.0485667	0.768425
HOPX	0.724031	3.09893	0.0487186	0.768425
LOC101797638	-1.33267	-0.887539	0.0489576	0.768667
LOC101789395	-2.50807	-2.0715	0.049011	0.768667
KMO	-1.13554	6.03328	0.0490911	0.768667
LOC101802749	2.25741	-1.99391	0.0490959	0.768667
FEV	1.76299	-1.93058	0.0491087	0.768667
LIPF	1.76274	-1.93067	0.0491252	0.768667
SLC6A20	1.76292	-1.72074	0.0491674	0.768667
LOC101802963	0.984501	-0.396335	0.0495739	0.77281
SLC6A13	-1.70976	-1.72922	0.0495954	0.77281
LOC101796520	0.773309	0.631075	0.0496685	0.77281
LOC101792069	1.29438	1.28045	0.0497079	0.77281
FGF14	-1.98363	-1.8907	0.0497228	0.77281
MSANTD3	0.858447	0.4161	0.0497848	0.773021
LOC101791380	1.93334	-1.05859	0.0499822	0.775331
